# Supplementary material for: Risk of cervical cancer and high-grade lesions in vulnerable women in high and upper middle-income countries: systematic review and meta-analysis.
Source: Research Square preprint supplement (doi:10.21203/rs.3.rs-6180822/v1), 2025-03-26
Supplement: Supplementary file 1 [file 06f46170614e235b7d009c7b.docx]

**Appendix 1: full search terms (MEDLINE)**

| **Search** | **Query** | **Results** |
| --- | --- | --- |
| #1 (cervical cancer) | **((((((( "Uterine Cervical Neoplasms/cytology"[Mesh] OR "Uterine Cervical Neoplasms/diagnosis"[Mesh] OR "Uterine Cervical Neoplasms/epidemiology"[Mesh] OR "Uterine Cervical Neoplasms/mortality"[Mesh] OR "Uterine Cervical Neoplasms/prevention and control"[Mesh] OR "Uterine Cervical Neoplasms/statistics and numerical data"[Mesh] ) )) OR (uterine cervical cancer [tiab])) OR (cancer of the cervix [tiab])) OR (cervix cancer [tiab])) OR (cervix neoplasm* [tiab])) OR (cancer of the uterine cervix [tiab])** | 45 624 |
| #2 (vulnerability) | **(((((((((((((((((((((((((( "Vulnerable Populations/epidemiology"[Mesh] OR "Vulnerable Populations/statistics and numerical data"[Mesh] )) OR ( "Health Disparity, Minority and Vulnerable Populations"[Mesh] OR "Vulnerable Populations"[Mesh] )) OR ( "Poverty"[Mesh] OR "Poverty Areas"[Mesh] )) OR "HIV Infections"[Mesh]) OR ( "Sexually Transmitted Diseases"[Mesh] OR "Sexually Transmitted Diseases, Bacterial"[Mesh] OR "Sexually Transmitted Diseases, Viral"[Mesh] )) OR "Transients and Migrants/statistics and numerical data"[Mesh]) OR ( "Sex Work/epidemiology"[Mesh] OR "Sex Work/statistics and numerical data"[Mesh] )) OR ( "Substance-Related Disorders/epidemiology"[Mesh] OR "Substance-Related Disorders/statistics and numerical data"[Mesh] )) OR "Mental Disorders"[Mesh]) OR "Persons with Mental Disabilities/statistics and numerical data"[Mesh]) OR "Prisoners"[Mesh]) ) OR (underserved women [tiab])) OR (disadvantaged areas [tiab])) OR (poor[Title/Abstract])) OR (HIV infect*[Title/Abstract])) OR (AIDS[Title/Abstract])) OR (immigrant*[Title/Abstract])) OR (sex work*[Title/Abstract])) OR (prostitut*[Title/Abstract])) OR (drug abuse[Title/Abstract])) OR (drug addict[Title/Abstract])) OR (mental illness[Title/Abstract])) OR (mentally disabled[Title/Abstract])) OR (prisoner*[Title/Abstract])) OR (prison inmate[Title/Abstract])** | 2 643 774 |
| #3 (RR) | | ((((("Risk/epidemiology"[Mesh]) OR ( "Incidence"[Mesh] OR "Epidemiology"[Mesh] )) OR "Prevalence"[Mesh]) OR "Mortality"[Mesh]) OR (risk*[Title/Abstract])) OR (epidemiologi*[Title/Abstract]) |  | | --- | --- | | 3 577 896 |
| #4 (combination) | #1 AND #2 AND #3 | 2 425 |

**Appendix 2 : Risk of bias assessment (Newcastle-Ottawa Scale)**

1. Women with Substance use disorder (WSUD)
2. cohort studies

|  | Reference | Representativeness of exposed cohort | Selection of non-exposed cohort | Ascertainment of exposure | Demonstration that outcome of interest was not present at start of study | Comparability | Assessment of outcomes | Length of follow-up | Adequacy of follow-ups | Total |
| --- | --- | --- | --- | --- | --- | --- | --- | --- | --- | --- |
|  | Dahlman et al. 2021 | * | * | * | * | ** | * | * | 0 | 8/9 |
|  | Weiderpass et al. 2001 | * | * | * | * | * | * | * | 0 | 7/9 |
|  | Adami et al 1992 | * | * | * | * | * | * | * | * | 8/9 |
|  | Mancuso et al 2019 | * | * | * | * | * | * | 0 | * | 7/9 |
|  | Thygesen et al. 2009 | * | * | * | * | * | * | * | * | 8/9 |
|  | Tonnesen et al. 1994 | * | * | * | 0 | * | * | * | * | 7/9 |
|  | Sigvardsson et al. 1996 | * | * | * | 0 | * | * | 0 | * | 6/9 |

1. Cross-sectional studies

|  | Reference | Representativeness of exposed cohort | Selection of non-exposed cohort | Ascertainment of exposure | Demonstration that outcome of interest was not present at start of study | Comparability | Assessment of outcomes | Total |
| --- | --- | --- | --- | --- | --- | --- | --- | --- |
|  | Reece 2007 | 0 | * | 0 | 0 | 0 | 0 | 1/7 |
|  | Soccio et al 2015 | * | * | * | 0 | 0 | 0 | 3/7 |

1. Women living with HIV (WLWH)
2. Cohort studies

|  | Reference | Representativeness of exposed cohort | Selection of non-exposed cohort | Ascertainment of exposure | Demonstration that outcome of interest was not present at start of study | Comparability | Assessment of outcomes | Length of follow-up | Adequacy of follow-ups | Total |
| --- | --- | --- | --- | --- | --- | --- | --- | --- | --- | --- |
|  | Castle et al. 2022 | * | * | * | 0 | ** | * | * | * | 8/9 |
|  | Klein et al. 2022 | * | * | * | * | ** | * | 0 | 0 | 7/9 |
|  | Malmstrom et al. 2022 | * | * | * | * | * | * | * | 0 | 7/9 |
|  | Michaud et al. 2020 | * | * | * | * | ** | * | 0 | 0 | 7/9 |
|  | Massad et al. 2017 | * | * | * | * | 0 | * | * | 0 | 6/9 |
|  | Thorsteinsson et al., 2016 | * | * | * | * | ** | * | * | 0 | 8/9 |
|  | Massad et al. 2015 | * | * | * | * | ** | 0 | * | 0 | 7/9 |
|  | Abraham et al. 2013 | * | * | * | * | * | * | * | 0 | 7/9 |
|  | Bedimo et al. 2009 | * | * | * | * | ** | * | * | 0 | 8/9 |
|  | Phelps et al. 2001 | * | * | * | * | ** | * | * | 0 | 8/9 |
|  | Hessol et al. 2004 | * | * | * | * | ** | * | * | 0 | 8/9 |
|  | Keller et al. 2015 | * | * | * | * | 0 | 0 | * | 0 | 5/9 |
|  | Silverberg et al. 2009 | * | * | * | 0 | ** | * | 0 | 0 | 6/9 |
|  | Dryer et al. 2022 | * | 0 | 0 | 0 | 0 | * | * | * | 4/9 |
|  | Chen et al. 2014 | * | * | * | * | ** | * | 0 | 0 | 7/9 |
|  | Allardice et al. 2003 | * | * | * | * | * | * | 0 | * | 7/9 |
|  | Castilho et al. 2015 | * | * | * | * | * | * | 0 | 0 | 6/9 |
|  | Clifford et al. 2005 | * | * | * | * | ** | * | 0 | * | 8/9 |
|  | Engels et al. 2008 | * | * | * | 0 | ** | * | 0 | * | 7/9 |
|  | Engels et al. 2006 | * | * | * | 0 | ** | * | 0 | * | 7/9 |
|  | Galceran et al. 2007 | * | * | * | 0 | * | * | * | * | 7/9 |
|  | Grabar et al.2019 | * | * | * | * | * | * | 0 | * | 7/9 |
|  | Mayans et al. 1999 | * | * | 0 | 0 | * | 0 | 0 | 0 | 3/9 |
|  | Sarraino et al. 1999 | * | * | * | * | * | * | 0 | * | 7/9 |
|  | Chaturvedi et al. 2009 | * | * | * | 0 | * | * | 0 | 0 | 5/9 |
|  | Chaturvedi et al. 2008 | * | * | * | 0 | * | * | 0 | 0 | 5/9 |
|  | Cooksley et al. 1999 | * | * | * | 0 | * | * | 0 | * | 6/9 |
|  | Frisch et al. 2001 | * | * | * | 0 | * | * | 0 | * | 6/9 |
|  | Gallagher et al. 2001 | * | * | * | 0 | * | * | * | * | 7/9 |
|  | Hernández-Ramírez et al., 2017 | * | * | * | * | ** | * | 0 | * | 8/9 |
|  | Hleyhel et al. 2013 | * | * | * | * | * | * | * | * | 8/9 |
|  | Mayor et al. 2016 | * | * | * | * | * | * | 0 | * | 7/9 |
|  | Newnham et al. 2005 | * | * | * | 0 | * | * | 0 | * | 6/9 |
|  | Vogel et al. 2011 | * | * | * | * | * | 0 | 0 | 0 | 5/9 |
|  | Zhang et al. 2011 | * | * | * | 0 | * | * | 0 | 0 | 5/9 |
|  | Rojas-Rojas et al. 2022 | * | * | * | * | * | * | 0 | 0 | 6/9 |
|  | Park et al. 2022 | * | * | * | * | * | * | * | * | 8/9 |
|  | Stier et al. 2021 | * | * | * | 0 | * | * | 0 | * | 6/9 |
|  | Poizot-Martin et al. 2021 | * | * | * | * | * | * | 0 | * | 7/9 |
|  | Spence et al. 2021 | * | 0 | * | * | 0 | * | 0 | 0 | 4/9 |
|  | Zhu et al. 2019 | * | * | * | 0 | * | * | 0 | * | 6/9 |
|  | Botha et al. 2023 | * | * | * | 0 | 0 | 0 | 0 | 0 | 3/9 |
|  | Lee et al. 2022 | * | 0 | * | * | 0 | * | 0 | * | 5/9 |
|  | Villalobos et al. 2023 | * | 0 | * | * | 0 | * | 0 | 0 | 4/6 |
|  | Kadhel et al. 2012 | * | * | * | * | * | 0 | 0 | 0 | 5/9 |
|  | Buchacz et al. 2010 | * | 0 | * | * | 0 | 0 | 0 | 0 | 3/9 |
|  | Salters et al. 2016 | * | * | * | * | * | * | 0 | 0 | 6/9 |
|  | Harris et al. 2006 | * | * | * | * | 0 | * | * | 0 | 6/9 |
|  | Massad et al. 2009 | * | * | * | * | * | * | * | 0 | 7/9 |

1. Case-control studies

|  | Reference | Is the case definition adequate? | Representativeness of the cases | Selection of controls | Definition of controls | Comparability | Ascertainment of exposure | Same method of ascertainment for cases and controls | Non-Response rate | Total |
| --- | --- | --- | --- | --- | --- | --- | --- | --- | --- | --- |
| **1.** | Chen et al. 2015 | 0 | * | * | * | ** | * | * | NA | 7/8 |
| **2.** | Silverberg et al. 2018 | * | * | * | * | ** | * | * | NA | 8/8 |
| **3.** | Stein et al. 2008 | * | * | * | * | ** | * | * | * | 9/9 |

1. Cross-sectional studies

|  | Reference | Representativeness of exposed cohort | Selection of non-exposed cohort | Ascertainment of exposure | Demonstration that outcome of interest was not present at start of study | Comparability | Assessment of outcomes | Total |
| --- | --- | --- | --- | --- | --- | --- | --- | --- |
|  | Morales et al. 2022 | * | * | * | 0 | ** | * | 6/7 |
|  | Srisomboon et al. 2021 | * | * | * | * | ** | * | 7/7 |
|  | Ntuli et al. 2020 | * | * | * | 0 | 0 | * | 4/7 |
|  | Ursu et al. 2015 | 0 | * | * | 0 | 0 | 0 | 2/7 |
|  | Boardman et al. 2008 | * | * | * | * | ** | * | 7/7 |
|  | Zhou et al. 2023 | * | * | * | 0 | ** | * | 3/7 |
|  | Oliveira et al. 2010 | * | * | * | 0 | 0 | 0 | 3/7 |

1. Migrants
2. Cohort studies

|  | Reference | Representativeness of exposed cohort | Selection of non-exposed cohort | Ascertainment of exposure | Demonstration that outcome of interest was not present at start of study | Comparability | Assessment of outcomes | Length of follow-up | Adequacy of follow-ups | Total |
| --- | --- | --- | --- | --- | --- | --- | --- | --- | --- | --- |
|  | Azerkan et al. 2008 | * | * | * | * | ** | * | * | * | 9/9 |
|  | Aston et al. 2019 | * | * | * | * | ** | * | * | * | 9/9 |
|  | Beiki et al. 2009 | * | * | * | * | ** | * | * | * | 9/9 |
|  | Battagello et al. 2022 | * | * | * | 0 | 0 | * | 0 | 0 | 4/9 |
|  | Campari et al. 2016 | * | * | * | 0 | * | * | 0 | 0 | 5/9 |
|  | Campari et al. 2015 | * | * | * | 0 | * | * | 0 | 0 | 5/9 |
|  | Felice et al. 2015 | * | * | * | 0 | ** | * | 0 | 0 | 6/9 |
|  | Gleize et al. 2000 | * | * | * | 0 | * | * | 0 | 0 | 5/9 |
|  | Gallo et al. 2017 | * | * | * | 0 | * | * | 0 | 0 | 5/9 |
|  | Hemminki et al. 2002 | * | * | * | * | ** | * | * | * | 9/9 |
|  | Lamminmaki et al. 2022 | * | * | * | * | ** | * | * | * | 9/9 |
|  | Makoha et al. 2008 | * | * | * | 0 | 0 | * | 0 | 0 | 4/9 |
|  | McDermott et al. 2011 | * | * | * | * | * | * | * | * | 8/9 |
|  | Mousavi et al. 2015 | * | * | * | * | ** | * | * | * | 9/9 |
|  | Prener et al. 1987 | * | * | * | 0 | ** | * | 0 | 0 | 6/9 |
|  | Raz et al. 2019 | * | * | * | * | * | * | * | * | 8/9 |
|  | Tsugane et al. 1990 | * | * | * | 0 | * | * | 0 | 0 | 5/9 |
|  | Visioli et al. 2015 | * | * | * | 0 | * | * | 0 | 0 | 5/9 |
|  | Winkler et al. 2014 | * | * | * | * | ** | * | * | * | 9/9 |
|  | Williams et al. 2013 | * | * | * | 0 | ** | * | 0 | 0 | 6/9 |
|  | Mohamed et al. 2023 | * | * | * | * | * | * | 0 | * | 7/9 |
|  | Sarkeala et al. 2023 | * | * | * | * | ** | * | 0 | * | 8/9 |

1. Women with Low socio-economic status (WLSES)
2. Cohort studies

|  | Reference | Representativeness of exposed cohort | Selection of non-exposed cohort | Ascertainment of exposure | Demonstration that outcome of interest was not present at start of study | Comparability | Assessment of outcomes | Length of follow-up | Adequacy of follow-ups | Total |
| --- | --- | --- | --- | --- | --- | --- | --- | --- | --- | --- |
|  | Jansaker et al. 2022 | * | * | * | * | ** | * | * | * | 9/9 |
|  | Hopenhayn et al. 2008 | * | * | * | 0 | * | * | * | 0 | 6/9 |
|  | Whop et al. 2016 | * | * | * | 0 | ** | * | 0 | 0 | 6/9 |
|  | Garcia-Gil et al. 2014 | * | * | * | 0 | ** | * | 0 | * | 7/9 |
|  | Luce et al. 2017 | * | * | * | 0 | * | * | * | * | 7/9 |
|  | Prummel et al. 2014 | * | * | * | 0 | * | * | * | * | 7/9 |
|  | Kaneko et al. 2022 | * | * | * | 0 | * | * | NA | NA | 5/7 |

1. Female Sex workers (FSW)
2. Cohort studies

|  | Reference | Representativeness of exposed cohort | Selection of non-exposed cohort | Ascertainment of exposure | Demonstration that outcome of interest was not present at start of study | Comparability | Assessment of outcomes | Length of follow-up | Adequacy of follow-ups | Total |
| --- | --- | --- | --- | --- | --- | --- | --- | --- | --- | --- |
|  | Gitsch et al. 1991 | * | * | * | 0 | 0 | 0 | 0 | 0 | 3/9 |
|  | Leung et al. 2013 | 0 | * | * | 0 | 0 | * | 0 | 0 | 3/9 |
|  | Mak et al. 2004 | * | * | * | 0 | * | 0 | 0 | 0 | 4/9 |

1. Cross-sectional studies

|  | Reference | Representativeness of exposed cohort | Selection of non-exposed cohort | Ascertainment of exposure | Demonstration that outcome of interest was not present at start of study | Comparability | Assessment of outcomes | Total |
| --- | --- | --- | --- | --- | --- | --- | --- | --- |
|  | Vallès et al. 2009 | * | * | * | * | 0 | * | 5/7 |
|  | Ishi et al. 2000 | * | * | * | 0 | 0 | 0 | 3/7 |
|  | Jia et al. 2015 | * | * | * | * | * | 0 | 5/7 |

1. Case-control studies

|  | Reference | Is the case definition adequate? | Representativeness of the cases | Selection of controls | Definition of controls | Comparability | Ascertainment of exposure | Same method of ascertainment for cases and controls | Non-Response rate | Total |
| --- | --- | --- | --- | --- | --- | --- | --- | --- | --- | --- |
| **1.** | Vorsters et al. 2016 | * | * | * | * | ** | * | * | NA | 8/8 |

1. Mental illness group
2. Cohort studies

|  | Reference | Representativeness of exposed cohort | Selection of non-exposed cohort | Ascertainment of exposure | Demonstration that outcome of interest was not present at start of study | Comparability | Assessment of outcomes | Length of follow-up | Adequacy of follow-ups | Total |
| --- | --- | --- | --- | --- | --- | --- | --- | --- | --- | --- |
|  | Shen et al. 2016 | * | * | * | * | * | * | * | * | 8/9 |
|  | J.Ji et al. 2013 | * | * | * | * | ** | * | * | * | 9/9 |
|  | Chou et al. 2011 | * | * | * | * | ** | * | * | * | 9/9 |
|  | Bassal et al. 2023 | * | * | * | * | 0 | * | * | * | 7/9 |
|  | Cheng et al.2023 | * | * | * | * | ** | * | 0 | 0 | 7/9 |
|  | Wu et al. 2023 | * | * | * | * | ** | * | * | * | 9/9 |
|  | Barak et al. 2005 | * | * | * | 0 | * | * | 0 | * | 6/9 |
|  | Barak et al. 2008 | * | * | * | 0 | * | * | 0 | * | 6/9 |
|  | Chen et al. 2016 | * | * | * | * | * | * | * | * | 8/9 |
|  | Goldacre et al. 2005 | * | * | * | 0 | ** | * | * | * | 8/9 |
|  | Kisely et al. 2016 | * | * | * | 0 | * | * | 0 | * | 6/9 |
|  | Litcherman et al. 2001 | * | * | * | * | * | * | 0 | * | 7/9 |
|  | Min-Lin et al. 2013 | * | * | * | * | * | * | * | * | 8/9 |
|  | Wootten et al. 2022 | * | * | * | * | * | * | 0 | * | 7/9 |
|  | Yuan-Lin et al. 2013 | * | * | * | * | * | * | * | * | 8/9 |

1. Case-control studies

|  | Reference | Is the case definition adequate? | Representativeness of the cases | Selection of controls | Definition of controls | Comparability | Ascertainment of exposure | Same method of ascertainment for cases and controls | Non-Response rate | Total |
| --- | --- | --- | --- | --- | --- | --- | --- | --- | --- | --- |
| **1.** | Hu et al. 2023 | * | * | * | * | ** | * | * | NA | 8/8 |

1. Prisoners group
2. Cohort studies

|  | Reference | Representativeness of exposed cohort | Selection of non-exposed cohort | Ascertainment of exposure | Demonstration that outcome of interest was not present at start of study | Comparability | Assessment of outcomes | Length of follow-up | Adequacy of follow-ups | Total |
| --- | --- | --- | --- | --- | --- | --- | --- | --- | --- | --- |
|  | Karsai et al. 1988 | 0 | * | * | 0 | ** | * | 0 | 0 | 5/9 |
|  | Moghissi et al. 1968 | * | * | * | 0 | ** | 0 | 0 | 0 | 5/9 |

1. Case –control studies

|  | Reference | Is the case definition adequate? | Representativeness of the cases | Selection of controls | Definition of controls | Comparability | Ascertainment of exposure | Same method of ascertainment for cases and controls | Non-Response rate | Total |
| --- | --- | --- | --- | --- | --- | --- | --- | --- | --- | --- |
|  | Jodry et al. 2021 | * | * | * | * | ** | * | * | NA | 8/8 |

1. Cross-sectional studies

|  | Reference | Representativeness of exposed cohort | Selection of non-exposed cohort | Ascertainment of exposure | Demonstration that outcome of interest was not present at start of study | Comparability | Assessment of outcomes | Total |
| --- | --- | --- | --- | --- | --- | --- | --- | --- |
|  | Proca et al. 2006 | * | * | * | 0 | 0 | 0 | 3/7 |
|  | Baillargeon et al. 2004 | * | 0 | * | 0 | 0 | 0 | 2/7 |
|  | Binswanger et al. 2009 | * | * | * | 0 | ** | 0 | 5/7 |
|  | Downey et al. 1994 | 0 | 0 | * | 0 | 0 | 0 | 1/7 |

**Appendix 3: List of studies excluded at full-text screening stage**

| **No** | **Author** | **Year** | **Title** | **Journal** | **Reason of exclusion** |
| --- | --- | --- | --- | --- | --- |
|  | H. Hope, M. Pierce, E. D. Johnstone, J. Myers and K. M. Abel | 2022 | The sexual and reproductive health of women with mental illness: a primary care registry study | Arch Womens Ment Health | Excl - Incorrect outcome (Incidence-prevalence) |
|  | C. A. Omeke, J. T. Enebe, A. I. Ugwu, N. T. Onyishi, M. C. Omeke, N. O. Enebe, E. O. Izuka and E. C. Aniwada | 2022 | The magnitude and predictors of cervical squamous intraepithelial lesions among women in Enugu, Nigeria: a cross-sectional study of women in a low-resource setting | Pan Afr Med J | Excl - not high income country |
|  | Centers for disease control | 1990 | Risk for cervical disease in HIV-infected women--New York City | MMWR Morb Mortal Wkly Rep | Excl - Incorrect publication type |
|  | R. Gupta, S. Hussain, R. Hariprasad, K. Dhanasekaran, S. Verma, V. Agarwal, Sandeep, S. Parveen, A. Kaur, C. P. Verma, Amita, R. Dwivedi, S. Singh and S. Gupta | 2022 | High Prevalence of Cervical High-Grade Lesions and High-Risk Human Papillomavirus Infections in Women Living with HIV: A Case for Prioritizing Cervical Screening in This Vulnerable Group | Acta Cytologica | Excl - not high income country |
|  | A. G. Abraham, H. D. Strickler, Y. Jing, S. J. Gange, T. R. Sterling, M. Silverberg, M. Saag, S. Rourke, A. Rachlis, S. Napravnik, R. D. Moore, M. Klein, M. Kitahata, G. Kirk, R. Hogg, N. A. Hessol, J. J. Goedert, M. John Gill, K. Gebo, J. J. Eron, E. A. Engels, R. Dubrow, H. M. Crane, J. T. Brooks, R. Bosch and G. D'Souza | 2012 | Invasive cervical cancer risk among HIV-infected women: A North American multi-cohort collaboration prospective study | Journal of Acquired Immune Deficiency Syndromes | Duplicate |
|  | O. J. Chincha Lino, N. O. Chinchihualpa Paredes and F. Samalvides Cuba | 2022 | Factors associated with normal or abnormal Papanicolaou smear among HIV-infected women at a national hospital in Lima, Peru, 2012-2015 | AIDS Care | Excl - Incorrect outcome (Incidence-prevalence) |
|  | G. M. Clifford, S. Franceschi, O. Keiser, F. Schöni-Affolter, M. Lise, S. Dehler, F. Levi, M. Mousavi, C. Bouchardy, A. Wolfensberger, K. E. Darling, C. Staehelin, B. Bertisch, E. Kuenzli, E. Bernasconi, M. Pawlita and M. Egger | 2016 | Immunodeficiency and the risk of cervical intraepithelial neoplasia 2/3 and cervical cancer: A nested case-control study in the Swiss HIV cohort study | International Journal of Cancer | Excl - Incorrect outcome (Incidence-prevalence) |
|  | L. Silva, A. Miranda, R. Batalha, L. Ferreira, M. Santos and S. Talhari | 2015 | High-risk human papillomavirus and cervical lesions among women living with HIV/AIDS in Brazilian Amazon, Brazil | Braz J Infect Dis | Excl - Incorrect outcome (Incidence-prevalence) |
|  | P. A. Dugué, M. Rebolj, J. Hallas, P. Garred and E. Lynge | 2015 | Risk of cervical cancer in women with autoimmune diseases, in relation with their use of immunosuppressants and screening: population-based cohort study | Int J Cancer | Excl - Incorrect population (othe than non vulnerable) |
|  | R. Kreitchmann, H. Bajotto, D. A. R. D. Silva and S. C. Fuchs | 2013 | Squamous intraepithelial lesions in HIV-infected women: Prevalence, incidence, progression and regression | Archives of Gynecology and Obstetrics | Duplicate |
|  | A. C. L. Araujo, N. O. Carvalho, N. C. Teixeira, T. T. Souza, E. D. Murta, I. M. Faria, C. M. Correa, M. I. M. Lima, D. M. del Castillo and V. H. Melo | 2012 | Incidence of cervical intraepithelial neoplasia in a cohort of HIV-infected women | International Journal of Gynecology & Obstetrics | Duplicate |
|  | K. Petoumenos, E. Hui, N. Kumarasamy, S. J. Kerr, J. Y. Choi, Y. M. A. Chen, T. Merati, F. Zhang, P. L. Lim, S. Sungkanuparph, S. Pujari, S. Ponnampalavanar, R. Ditangco, C. K. C. Lee, A. Grulich, M. G. Law and T. A. H. Observational | 2010 | Cancers in the TREAT Asia HIV Observational Database (TAHOD): a retrospective analysis of risk factors | Journal of the International Aids Society | Excl - not high income country |
|  | K. Petoumenos, E. Hui, N. Kumarasamy, S. J. Kerr, J. Y. Choi, Y. M. A. Chen, T. Merati, F. Zhang, P. L. Lim, S. Sungkanuparph, S. Pujari, S. Ponnampalavanar, R. Ditangco, C. K. Lee, A. Grulich and M. G. Law | 2010 | Cancers in the TREAT Asia HIV Observational Database (TAHOD): A retrospective analysis of risk factors | Journal of the International AIDS Society | Duplicate |
|  | S. Solikhah, D. A. Perwitasari and D. S. S. Rejeki | 2022 | Geographic Characteristics of Various Cancers in Yogyakarta Province, Indonesia: A Spatial Analysis at the Community Level | Asian Pac J Cancer Prev | Excl - not high income country |
|  | S. Lewis, M. Mphande, F. Chibwana, T. Gumbo, B. A. Banda, H. Sigauke, A. Moses, S. Gupta, R. M. Hoffman and C. Moucheraud | 2022 | Association of HIV status and treatment characteristics with VIA screening outcomes in Malawi: A retrospective analysis | PLoS One | Excl - not high income country |
|  | O. Orang'o, P. Tonui, K. Muthoka, S. Kiptoo, T. Maina, M. Agosa, A. Ermel, Y. Tong and D. Brown | 2022 | A community-based approach to cervical cancer prevention in western Kenya: An AMPATH feasibility project | Sage Open Medicine | Excl - not high income country |
|  | T. C. Wright Jr, T. V. Ellerbrock, M. A. Chiasson, N. Van Deventer and X. W. Sun | 1994 | Cervical intraepithelial neoplasia in women infected with human immunodeficiency virus: Prevalence, risk factors, and validity of papanicolaou smears | Obstetrics and Gynecology | Full text not found |
|  | F. D. Johnstone, E. McGoogan, G. E. Smart, R. P. Brettle and R. J. Prescott | 1994 | A population-based, controlled study of the relation between HIV infection and cervical neoplasia | British Journal of Obstetrics and Gynaecology | Excl - Incorrect outcome (Incidence-prevalence) |
|  | J. Joshi, B. Mali, G. Bhave and U. Wagle | 1993 | Cervical neoplasia and cytological manifestations of sexually transmitted diseases in HIV-seropositive prostitutes | Cytopathology | Excl - not high income country |
|  | V. Palacio, S. de Sanjose, S. Vazquez, M. Puente, F. Vazquez and F. X. Bosch | 1993 | Cervical neoplasia and sexually transmitted diseases among prostitutes in Oviedo, Spain | Int J STD AIDS | Full text not found |
|  | A. Schäfer, W. Friedmann, M. Mielke, B. Schwartländer and M. A. Koch | 1991 | The increased frequency of cervical dysplasia-neoplasia in women infected with the human immunodeficiency virus is related to the degree of immunosuppression | Am J Obstet Gynecol | Full text not found |
|  | A. P. Polednak, J. T. Flannery and D. T. Janerich | 1991 | Cervical cancer rates by population size of towns: Implications for cancer control programs | Journal of Community Health | Excl - Incorrect outcome (Incidence-prevalence) |
|  | M. Glezerman, B. Piura and V. Insler | 1989 | Cervical cancer in Jewish women | Am J Obstet Gynecol | Full text not found |
|  | A. E. Pitchenik, D. M. Becker, S. G. Hilsenbeck and E. J. Trapido | 1987 | Cancer among Haitians in Florida | Cancer | Excl - Not vulnerable population |
|  | B. Zemła | 1984 | The bio-social elements of risk in the invasive cervical cancer incidence among a stationary and migratory woman population. A case-control study | Neoplasma | Full text not found |
|  | S. S. Devesa and E. L. Diamond | 1980 | Association of breast cancer and cervical cancer incidence with income and education among whites and blacks | J Natl Cancer Inst | Excl - Incorrect outcome (Incidence-prevalence) |
|  | J. A. Sebastian, B. O. Leeb and R. See | 1978 | Cancer of the cervix--a sexually transmitted disease. Cytologic screening in a prostitute population | Am J Obstet Gynecol | Full text not found |
|  | M. A. van der Aa, S. Siesling, M. W. Louwman, O. Visser, E. Pukkala and J. W. Coebergh | 2008 | Geographical relationships between sociodemographic factors and incidence of cervical cancer in the Netherlands 1989-2003 | Eur J Cancer Prev | Full text not found |
|  | G. M. Clifford, J. Polesel, M. Rickenbach, L. D. Maso, O. Keiser, A. Kofler, E. Rapiti, F. Levi, G. Jundt, T. Fisch, A. Bordoni, D. De Weck, S. Franceschi, M. Battegay, E. Bernasconi, J. Böni, H. Bucher, P. Bürgisser, S. Cattacin, M. Cavassini, R. Dubs, M. Egger, L. Elzi, P. Erb, K. Fantelli, M. Fischer, M. Flepp, A. Fontana, P. Francioli, H. Furrer, M. Gorgievski, H. Günthard, B. Hirschel, L. Kaiser, C. Kind, T. Klimkait, B. Ledergerber, U. Lauper, M. Opravil, F. Paccaud, G. Pantaleo, L. Perrin, J. C. Piffaretti, C. Rudin, P. Schmid, J. Schüpbach, R. Speck, A. Telenti, A. Trkola, P. Vernazza, R. Weber and S. Yerly | 2005 | Cancer risk in the Swiss HIV cohort study: Associations with immunodeficiency, smoking, and highly active antiretroviral therapy | Journal of the National Cancer Institute | Duplicate |
|  | K. McFadden, D. McConnell, C. Salmond, P. Crampton and J. Fraser | 2004 | Socioeconomic deprivation and the incidence of cervical cancer in New Zealand: 1988-1998 | N Z Med J | Excl - Incorrect outcome (Incidence-prevalence) |
|  | M. Vall Mayans, A. Maguire, M. Miret and J. Casabona | 1999 | Disproportionate high incidence of invasive cervical cancer as an AIDS- indicative disease among young women in Catalonia, Spain | Sexually Transmitted Diseases | Duplicate |
|  | A. L. Drapkin, E. G. Livingston, R. Dodge, A. C. Coogan and W. N. P. Herbert | 1997 | Cervical intraepithelial neoplasia in hiv-infected women in a southeastern US population | Southern Medical Journal | Duplicate |
|  | K. S. Moghissi and H. C. Mack | 1968 | Epidemiology of cervical cancer: study of a prison population | Am J Obstet Gynecol | Full text not found |
|  | L. Mariani, A. Morrone, M. Preti, C. Sbiroli, F. Tomao and S. Tomao | 2008 | Migrant women and cervical cancer: background of a prevention study | Eur J Gynaecol Oncol | Excl - Incorrect outcome (Incidence-prevalence) |
|  | A. E. Luque, M. Jabeen, S. Messing, C. A. Lane, L. M. Demeter, R. C. Rose and R. C. Reichman | 2006 | Prevalence of human papillomavirus genotypes and related abnormalities of cervical cytological results among HIV-1-infected women in Rochester, New York | J Infect Dis | Excl - Incorrect outcome (Incidence-prevalence) |
|  | F. M. Gany, S. M. Shah and J. Changrani | 2006 | New York city's Immigrant Minorities: Reducing cancer health disparities | Cancer | Excl - Incorrect outcome (Incidence-prevalence) |
|  | G. Maskarinec and J. J. Noh | 2004 | The effect of migration on cancer incidence among Japanese in Hawaii | Ethnicity & Disease | Excl - Incorrect outcome (Incidence-prevalence) |
|  | L. Baezconde-Garbanati, C. J. Portillo and J. A. Garbanati | 1999 | Disparities in health indicators for Latinas in California | Hispanic Journal of Behavioral Sciences | Excl - Incorrect population (othe than non vulnerable) |
|  | P. D. Abercrombie and A. P. Korn | 1998 | Lower genital tract neoplasia in women with HIV infection | Oncology (Williston Park) | Full text not found |
|  | C. Six, I. Heard, C. Bergeron, G. Orth, J. D. Poveda, P. Zagury, P. Cesbron, C. Crenn-Hébert, R. Pradinaud, M. Sobesky, C. Marty, M. L. Babut, J. E. Malkin, A. Odier, S. Fridmann, J. P. Aubert, J. B. Brunet and I. De Vincenzi | 1998 | Comparative prevalence, incidence and short-term prognosis of cervical squamous intraepithelial lesions amongst HIV-positive and HIV-negative women | AIDS | Excl - not high income country |
|  | R. Carreras, P. Fuste and M. E. Castellanos | 1997 | Cervical intra-epithelial neoplasia in HIV-positive women and women with AIDS | International Journal of Gynecology and Obstetrics | Excl - Incorrect publication type |
|  | R. M. Klevens, P. L. Fleming, M. A. Mays and R. Frey | 1996 | Characteristics of women with AIDS and invasive cervical cancer | Obstetrics and Gynecology | Excl - Incorrect outcome (Incidence-prevalence) |
|  | K. M. Gorey and J. E. Vena | 1994 | CANCER DIFFERENTIAL AMONG US BLACKS AND WHITES - QUANTITATIVE ESTIMATES OF SOCIOECONOMIC-RELATED RISKS | Journal of the National Medical Association | Excl - Incorrect publication type |
|  | T. Dhokotera, S. Asangbeh, J. Bohlius, E. Singh, M. Egger, E. Rohner, J. Ncayiyana, G. M. Clifford, V. Olago and M. Sengayi-Muchengeti | 2022 | Cervical cancer in women living in South Africa: a record linkage study of the National Health Laboratory Service and the National Cancer Registry | ecancermedicalscience | Excl - Incorrect outcome (Incidence-prevalence) |
|  | W. Zhu, Y. Mao, H. Tang, J. M. McGoogan, Z. F. Zhang, R. Detels, N. He and Z. Wu | 2019 | Spectrum of malignancies among the population of adults living with HIV infection in China: A nationwide follow-up study, 2008–2011 | PLoS ONE | Duplicate |
|  | P. K. Manamela, K. A. Kgomo, C. J. van Gelderen, A. R. Lekha, P. Michelow, E. J. van den Berg and Y. Adam | 2018 | Low-grade squamous intraepithelial lesions among women with HIV | International Journal of Gynecology and Obstetrics | Excl - Incorrect outcome (Incidence-prevalence) |
|  | R. Abrahão, A. M. Brunson, J. M. Kahn, Q. W. Li, T. Wun and T. H. M. Keegan | 2022 | Second primary malignancy risk after Hodgkin lymphoma treatment among HIV-uninfected and HIV-infected survivors | Leukemia and Lymphoma | Excl - Incorrect population (othe than non vulnerable) |
|  | A. Wagner, A. S. Skof, J. Sehouli, R. Richter, W. Henrich, K. von Weizsacker, J. P. Siedentopf, R. Chekerov, A. M. Kaufmann and I. Rohr | 2022 | Genotype-specific high-risk human papillomavirus infections and risk factors for cervical dysplasia in women with human immunodeficiency virus in Germany: results from a single-center cross-sectional study | International Journal of Gynecological Cancer | Full text not found |
|  | Y. Y. Lin, H. Damgacioglu, R. Suk, C. F. Wu, Y. Zhu, A. P. Ortiz, S. K. Hara, K. Sonawane and A. A. Deshmukh | 2022 | Trends in the Incidence of Human Papillomavirus-Associated Cancers by County-Level Income and Smoking Prevalence in the United States, 2000-2018 | JNCI Cancer Spectrum | Excl - Incorrect outcome (Incidence-prevalence) |
|  | M. Li, D. Roder, L. J. Whop, A. Diaz, P. D. Baade, J. M. L. Brotherton, K. Canfell, J. Cunningham, G. Garvey, S. P. Moore, D. L. O'Connell, P. C. Valery and J. R. Condon | 2019 | Aboriginal women have a higher risk of cervical abnormalities at screening; South Australia, 1993-2016 | Journal of Medical Screening | Excl - Incorrect population (othe than non vulnerable) |
|  | Q. Wang, X. Ma, X. Zhang, J. J. Ong, J. Jing, L. Zhang and L. H. Wang | 2019 | Human papillomavirus infection and associated factors for cervical intraepithelial neoplasia in women living with HIV in China: A cross-sectional study | Sexually Transmitted Infections | Excl - Incorrect population (othe than non vulnerable) |
|  | R. Gupta, S. Hussain, R. Hariprasad, K. Dhanasekaran, S. Verma, V. Agarwal, Sandeep, S. Parveen, A. Kaur, C. P. Verma, Amita, R. Dwivedi, S. Singh and S. Gupta | 2022 | High Prevalence of Cervical High-Grade Lesions and High-Risk Human Papillomavirus Infections in Women Living with HIV: A Case for Prioritizing Cervical Screening in This Vulnerable Group | Acta Cytologica | Excl - not high income country |
|  | B. B. Jain, T. Adhikary, P. C. Sadhukhan and A. Nandi | 2021 | Human papilloma virus infection of uterine cervix and spectrum of cervical pathology in human immunodeficiency virus/AIDS | J Cancer Res Ther | Excl - not high income country |
|  | M. Saraiya, L. C. Cheung, A. Soman, J. Mix, K. Kenney, X. J. Chen, R. B. Perkins, M. Schiffman, N. Wentzensen and J. Miller | 2021 | Risk of cervical precancer and cancer among uninsured and underserved women from 2009 to 2017 | American Journal of Obstetrics and Gynecology | Duplicate |
|  | E. Nkwabong, B. Kengne, Y. Nkene Mawamba and Z. Sando | 2021 | Influence of the human immunodeficiency virus on cervical precancerous lesions | International Journal of Gynecology and Obstetrics | Excl - not high income country |
|  | E. Mazzotta, N. Riccardi, M. Tontodonati, C. Gabrielli, S. Mazzocato, M. Mazzetti, K. Falasca, J. Vecchiet, F. Barchiesi, D. Francisi, G. Siri, G. Cenderello and G. Parruti | 2019 | Prevalence and predictors of malignancies in HIV patients: results of a retrospective multicentric Italian cohort | Infez Med | Excl - Incorrect outcome (Incidence-prevalence) |
|  | R. Myerson, T. Y. Lu, Y. Yuan and G. G. E. Liu | 2019 | Cancer diagnosis and care among rural-to-urban migrants in China | Bmj Global Health | Excl - Incorrect outcome (Incidence-prevalence) |
|  | L. S. Park, J. P. Tate, K. Sigel, S. T. Brown, K. Crothers, C. Gibert, M. B. Goetz, D. Rimland, M. C. Rodriguez-Barradas, R. J. Bedimo, A. C. Justice and R. Dubrow | 2018 | Association of viral suppression with lower aids-defining and non–AIDS-defining cancer incidence in HIV-infected veterans: A prospective cohort study | Annals of Internal Medicine | Excl - Incorrect outcome (Incidence-prevalence) |
|  | E. Mitchell, O. B. Alese, C. Yates, B. M. Rivers, W. Blackstock, L. Newman, M. Davis, G. Byrd and A. E. Harris | 2022 | Cancer healthcare disparities among African Americans in the United States | Journal of the National Medical Association | Excl - Incorrect population (othe than non vulnerable) |
|  | A. D. Pria and M. Bower | 2022 | AIDS-related malignant disease | Medicine (United Kingdom) | Excl - Incorrect publication type |
|  | Y. M. Yu, R. Matsuyama, M. Tsunematsu and M. Kakehashi | 2021 | Quantifying the Effects of Medical Examination and Possible Risk Factors against the Incidence of Cervical Cancer in a Low Human Papillomavirus Vaccination Coverage: An Ecological Study in Japan | Cancers | Excl - Incorrect outcome (Incidence-prevalence) |
|  | H. A. Kelly, A. Chikandiwa, B. Sawadogo, C. Gilham, P. Michelow, O. G. Lompo, T. Omar, S. Zan, P. Magooa, M. Segondy, N. Nagot, N. Meda, S. Delany-Moretlwe, P. Mayaud and H. S. Grp | 2021 | Diagnostic accuracy of cervical cancer screening and screening-triage strategies among women living with HIV-1 in Burkina Faso and South Africa: A cohort study | Plos Medicine | Excl - Incorrect outcome (Incidence-prevalence) |
|  | R. Luckett, H. Painter, M. Hacker, B. Simon, A. Seiphetlheng, A. Erlinger, C. Eakin, S. Moyo, L. T. Kyokunda, K. Esselen, S. Feldman, C. Morroni and D. Ramogola-Masire | 2021 | Persistence and clearance of high-risk human papillomavirus and cervical dysplasia at 1 year in women living with human immunodeficiency virus: a prospective cohort study | Bjog-an International Journal of Obstetrics and Gynaecology | Excl - not high income country |
|  | N. Karawekpanyawong, K. Kaewkitikul, B. Maneeton, N. Maneeton and S. Siriaree | 2021 | The prevalence of depressive disorder and its association in Thai cervical cancer patients | PLoS ONE | Excl - Incorrect outcome (Incidence-prevalence) |
|  | H. A. Kelly, A. Chikandiwa, B. Sawadogo, C. Gilham, P. Michelow, O. G. Lompo, T. Omar, S. Zan, P. Magooa, M. Segondy, N. Nagot, N. Meda, S. Delany-Moretlwe, P. Mayaud, E. Cutler, D. A. Lewis, V. Maseko, B. Muzah, A. Puren, F. Djigma, J. Drabo, J. Simporé, A. Yonli, V. Costes, M. N. Didelot, S. Doutre, N. Leventoux, J. Ngou, A. Devine, L. Gibson, R. Legood, H. A. Weiss, C. Lacey, Y. Qiao, M. Chirenje, S. de Sanjosé and O. Clavero | 2021 | Diagnostic accuracy of cervical cancer screening and screening–triage strategies among women living with HIV-1 in Burkina Faso and South Africa: A cohort study | PLoS Medicine | Duplicate |
|  | J. Y. Choi, K. E. Yeob, S. H. Hong, S. Y. Kim, E. H. Jeong, D. W. Shin, J. H. Park, G. W. Kang, H. S. Kim, J. H. Park and I. Kawachi | 2021 | Disparities in the Diagnosis, Treatment, and Survival Rate of Cervical Cancer among Women with and without Disabilities | Cancer Control | Excl - Incorrect population (othe than non vulnerable) |
|  | V. B. Pontes, L. F. L. Martins, M. Szklo, M. Moreira MÂ, C. B. P. Chaves and L. M. de Almeida | 2020 | Factors associated with cervical intraepithelial neoplasia (CIN2/CIN3), early stage and advanced stage of cervical cancer diagnosis in the Brazilian Amazonian region | Eur J Cancer Prev | Excl - Incorrect population (othe than non vulnerable) |
|  | J. van de Wijgert, A. C. Gill, A. Chikandiwa, M. C. Verwijs, H. A. Kelly, T. Omar, S. Delany-Moretlwe, M. Segondy, S. Francis, A. C. Darby, P. Mayaud and H. S. Grp | 2020 | Human papillomavirus infection and cervical dysplasia in HIV-positive women: potential role of the vaginal microbiota | Aids | Excl - Incorrect outcome (Incidence-prevalence) |
|  | B. E. B. da Silva, V. S. Santos, I. E. R. Santos, E. D. Araújo, M. V. Alves, L. A. D. S. Silva, M. V. de Aragão Batista and L. M. D. de Lemos | 2020 | Prevalence and genotype distribution of human papillomavirus in women living with HIV/AIDS in an area of Northeast Brazil | Journal of Medical Virology | Excl - Incorrect outcome (Incidence-prevalence) |
|  | J. E. Cameron, D. A. C. Dennis, N. R. Herrel, A. G. Chapple and M. E. Hagensee | 2020 | Risk of abnormal cervical cytology in HIV-infected women testing positive for both human papillomavirus and Epstein-Barr virus in genital tract specimens | Cancer Causes and Control | Excl - Incorrect population (othe than non vulnerable) |
|  | N. S. Thokanit, P. Kosalaraksa, P. Jitkasikorn, T. Thonkamdee, S. Promchana and S. Wilailak | 2020 | A prognostic study of patients with cervical cancer and HIV/AIDS in Bangkok, Thailand | Gynecologic Oncology Reports | Excl - Incorrect outcome (Incidence-prevalence) |
|  | G. K. Vasnik, G. Jain, F. A. Husainy and V. Bansal | 2019 | Correlation of Cervical Squamous Intraepithelial Lesions with Human Papillomavirus in Women Infected with the Human Immunodeficiency Virus | Indian Journal of Gynecologic Oncology | Excl - not high income country |
|  | P. Du | 2019 | Human Papillomavirus Infection and Cervical Cancer in HIV plus Women | Hiv/Aids-Associated Viral Oncogenesis, 2nd Edition | Full text not found |
|  | S. Tamauchi, H. Kajiyama, Y. Moriyama, M. Yoshihara, Y. Ikeda, N. Yoshikawa, K. Nishino, K. Niimi, S. Suzuki and F. Kikkawa | 2019 | Relationship between preexisting mental disorders and prognosis of gynecologic cancers: A case–control study | Journal of Obstetrics and Gynaecology Research | Excl - Incorrect outcome (Incidence-prevalence) |
|  | A. Jiamsakul, M. Polizzotto, S. W. W. Ku, J. Tanuma, E. Hui, R. Chaiwarith, S. Kiertiburanakul, A. Avihingasanon, E. Yunihastuti, N. Kumarasamy, P. S. Ly, S. Pujari, R. Ditangco, C. D. Do, T. P. Merati, P. Kantipong, F. J. Zhang, K. V. Nguyen, A. Kamarulzaman, J. Y. Choi, B. L. H. Sim, O. T. Ng, J. Ross, W. Wong | 2019 | Malignancies in Adults Living With HIV in Asia | Jaids-Journal of Acquired Immune Deficiency Syndromes | Excl - not high income country |
|  | J. Garcia-Abellan, L. del Rio, J. A. Garcia, S. Padilla, M. J. Vivancos, J. del Romero, V. Asensi, A. Hernando, L. Garcia-Fraile, M. Masia, F. Gutierrez and CoRis | 2019 | Risk of cancer in HIV-infected patients in Spain, 2004-2015. The CoRIS cohort study | Enfermedades Infecciosas Y Microbiologia Clinica | Excl - Incorrect publication type |
|  | M. S. Rodolfo, B. B. F. Mendes, G. A. F. Guakoni and A. Chambo | 2018 | Characteristics of patients diagnosed with advanced cervical cancer in a major Brazilian city | Gazzetta Medica Italiana Archivio Per Le Scienze Mediche | Excl - Incorrect population (othe than non vulnerable) |
|  | A. Dalla Pria and M. Bower | 2018 | AIDS-related malignant disease | Medicine (United Kingdom) | Full text not found |
|  | S. Doutre, T. Omar, O. Goumbri-Lompo, H. Kelly, O. Clavero, S. Zan, A. Chikandiwa, B. Sawadogo, S. Delany-Moretlwe, V. Costes, P. Mayaud and M. Segondy | 2018 | Cervical intraepithelial neoplasia (CIN) in African women living with HIV: Role and effect of rigorous histopathological review by a panel of pathologists in the HARP study endpoint determination | Journal of Clinical Pathology | Excl - Incorrect outcome (Incidence-prevalence) |
|  | A. P. Ortiz, E. A. Engels, G. M. Nogueras-González, V. Colón-López, M. Soto-Salgado, A. Vargas, M. Machin and M. S. Shiels | 2018 | Disparities in human papillomavirus–related cancer incidence and survival among human immunodeficiency virus–infected Hispanics living in the United States | Cancer | Excl - Incorrect population (othe than non vulnerable) |
|  | K. Thorsteinsson, M. Storgaard, T. L. Katzenstein, S. Ladelund, F. F. Ronsholt, I. S. Johansen, G. Pedersen, A. Gaardsting, L. N. Nielsen, J. Bonde and A. M. Lebech | 2018 | Prevalence of cervical, oral, and anal human papillomavirus infection in women living with HIV in Denmark - The SHADE cohort study | Journal of Clinical Virology | Excl - Incorrect outcome (Incidence-prevalence) |
|  | M. Van Zummeren, W. W. Kremer, M. C. Van Aardt, E. Breytenbach, K. L. Richter, L. Rozendaal, B. I. Witte, L. M. A. De Strooper, A. T. Hesselink, D. A. M. Heideman, P. J. F. Snijders, R. D. M. Steenbergen, G. Dreyer and C. Meijer | 2017 | Selection of women at risk for cervical cancer in an HIV-infected South African population | Aids | Excl - Incorrect outcome (Incidence-prevalence) |
|  | A. Diarra and H. Botha | 2017 | Invasive cervical cancer and human immunodeficiency virus (HIV) infection at Tygerberg Academic Hospital in the period 2003-2007: demographics and characteristics | Southern African Journal of Gynaecological Oncology | Excl - Incorrect population (othe than non vulnerable) |
|  | C. Oprea, I. Ianache, P. Ionescu, E. Ceausu and P. Calistru | 2017 | Malignancies in HIV-infected patients – Incidence and predictors of survival in a Romanian health care facility | Romanian Journal of Legal Medicine | Full text not found |
|  | A. Van Arsdale, D. Rosenbaum, G. Kaur, P. Pinto, D. Y. S. Kuo, R. Barrera, G. L. Goldberg and N. S. Nevadunsky | 2016 | Prevalence and factors associated with cognitive deficit in women with gynecologic malignancies | Gynecologic Oncology | Excl - Incorrect outcome (Incidence-prevalence) |
|  | J. S. Luque, Y. N. Tarasenko, J. N. Maupin, M. L. Alfonso, L. C. Watson, C. Reyes-Garcia and D. G. Ferris | 2015 | Cultural beliefs and understandings of cervical cancer among Mexican immigrant women in Southeast Georgia | J Immigr Minor Health | Excl - Incorrect outcome (Incidence-prevalence) |
|  | R. G. Ursu, M. Onofriescu, A. Luca, L. J. Prisecariu, S. O. Sălceanu, D. Nemescu and L. S. Iancu | 2015 | The Need for Cervical Cancer Control in HIV-Positive and HIV-Negative Women from Romania by Primary Prevention and by Early Detection Using Clinically Validated HPV/DNA Tests | PLoS One | Excl - Incorrect outcome (Incidence-prevalence) |
|  | J. L. Gradus, D. K. Farkas, E. Svensson, V. Ehrenstein, T. L. Lash, A. Milstein, N. Adler and H. T. Sørensen | 2015 | Posttraumatic stress disorder and cancer risk: A nationwide cohort study | European Journal of Epidemiology | Excl - Incorrect outcome (Incidence-prevalence) |
|  | D. M. S. de Brito, G. H. da Cunha, E. Gir, J. G. Freitas and M. T. G. Galvao | 2014 | Association between CD4+T-cell count, atypical squamous cells and Schiller's test in women with HIV/AIDS | Australian Journal of Advanced Nursing | Excl - Incorrect outcome (Incidence-prevalence) |
|  | S. K. Cesario, J. McFarlane, A. Nava, H. Gilroy and J. Maddoux | 2014 | Linking Cancer and Intimate Partner Violence: The Importance of Screening Women in the Oncology Setting | Clinical Journal of Oncology Nursing | Excl - Not vulnerable population |
|  | D. Abduljabbar, F. Al-Rawahi, F. Faqihi, M. Al-Khayat, M. Al-Mahmeed, M. Al-Khazali, N. Al-Sayed, S. AlGhaffar and F. AlNasir | 2014 | Types and risk factors of cervical cancer | Bahrain Medical Bulletin | Excl - Not vulnerable population |
|  | S. Kisely, E. Crowe and D. Lawrence | 2013 | Cancer-Related Mortality in People With Mental Illness | Jama Psychiatry | Excl - Incorrect outcome (Incidence-prevalence) |
|  | E. Billstrom, I. Sundstrom-Poromaa, K. Stalberg, A. Asplund and D. Hellberg | 2013 | Socioeconomic characteristics, housing conditions and criminal offences among women with cervical neoplasia | Acta Obstetricia Et Gynecologica Scandinavica | Excl - Incorrect population (othe than non vulnerable) |
|  | J. B. Zimmermmann, H. Gobbi, M. J. M. Alves, M. G. Quirino and V. H. Melo | 2012 | Langerhans cell density in cervical intraepithelial neoplasia associated with human papillomavirus infection in Hiv-infected and HIV-noninfected brazilian women | International Journal of Gynecological Cancer | Excl - Incorrect population (othe than non vulnerable) |
|  | D. H. Adler, L. Kakinami, T. Modisenyane, N. Tshabangu, L. Mohapi, G. De Bruyn, N. A. Martinson and T. Omar | 2012 | Increased regression and decreased incidence of human papillomavirus- related cervical lesions among HIV-infected women on HAART | AIDS | Excl - Incorrect population (othe than non vulnerable) |
|  | M. D. Zeier, M. H. Botha, F. H. Van Der Merwe, I. Eshun-Wilson, M. Van Schalkwyk, M. La Grange, D. Mason, M. Louw and J. B. Nachega | 2012 | Progression and persistence of low-grade cervical squamous intraepithelial lesions in women living with human immunodeficiency virus | Journal of Lower Genital Tract Disease | Excl - Incorrect population (othe than non vulnerable) |
|  | I. A. Binswanger, S. Mueller, C. B. Clark and K. L. Cropsey | 2011 | Risk factors for cervical cancer in criminal justice settings | Journal of Women's Health | Excl - Incorrect outcome (Incidence-prevalence) |
|  | J. T. McDonald and J. Neily | 2011 | Race, Immigrant Status, and Cancer Among Women in the United States | Journal of Immigrant and Minority Health | Excl - Not vulnerable population |
|  | S. Menon | 2011 | CERVICAL CANCER PREVENTION IN SETTINGS OF HIGH HIV PREVALENCE | Southern African Journal of Hiv Medicine | Excl - Incorrect publication type |
|  | A. M. McCarthy, T. Dumanovsky, K. Visvanathan, A. R. Kahn and M. J. Schymura | 2010 | Racial/ethnic and socioeconomic disparities in mortality among women diagnosed with cervical cancer in New York City, 1995-2006 | Cancer Causes and Control | Excl - Not vulnerable population |
|  | E. Pukkala, N. Malila and M. Hakama | 2010 | Socioeconomic differences in incidence of cervical cancer in Finland by cell type | Acta Oncologica | Excl - Not vulnerable population |
|  | B. Attner, T. Lithman, D. Noreen and H. Olsson | 2010 | Low cancer rates among patients with dementia in a population-based register study in Sweden | Dementia and Geriatric Cognitive Disorders | Excl - Incorrect population (othe than non vulnerable) |
|  | S. M. Dodd, D. B. Pereira, I. Marion, M. Andrasik, R. Rose, T. Simon, M. A. Fletcher, J. Lucci, K. Maher, M. J. O'Sullivan, J. Efantis-Potter and M. H. Antoni | 2009 | Depressive symptoms and cervical neoplasia in HIV+ low-income minority women with human papillomavirus infection | International Journal of Behavioral Medicine | Excl - Incorrect population (othe than non vulnerable) |
|  | S. Gander, V. Scholten, I. Osswald, M. Sutton and R. van Wylick | 2009 | Cervical Dysplasia and Associated Risk Factors in a Juvenile Detainee Population | Journal of Pediatric and Adolescent Gynecology | Excl - Incorrect population (othe than non vulnerable) |
|  | J. H. Wang, V. B. Sheppard, M. D. Schwartz, W. Liang and J. S. Mandelblatt | 2008 | Disparities in cervical cancer screening between Asian American and Non-Hispanic white women | Cancer Epidemiol Biomarkers Prev | Excl - Incorrect population (othe than non vulnerable) |
|  | J. H. Bates, B. M. Hofer and A. Parikh-Patel | 2008 | Cervical cancer incidence, mortality, and survival among Asian subgroups in California, 1990-2004 | Cancer | Excl - Incorrect population (othe than non vulnerable) |
|  | L. Denny, R. Boa, A. L. Willimson, B. Allan, D. Hardie, R. Stan and L. Myer | 2008 | Human papillomavirus infection and cervical disease in human immunodeficiency virus-1-infected women | Obstetrics and Gynecology | Excl - Incorrect population (othe than non vulnerable) |
|  | F. Russomano, A. Reis, M. J. Camargo, B. Grinsztejn and M. A. Tristão | 2008 | Recurrence of cervical intraepithelial neoplasia grades 2 or 3 in HIV-infected women treated by large loop excision of the transformation zone (LLETZ) | Sao Paulo Medical Journal | Excl - Incorrect population (othe than non vulnerable) |
|  | L. Stein, M. I. Urban, D. O'Connell, Q. Y. Xue, V. Beral, R. Newton, P. Ruff, B. Donde, M. Hale, M. Patel and F. Sitas | 2008 | The spectrum of human immunodeficiency virus-associated cancers in a South African black population: Results from a case-control study, 1995-2004 | International Journal of Cancer | Excl - Incorrect population (othe than non vulnerable) |
|  | L. A. Boardman, K. Cotter, C. Raker and S. Cu-Uvin | 2008 | Cervical intraepithelial neoplasia grade 2 or worse in human immunodeficiency virus-infected women with mildly abnormal cervical cytology | Obstetrics and Gynecology | Excl - Incorrect population (othe than non vulnerable) |
|  | V. B. Benard, C. J. Johnson, T. D. Thompson, K. B. Roland, M. L. Sue, V. Cokkinides, F. Tangka, N. A. Hawkins, H. Lawson and H. K. Weir | 2008 | Examining the association between socioeconomic status and potential human papillomavirus-associated cancers | Cancer | Excl - Incorrect population (othe than non vulnerable) |
|  | M. A. Van Der Aa, S. Siesling, M. W. Louwman, O. Visser, E. Pukkala and J. W. W. Coebergh | 2008 | Geographical relationships between sociodemographic factors and incidence of cervical cancer in the Netherlands 1989ĝ€"2003 | European Journal of Cancer Prevention | Excl - Incorrect outcome (Incidence-prevalence) |
|  | L. Mariani, A. Morrone, M. Preti, C. Shiroli, E. Tomao and S. Tomao | 2008 | Migrant women and cervical cancer: background of a prevention study | European Journal of Gynaecological Oncology | Excl - Incorrect publication type |
|  | F. Bonnet and G. Chêne | 2008 | Evolving epidemiology of malignancies in HIV | Current Opinion in Oncology | Excl - Incorrect publication type |
|  | K. B. Smith, J. S. Humphreys and M. G. A. Wilson | 2008 | Addressing the health disadvantage of rural populations: How does epidemiological evidence inform rural health policies and research? | Australian Journal of Rural Health | Excl - Incorrect publication type |
|  | J. A. McDougall, M. M. Madeleine, J. R. Daling and C. I. Li | 2007 | Racial and ethnic disparities in cervical cancer incidence rates in the United States, 1992-2003 | Cancer Causes Control | Excl - Not vulnerable population |
|  | L. Ho, V. Bos and A. E. Kunst | 2007 | Differences in cause-of-death patterns between the native Dutch and persons of Indonesian descent in the Netherlands | American Journal of Public Health | Excl - Incorrect outcome (Incidence-prevalence) |
|  | R. Mitsuyasu | 2007 | Malignancies in HIV: A growing problem | Current Opinion in Oncology | Excl - Incorrect publication type |
|  | C. D. O'Malley, S. J. Shema, L. S. Clarke, C. A. Clarke and C. I. Perkins | 2006 | Medicaid status and stage at diagnosis of cervical cancer | Am J Public Health | Excl - Incorrect population (othe than non vulnerable) |
|  | L. H. Oliveira, M. L. Rosa, C. R. Pereira, G. A. Vasconcelos, R. A. Silva, T. Z. Barrese, M. O. Carvalho, G. M. Abi, E. M. Rodrigues and S. M. Cavalcanti | 2006 | Human papillomavirus status and cervical abnormalities in women from public and private health care in Rio de Janeiro State, Brazil | Rev Inst Med Trop Sao Paulo | Excl - Not vulnerable population |
|  | H. Wu, K. Zhu, M. Shah, R. J. Lipnick and T. C. Kao | 2006 | BMI and cervical cancer screening among white, African-American, and Hispanic women in the United States | Obesity (Silver Spring) | Excl - Incorrect outcome (Incidence-prevalence) |
|  | S. S. Coughlin, J. King, T. B. Richards and D. U. Ekwueme | 2006 | Cervical cancer screening among women in metropolitan areas of the United States by individual-level and area-based measures of socioeconomic status, 2000 to 2002 | Cancer Epidemiology Biomarkers & Prevention | Excl - Not vulnerable population |
|  | W. Hluangdansakul, P. Phinchantra and C. Bowonwatanuwong | 2006 | Prevalence of SIL and SCCA in human immunodeficiency virus-seropositive women at anonymous clinic in Chonburi Hospital | Journal of the Medical Association of Thailand | Full text not found |
|  | M. Pineros, J. Ferlay and R. Murillo | 2006 | Cancer incidence estimates at the national and district levels in Colombia | Salud Publica De Mexico | Excl - Not vulnerable population |
|  | N. Finer | 2006 | Medical consequences of obesity | Medicine | Full text not found |
|  | D. Danso, F. Lyons and C. Bradbeer | 2006 | Cervical screening and management of cervical intraepithelial neoplasia in HIV-positive women | International Journal of STD and AIDS | Excl - Incorrect publication type |
|  | V. Ho, J. M. Yamal, E. N. Atkinson, K. Basen-Engquist, G. Tortolero-Luna and M. Follen | 2005 | Predictors of breast and cervical screening in Vietnamese women in Harris County, Houston, Texas | Cancer Nurs | Full text not found |
|  | J. Barry and N. Breen | 2005 | The importance of place of residence in predicting late-stage diagnosis of breast or cervical cancer | Health Place | Excl - Not vulnerable population |
|  | M. Bower, R. Lewis and J. Stebbing | 2005 | AIDS-related cancers. Part I: Kaposi's sarcoma and cervical cancer | Community Oncology | Excl - Incorrect publication type |
|  | S. C. Modesitt and J. R. van Nagell | 2005 | The impact of obesity on the incidence and treatment of Gynecologic cancers: A review | Obstetrical & Gynecological Survey | Excl - Incorrect publication type |
|  | No authors listed | 2004 | Stat bite: Cervical cancer mortality by ethnicity and socioeconomic area, 1995-1999 | J Natl Cancer Inst | Excl - Incorrect publication type |
|  | M. A. Moore and K. Tajima | 2004 | Cervical cancer in the asian pacific-epidemiology, screening and treatment | Asian Pac J Cancer Prev | Excl - Incorrect publication type |
|  | R. C. Yang, P. K. Mills and D. G. Riordan | 2004 | Cervical cancer among Hmong women in California, 1988 to 2000 | American Journal of Preventive Medicine | Excl - Incorrect population (othe than non-vulnerable) |
|  | S. O. Dalton, T. M. Laursen, P. B. Mortensen and C. Johansen | 2004 | Major life event - Diagnosis of schizophrenia in offspring and risk for cancer | British Journal of Cancer | Excl - Incorrect outcome (Incidence-prevalence) |
|  | E. Ng, R. Wilkins, M. F. K. Fung and J. M. Berthelot | 2004 | Cervical cancer mortality by neighbourhood income in urban Canada from 1971 to 1996 | Canadian Medical Association Journal | Excl - Incorrect outcome (Incidence-prevalence) |
|  | S. Chaturvedi, G. Radhakrishnan, R. A. Singh, N. G. Desai, A. Bhatia and R. Thakur | 2004 | Higher rate of benign cellular changes of uterine cervix in women with chronic mental illness | Tropical Doctor | Excl - Incorrect outcome (Incidence-prevalence) |
|  | T. O. Kirby, M. E. Allen, R. D. Alvarez, C. J. Hoesley and W. K. Huh | 2004 | High-risk human papillomavirus and cervical intraepithelial neoplasia at time of atypical squamous cells of undetermined significance cytologic results in a population with human immunodeficiency virus | Journal of Lower Genital Tract Disease | Excl - Incorrect population (othe than non vulnerable) |
|  | V. C. Prabhakaran and L. J. R. Brown | 2004 | Cervical schistosomiasis and neoplasia in HIV-infected patients | International Journal of Gynecological Pathology | Excl - Incorrect publication type |
|  | P. Paramsothy, A. Duerr, C. M. Heilig, S. Cu-Uvin, J. R. Anderson, P. Schuman and R. S. Klein | 2004 | Abnormal Vaginal Cytology in HIV-Infected and At-Risk Women after Hysterectomy | Journal of Acquired Immune Deficiency Syndromes | Excl - Incorrect population (othe than non vulnerable) |
|  | M. Iwasaki, C. P. Mameri, G. S. Hamada and S. Tsugane | 2004 | Cancer mortality among Japanese immigrants and their descendants in the State of São Paulo, Brazil, 1999-2001 | Japanese Journal of Clinical Oncology | Excl - Incorrect outcome (Incidence-prevalence) |
|  | G. K. Singh and B. A. Miller | 2004 | Health, life expectancy, and mortality patterns among immigrant populations in the United States | Canadian Journal of Public Health | Excl - Incorrect outcome (Incidence-prevalence) |
|  | Y. F. Matos, H. L. Costa and A. E. Faúndes | 2003 | Prevalence of cervical squamous intraepithelial lesions in women with HIV | Int J Gynaecol Obstet | Excl - Incorrect publication type |
|  | A. L. Coker, S. Bond, M. M. Madeleine, K. Luchok and L. Pirisi | 2003 | Psychosocial stress and cervical neoplasia risk | Psychosom Med | Excl - Incorrect population (othe than non vulnerable) |
|  | J. M. Palefsky | 2003 | Cervical human papillomavirus infection and cervical intraepithelial neoplasia in women positive for human immunodeficiency virus in the era of highly active antiretroviral therapy | Current Opinion in Oncology | Excl - Incorrect publication type |
|  | G. A. Bray | 2003 | Risks of obesity | Endocrinology and Metabolism Clinics of North America | Excl - Incorrect publication type |
|  | E. Stier | 2003 | Cervical neoplasia and the HIV-infected patient | Hematology/Oncology Clinics of North America | Excl - Incorrect publication type |
|  | L. S. Palacio-Mejía, G. Rangel-Gómez, M. Hernández-Avila and E. Lazcano-Ponce | 2003 | Cervical cancer, a disease of poverty: Mortality differences between urban and rural areas in Mexico | Salud Publica de Mexico | Excl - Incorrect outcome (Incidence-prevalence) |
|  | P. Pautier, P. Morice and R. De Crevoisier | 2003 | HIV and uterine cervical cancer | Bulletin du Cancer | Excl - Incorrect publication type |
|  | D. Bradshaw, M. Schneider, R. Dorrington, D. E. Bourne and R. Laubscher | 2002 | South African cause-of-death profile in transition - 1996 and future trends | South African Medical Journal | Excl - Incorrect outcome (Incidence-prevalence) |
|  | K. Ell, B. Vourlekis, L. Muderspach, J. Nissly, D. Padgett, D. Pineda, O. Sarabia and P. J. Lee | 2002 | Abnormal cervical screen follow-up among low-income Latinas: Project SAFe | Journal of Womens Health & Gender-Based Medicine | Full text not found |
|  | J. Sasadeusz, H. Kelly, J. Szer, A. P. Schwarer, H. Mitchell and A. Grigg | 2001 | Abnormal cervical cytology in bone marrow transplant recipients | Bone Marrow Transplant | Excl - Incorrect population (othe than non vulnerable) |
|  | R. A. Vilchez, C. A. Kozinetz and J. S. Butel | 2001 | The changing incidence of four AIDS-related malignancies in a large urban center | AIDS Patient Care STDS | Excl - Incorrect publication type |
|  | A. Del Mistro and L. C. Bianchi | 2001 | HPV-related neoplasias in HIV-infected individuals | European Journal of Cancer | Excl - Incorrect publication type |
|  | C. J. Bradley, C. W. Given and C. Roberts | 2001 | Disparities in cancer diagnosis and survival | Cancer | Excl - Not vulnerable population |
|  | M. Moodley, J. Moodley and I. Kleinschmidt | 2001 | Invasive cervical cancer and human immunodeficiency virus (HIV) infection: A South African perspective | International Journal of Gynecological Cancer | Excl - Incorrect population (othe than non vulnerable) |
|  | B. J. C. Middelkoop, H. W. A. Struben, I. Burger and J. M. Vroom-Jongerden | 2001 | Urban cause-specific socioeconomic mortality differences. Which causes of death contribute most? | International Journal of Epidemiology | Excl - Incorrect outcome (Incidence-prevalence) |
|  | M. Soler, S. De Sanjose, J. M. Ribera, L. Dal Maso and J. Casabona | 2001 | Epidemiology of AIDS-Associated malignances | AIDS Reviews | Excl - Incorrect publication type |
|  | J. S. Colt, L. Stallones, L. L. Cameron, M. Dosemeci and S. H. Zahm | 2001 | Proportionate mortality among US migrant and seasonal farmworkers in twenty-four states | American Journal of Industrial Medicine | Excl - Incorrect outcome (Incidence-prevalence) |
|  | K. Jennings-Dozier and D. Lawrence | 2000 | Sociodemographic predictors of adherence to annual cervical cancer screening in minority women | Cancer Nurs | Excl - Incorrect outcome (Incidence-prevalence) |
|  | E. D. O'Brien, R. S. Bailie and P. L. Jelfs | 2000 | Cervical cancer mortality in Australia: contrasting risk by Aboriginality, age and rurality | Int J Epidemiol | Excl - Incorrect outcome (Incidence-prevalence) |
|  | A. B. Moscicki, J. H. Ellenberg, S. H. Vermund, C. A. Holland, T. Darragh, P. A. Crowley-Nowick, L. Levin and C. M. Wilson | 2000 | Prevalence of and risks for cervical human papillomavirus infection and squamous intraepithelial lesions in adolescent girls - Impact of infection with human immunodeficiency virus | Archives of Pediatrics & Adolescent Medicine | Excl - Not vulnerable population |
|  | M. C. Delmas, C. Larsen, B. Van Benthem, F. F. Hamers, C. Bergeron, J. D. Poveda, B. Anzén, A. Van Den Hoek, F. Meier, J. M. Peña, H. Savonius, D. Sperandeo, B. Suligoi, P. Vernazza, J. B. Brunet and I. De Vincenzi | 2000 | Cervical squamous intraepithelial lesions in HIV-infected women: Prevalence, incidence and regression | AIDS | Excl - Incorrect publication type |
|  | P. Lomalisa, T. Smith and F. Guidozzi | 2000 | Human immunodeficiency virus infection and invasive cervical cancer in South Africa | Gynecologic Oncology | Excl - Not vulnerable population |
|  | F. Sitas, R. Pacella-Norman, H. Carrara, M. Patel, P. Ruff, R. Sur, U. Jentsch, M. Hale, P. Rowji, D. Saffer, M. Connor, D. Bull, R. Newton and V. Beral | 2000 | The spectrum of HIV-1 related cancers in South Africa | International Journal of Cancer | Excl - Incorrect outcome (Incidence-prevalence) |
|  | M. Schiff, T. M. Becker, M. Masuk, L. Van Asselt-King, C. M. Wheeler, K. K. Altobelli, C. Q. North and A. J. Nahmias | 2000 | Risk factors for cervical intraepithelial neoplasia in Southwestern American Indian women | American Journal of Epidemiology | Excl - Not vulnerable population |
|  | E. J. Fordyce, Z. Wang, A. R. Kahn, B. K. Gallagher, I. Merlos, S. Ly, M. Schymura and M. A. Chiasson | 2000 | Risk of cancer among women with AIDS in New York City | AIDS and Public Policy Journal | Full text not found |
|  | L. Goodman, V. Croke, A. Rodman and M. K. Alexander | 1999 | Cervical dysplasia in women with HIV | Nurse Pract | Excl - Incorrect publication type |
|  | W. R. Brewster, P. J. DiSaia, B. J. Monk, A. Ziogas, S. D. Yamada and H. Anton-Culver | 1999 | Young age as a prognostic factor in cervical cancer: Results of a population-based study | American Journal of Obstetrics and Gynecology | Excl - Incorrect population (othe than non vulnerable) |
|  | M. McCredie, S. Williams and M. Coates | 1999 | Cancer mortality in migrants from the British Isles and continental Europe to New South Wales, Australia, 1975-1995 | International Journal of Cancer | Excl - Incorrect outcome (Incidence-prevalence) |
|  | C. Hankins, F. Coutlee, N. Lapointe, P. Simard, T. Tran, J. Samson, L. Hum and H. I. V. S. G. Canadian Women's | 1999 | Prevalence of risk factors associated with human papillomavirus infection in women living with HIV | Canadian Medical Association Journal | Excl - Incorrect outcome (Incidence-prevalence) |
|  | J. Savard, S. M. Miller, M. Mills, A. O'Leary, H. Harding, S. D. Douglas, C. E. Mangan, R. Belch and A. Winokur | 1999 | Association between subjective sleep quality and depression on immunocompetence in low-income women at risk for cervical cancer | Psychosomatic Medicine | Excl - Incorrect population (othe than non vulnerable) |
|  | I. Heard and M. D. Kazatchkine | 1999 | Regression of cervical lesions in HIV-infected women receiving HAART | AIDS Reader | Full text not found |
|  | P. Michelozzi, C. A. Perucci, F. Forastiere, D. Fusco, C. Ancona and V. DelL'Orco | 1999 | Inequality in health: Socioeconomic differentials in mortality in Rome, 1990-95 | Journal of Epidemiology and Community Health | Excl - Incorrect outcome (Incidence-prevalence) |
|  | J. S. Mandelblatt, P. Kanetsky, L. Eggert and K. Gold | 1999 | Is HIV infection a cofactor for cervical squamous cell neoplasia? | Cancer Epidemiology Biomarkers and Prevention | Excl - Incorrect publication type |
|  | P. A. Kanetsky, M. D. Gammon, J. Mandelblatt, Z. F. Zhang, E. Ramsey, T. C. Wright, Jr., L. Thomas, S. Matseoane, N. Lazaro, H. T. Felton, R. K. Sachdev, R. M. Richart and J. P. Curtin | 1998 | Cigarette smoking and cervical dysplasia among non-Hispanic black women | Cancer Detect Prev | Excl - Incorrect population (othe than non vulnerable) |
|  | A. A. Martín, Y. H. Galán, A. J. Rodríguez, M. Graupera, P. Lorenzo-Luaces, L. M. Fernández, R. Camacho and M. Lezcano | 1998 | The Cuban National Cancer Registry: 1986-1990 | Eur J Epidemiol | Excl - Not vulnerable population |
|  | V. Braun and N. Gavey | 1998 | Exploring the possibility of sexual-behavioural primary prevention interventions for cervical cancer | Aust N Z J Public Health | Excl - Incorrect publication type |
|  | R. G. Fruchter, M. Maiman, C. D. Arrastia, R. Matthews, E. J. Gates and K. Holcomb | 1998 | Is HIV infection a risk factor for advanced cervical cancer? | Journal of Acquired Immune Deficiency Syndromes and Human Retrovirology | Excl - Not vulnerable population |
|  | P. D. Abercrombie and A. P. Korn | 1998 | Vulvar intraepithelial neoplasia in women with HIV | Aids Patient Care and Stds | Excl - Incorrect publication type |
|  | C. Smith, S. Lilly, K. P. Mann, E. Livingston, S. Myers, H. K. Lyerly and G. D. Miralles | 1998 | AIDS-related malignancies | Annals of Medicine | Excl - Incorrect publication type |
|  | S. K. Kjaer | 1998 | Risk factors for cervical neoplasia in Denmark | APMIS, Supplement | Excl - Incorrect population (othe than non vulnerable) |
|  | K. L. Margolis, N. Lurie, P. G. McGovern, M. Tyrrell and J. S. Slater | 1998 | Increasing breast and cervical cancer screening in low-income women | Journal of general internal medicine | Excl - Incorrect outcome (Incidence-prevalence) |
|  | T. Alterman, C. Burnett, L. Peipins, N. Lalich and W. Halperin | 1997 | Occupation and cervical cancer: an opportunity for prevention | J Womens Health | Excl - Incorrect outcome (Incidence-prevalence) |
|  | S. de Sanjosé, F. X. Bosch, N. Muñoz and K. Shah | 1997 | Social differences in sexual behaviour and cervical cancer | IARC Sci Publ | Excl - Incorrect publication type |
|  | F. Sitas, W. R. Bezwoda, V. Levin, P. Ruff, M. C. Kew, M. J. Hale, H. Carrara, V. Beral, G. Fleming, R. Odes and A. Weaving | 1997 | Association between human immunodeficiency virus type 1 infection and cancer in the black population of Johannesburg and Soweto, South Africa | British Journal of Cancer | Excl - Incorrect outcome (Incidence-prevalence) |
|  | D. M. Parkin and J. Iscovich | 1997 | Risk of cancer in migrants and their descendants in Israel .2. Carcinomas and germ-cell tumours | International Journal of Cancer | Excl - Incorrect population (othe than non vulnerable) |
|  | M. Maiman, R. G. Fruchter, M. Clark, C. D. Arrastia, R. Matthews and E. J. Gates | 1997 | Cervical cancer as an AIDS-defining illness | Obstetrics and Gynecology | Excl - Incorrect population (othe than non vulnerable) |
|  | S. de Sanjosé, F. X. Bosch, N. Muñoz, L. Tafur, M. Gili, I. Izarzugaza, A. Izquierdo, C. Navarro, A. Vergara, M. T. Muñoz, N. Ascunce and K. V. Shah | 1996 | Socioeconomic differences in cervical cancer: two case-control studies in Colombia and Spain | Am J Public Health | Excl - Incorrect population (othe than non vulnerable) |
|  | D. B. Thomas, R. M. Ray, T. Pardthaisong, S. Chutivongse, S. Koetsawang, S. Silpisornkosol, P. Virutamasen, W. M. Christopherson, J. L. Melnick, O. Meirik, T. M. Farley and G. Riotton | 1996 | Prostitution, condom use, and invasive squamous cell cervical cancer in Thailand | Am J Epidemiol | Excl - Incorrect population (othe than non vulnerable) |
|  | J. Cuzick, P. Sasieni and A. Singer | 1996 | Risk factors for invasive cervix cancer in young women | Eur J Cancer | Excl - Not vulnerable population |
|  | C. Bouchardy, D. M. Parkin, P. Wanner and M. Khlat | 1996 | Cancer mortality among North African migrants in France | International Journal of Epidemiology | Excl - Incorrect outcome (Incidence-prevalence) |
|  | S. deSanjose, F. X. Bosch, N. Munoz, L. Tafur, M. Gili, I. Izarzugaza, A. Izquierdo, C. Navarro, A. Vergara, M. T. Munoz, N. Ascunce and K. V. Shah | 1996 | Socioeconomic differences in cervical cancer: Two case-control studies in Colombia and Spain | American Journal of Public Health | Excl - Not vulnerable population |
|  | M. Boccalon, U. Tirelli, F. Sopracordevole and E. Vaccher | 1996 | Intra-epithelial and invasive cervical neoplasia during HIV infection | European Journal of Cancer | Excl - Incorrect publication type |
|  | F. Sopracordevole, E. Campagnutta, A. Parin, E. Vaccher, R. Volpe and C. Scarabelli | 1996 | Squamous intraepithelial cervical lesions in human immunodeficiency virus-seropositive women | Journal of Reproductive Medicine for the Obstetrician and Gynecologist | Full text not found |
|  | R. J. Biggar and C. S. Rabkin | 1996 | The epidemiology of AIDS-related neoplasms | Hematology/Oncology Clinics of North America | Excl - Incorrect publication type |
|  | W. W. Thoms, E. R. Unger, P. R. Johnson, C. O. Spann, S. H. Hunter, R. Smith, I. R. Horowitz, J. P. Icenogle, S. D. Vernon and W. C. Reeves | 1995 | Cervical cancer survival in a high risk urban population | Cancer | Excl - Incorrect population (othe than non vulnerable) |
|  | K. M. Stone, A. Zaidi, L. Rosero-Bixby, M. W. Oberle, G. Reynolds, S. Larsen, A. J. Nahmias, F. K. Lee, J. Schachter and M. E. Guinan | 1995 | Sexual behavior, sexually transmitted diseases, and risk of cervical cancer | Epidemiology | Excl - Incorrect population (othe than non vulnerable) |
|  | A. Bar-Am, J. Niv, H. Yavetz, A. J. Jaffa and R. M. Peyser | 1995 | Are Israeli women in a low risk group for developing squamous cell carcinoma of the uterine cervix? | Acta Obstet Gynecol Scand | Excl - Incorrect population (othe than non vulnerable) |
|  | M. Khlat | 1995 | Cancer in Mediterranean migrants--based on studies in France and Australia | Cancer Causes Control | Excl - Incorrect outcome (Incidence-prevalence) |
|  | J. M. Borras, V. Sanchez, V. Moreno, A. Izquierdo and P. Viladiu | 1995 | CERVICAL-CANCER - INCIDENCE AND SURVIVAL IN MIGRANTS WITHIN SPAIN | Journal of Epidemiology and Community Health | Excl - Not vulnerable population |
|  | K. M. Gorey and J. E. Vena | 1995 | THE ASSOCIATION OF NEAR POVERTY STATUS WITH CANCER INCIDENCE AMONG BLACK-AND-WHITE ADULTS | Journal of Community Health | Excl - Incorrect outcome (Incidence-prevalence) |
|  | J. Palefsky | 1995 | Human papillomavirus-associated malignancies in HIV-positive men and women | Current Opinion in Oncology | Excl - Incorrect publication type |
|  | M. Khlat | 1995 | CANCER IN MEDITERRANEAN MIGRANTS-BASED ON STUDIES IN FRANCE AND AUSTRALIA | Cancer Causes & Control | Excl - Incorrect outcome (Incidence-prevalence) |
|  | C. S. Rabkin and F. Yellin | 1994 | Cancer incidence in a population with a high prevalence of infection with human immunodeficiency virus type 1 | Journal of the National Cancer Institute | Excl - Incorrect population (othe than non vulnerable) |
|  | E. L. Matos, D. I. Loria and M. Vilensky | 1994 | Cancer mortality and poverty in Argentina: A geographical correlation study | Cancer Epidemiology Biomarkers and Prevention | Excl - Incorrect outcome (Incidence-prevalence) |
|  | J. Tyczynski, W. Tarkowski, D. M. Parkin and W. Zatonski | 1994 | CANCER MORTALITY AMONG POLISH MIGRANTS TO AUSTRALIA | European Journal of Cancer | Excl - Incorrect outcome (Incidence-prevalence) |
|  | C. Bouchardy, D. M. Parkin and M. Khlat | 1994 | CANCER MORTALITY AMONG CHINESE AND SOUTH-EAST ASIAN MIGRANTS IN FRANCE | International Journal of Cancer | Excl - Incorrect outcome (Incidence-prevalence) |
|  | M. Maiman, R. G. Fruchter, E. Serur, P. A. Levine, C. D. Arrastia and A. Sedlis | 1993 | Recurrent cervical intraepithelial neoplasia in human immunodeficiency virus-seropositive women | Obstet Gynecol | Excl - Incorrect population (othe than non vulnerable) |
|  | A. E. Grulich, A. J. Swerdlow, J. Head and M. G. Marmot | 1992 | Cancer mortality in African and Caribbean migrants to England and Wales | British Journal of Cancer | Excl - Incorrect outcome (Incidence-prevalence) |
|  | D. Shai | 1991 | CANCER MORTALITY IN CUBA AND AMONG THE CUBAN-BORN IN THE UNITED-STATES - 1979-81 | Public Health Reports | Excl - Incorrect outcome (Incidence-prevalence) |
|  | G. N. Zhang and A. Q. Xu | 1990 | [Conditional logistic regression analysis and path analysis of risk factors of cervical cancer] | Zhonghua Liu Xing Bing Xue Za Zhi | Excl - Incorrect population (othe than non vulnerable) |
|  | I. Rosenwaike | 1984 | Cancer mortality among Puerto Rican-born residents in New York City | American Journal of Epidemiology | Excl - Incorrect outcome (Incidence-prevalence) |
|  | H. Abraham, L. Sluggett, D. Huber and R. A. Olson | 2023 | Population-Based Differences in Cancer Incidence between Immigrants and Non-Immigrants in Canada from 1992-2015 | International Journal of Radiation Oncology Biology Physics | Excl - Incorrect publication type |
|  | S. N. Adebamowo, B. Befano, L. C. Cheung, A. C. Rodriguez, M. Demarco, G. Rydzak, X. Chen, C. Porras, R. Herrero, J. J. Kim and et al. | 2022 | Different human papillomavirus types share early natural history transitions in immunocompetent women | International journal of cancer | Excl - Incorrect outcome (Incidence-prevalence) |
|  | K. Ando, A. Shimomura, K. Watanabe, T. Kunihisa, K. Teruya and C. Shimizu | 2022 | Malignant diseases diagnosed in people living with HIV in Japan | Annals of Oncology | Excl - Incorrect publication type |
|  | J. Bolon, A. Samson, N. Irwin, L. Murray, L. Mbodi, S. Stacey, N. Aikman, L. Moonsamy and J. Zamparini | 2023 | An audit of adherence to cervical cancer screening guidelines in a tertiary-level HIV clinic | Southern African Journal of HIV Medicine | Excl - Incorrect outcome (Incidence-prevalence) |
|  | M. M. Brackney, D. M. Weinberger, K. Higgins, J. Meek and L. M. Niccolai | 2022 | Trends in Precancerous Cervical Lesions by Area-Based Measures of Poverty, Race, and Ethnicity, Connecticut, 2008-2018 | Public Health Rep | Excl - Incorrect outcome (Incidence-prevalence) |
|  | S. Chattopadhyay, N. Mitra, S. Das, K. K. Patra, K. P. Madhwani and S. Mitra | 2023 | A comparative study of Pap smear findings among HIV seropositive women and seronegative Population | Journal of Cardiovascular Disease Research | Excl - not high income country |
|  | Y. Chen, M. Song, Y. Zhang, X. Yu, S. Zou, P. Zhu, Y. Zhou and H. Yang | 2023 | The temporal trend of women's cancer in Changle, China and a migrant epidemiological study | Frontiers in Oncology | Excl - Incorrect outcome (Incidence-prevalence) |
|  | C. M. Cohen, N. Wentzensen, P. E. Castle, M. Schiffman, R. Zuna, R. C. Arend and M. A. Clarke | 2023 | Racial and Ethnic Disparities in Cervical Cancer Incidence, Survival, and Mortality by Histologic Subtype | Journal of Clinical Oncology | Excl - Incorrect outcome (Incidence-prevalence) |
|  | M. R. Enden, K. Møen, J. Igland and E. Diaz | 2024 | Trends in cervical cancer screening in Norway 2012-2017: a comparison study of non-immigrant and immigrant women | Scand J Public Health | Excl - Incorrect outcome (Incidence-prevalence) |
|  | M. Fujiwara, Y. Yamada, T. Shimazu, N. Nakaya, S. Hinotsu, M. Fujimori, Y. Uchitomi and M. Inagaki | 2023 | Increasing disparities in cancer screening among people with severe mental illness during the COVID-19 pandemic | Schizophrenia Research | Excl - Incorrect publication type |
|  | C. Gilles, S. Rozenberg, F. Buxant, Y. Manigart, R. de Wind, K. Vanden Houte, D. Vandenbroeck, M. Delforge and D. Konopnicki | 2022 | HPV genotyping in biopsies of HSIL and invasive cervical cancers in women living with HIV: A cohort- and a nested -case control study | Vaccine | Excl - Incorrect outcome (Incidence-prevalence) |
|  | R. Gupta, S. Hussain, R. Hariprasad, K. Dhanasekaran, S. Verma, V. Agarwal, Sandeep, S. Parveen, A. Kaur, C. P. Verma, Amita, R. Dwivedi, S. Singh and S. Gupta | 2022 | High Prevalence of Cervical High-Grade Lesions and High-Risk Human Papillomavirus Infections in Women Living with HIV: A Case for Prioritizing Cervical Screening in This Vulnerable Group | Acta Cytol | Excl - not high income country |
|  | L. J. McCormick, S. Gutreuter, O. Adeoye, S. X. Alger, C. Amado, Z. Bay, C. M. Chirwa, O. Chituwo, D. Correia, M. Deus, E. Dirlikov, T. Efuntoye, L. Gunde, A. Kabaghe, J. N. Kalamya, C. Lorenzoni, D. Magesa, C. Mate, T. Mulokoshi, J. C. Ninsiima, M. Nyangasi, P. Nyika, M. Pasipamire, M. Ssali, F. Tefera, L. A. Torre, M. Urso, R. Wandira, B. Zemburuka and M. Montandon | 2023 | Cervical Cancer Screening Positivity Among Women Living With HIV in CDC-PEPFAR Programs 2018-2022 | Jaids-Journal of Acquired Immune Deficiency Syndromes | Excl - not high income country |
|  | R. S. Mkuu, J. M. Hall, Z. Galochkina, H. D. Cho, S. A. S. Staras, J. H. Lee, Y. Guo, C. Chakrabarti, S. B. Barrow, S. Ortega, D. M. Avery, J. Higginbotham, J. Lockhart and E. A. Shenkman | 2023 | Does the Intersectionality of Race/Ethnicity and Type 2 Diabetes Increase the Odds of a Cervical Cancer Diagnosis? A Nested Case-Control Study of a Florida Statewide Multisite EHR Database | Healthcare | Excl - Incorrect outcome (Incidence-prevalence) |
|  | W. Ng'ambi and C. Zyambo | 2023 | Cervical cancer care cascade among women living with human immunodeficiency virus in 13 sub-Saharan Africa countries between 2019 and 2021: An ecological analysis of PEPFAR Panorama cervical cancer program data | International Journal of Noncommunicable Diseases | Excl - not high income country |
|  | C. A. Nkwonta, J. Zhang, S. Chen, S. Weissman, B. Olatosi and X. Li | 2023 | Prevalence and trend of AIDS-defining cancers and non-AIDS-defining cancers and their association with antiretroviral therapy among people living with HIV in South Carolina: a population-based cohort study | AIDS Care - Psychological and Socio-Medical Aspects of AIDS/HIV | Excl - Incorrect outcome (Incidence-prevalence) |
|  | M. L. Saasa-Modise, J. M. Musonda, J. Sikwese-Musonda, N. J. Maseko, L. Hlophe and G. Kubeka | 2022 | Cervical cancer screening in women living with HIV attending primary care clinics in a health district, South Africa: a descriptive cross-sectional study | Pan African Medical Journal | Excl - Incorrect outcome (Incidence-prevalence) |
|  | R. B. P. Thangappah, G. Sureshbabu, S. V. Desu and V. Subramanian | 2023 | A Retrospective Case Control Study to Evaluate the Frequency of Pap Smear Abnormalities among HIV-seropositive and HIV-seronegative Women | Journal of South Asian Federation of Obstetrics and Gynaecology | Excl - not high income country |
|  | D. R. Withrow and S. L. Gomez | 2023 | Cancer Incidence by Race and Immigration Status in Canada: Value of Enhanced Sociodemographic Data for Disease Surveillance | Cancer Epidemiology Biomarkers and Prevention | Excl - Incorrect publication type |
|  | T. T. Xu, X. L. Yang, X. N. He and J. Wu | 2023 | The Study on Cervical Cancer Burden in 127 Countries and Its Socioeconomic Influence Factors | Journal of Epidemiology and Global Health | Excl - Not vulnerable population |
|  | Kaneko N, Nishino Y, Ito Y, Nakaya T, Kanemura S | 2022 | Association of Socioeconomic Status Assessed by Areal Deprivation With Cancer Incidence and Detection by Screening in Miyagi, Japan Between 2005 and 2010 | Journal of Epidemiology | Excl - Incorrect outcome (Incidence-prevalence) |

**Appendix 4: List of upper-middle and high-income countries according to the OECD classification[[1]](#footnote-1)**

| **Economy** | **Code** | **Region** | **Income group** |
| --- | --- | --- | --- |
| Aruba | ABW | Latin America & Caribbean | High income |
| Andorra | AND | Europe & Central Asia | High income |
| United Arab Emirates | ARE | Middle East & North Africa | High income |
| Antigua and Barbuda | ATG | Latin America & Caribbean | High income |
| Australia | AUS | East Asia & Pacific | High income |
| Austria | AUT | Europe & Central Asia | High income |
| Belgium | BEL | Europe & Central Asia | High income |
| Bahrain | BHR | Middle East & North Africa | High income |
| Bahamas, The | BHS | Latin America & Caribbean | High income |
| Bermuda | BMU | North America | High income |
| Barbados | BRB | Latin America & Caribbean | High income |
| Brunei Darussalam | BRN | East Asia & Pacific | High income |
| Canada | CAN | North America | High income |
| Switzerland | CHE | Europe & Central Asia | High income |
| Channel Islands | CHI | Europe & Central Asia | High income |
| Chile | CHL | Latin America & Caribbean | High income |
| Curaçao | CUW | Latin America & Caribbean | High income |
| Cayman Islands | CYM | Latin America & Caribbean | High income |
| Cyprus | CYP | Europe & Central Asia | High income |
| Czech Republic | CZE | Europe & Central Asia | High income |
| Germany | DEU | Europe & Central Asia | High income |
| Denmark | DNK | Europe & Central Asia | High income |
| Spain | ESP | Europe & Central Asia | High income |
| Estonia | EST | Europe & Central Asia | High income |
| Finland | FIN | Europe & Central Asia | High income |
| France | FRA | Europe & Central Asia | High income |
| Faroe Islands | FRO | Europe & Central Asia | High income |
| United Kingdom | GBR | Europe & Central Asia | High income |
| Gibraltar | GIB | Europe & Central Asia | High income |
| Greece | GRC | Europe & Central Asia | High income |
| Greenland | GRL | Europe & Central Asia | High income |
| Guam | GUM | East Asia & Pacific | High income |
| Hong Kong SAR, China | HKG | East Asia & Pacific | High income |
| Croatia | HRV | Europe & Central Asia | High income |
| Hungary | HUN | Europe & Central Asia | High income |
| Isle of Man | IMN | Europe & Central Asia | High income |
| Ireland | IRL | Europe & Central Asia | High income |
| Iceland | ISL | Europe & Central Asia | High income |
| Israel | ISR | Middle East & North Africa | High income |
| Italy | ITA | Europe & Central Asia | High income |
| Japan | JPN | East Asia & Pacific | High income |
| St. Kitts and Nevis | KNA | Latin America & Caribbean | High income |
| Korea, Rep. | KOR | East Asia & Pacific | High income |
| Kuwait | KWT | Middle East & North Africa | High income |
| Liechtenstein | LIE | Europe & Central Asia | High income |
| Lithuania | LTU | Europe & Central Asia | High income |
| Luxembourg | LUX | Europe & Central Asia | High income |
| Latvia | LVA | Europe & Central Asia | High income |
| Macao SAR, China | MAC | East Asia & Pacific | High income |
| St. Martin (French part) | MAF | Latin America & Caribbean | High income |
| Monaco | MCO | Europe & Central Asia | High income |
| Malta | MLT | Middle East & North Africa | High income |
| Northern Mariana Islands | MNP | East Asia & Pacific | High income |
| New Caledonia | NCL | East Asia & Pacific | High income |
| Netherlands | NLD | Europe & Central Asia | High income |
| Norway | NOR | Europe & Central Asia | High income |
| Nauru | NRU | East Asia & Pacific | High income |
| New Zealand | NZL | East Asia & Pacific | High income |
| Oman | OMN | Middle East & North Africa | High income |
| Panama | PAN | Latin America & Caribbean | High income |
| Poland | POL | Europe & Central Asia | High income |
| Puerto Rico | PRI | Latin America & Caribbean | High income |
| Portugal | PRT | Europe & Central Asia | High income |
| French Polynesia | PYF | East Asia & Pacific | High income |
| Qatar | QAT | Middle East & North Africa | High income |
| Romania | ROU | Europe & Central Asia | High income |
| Saudi Arabia | SAU | Middle East & North Africa | High income |
| Singapore | SGP | East Asia & Pacific | High income |
| San Marino | SMR | Europe & Central Asia | High income |
| Slovak Republic | SVK | Europe & Central Asia | High income |
| Slovenia | SVN | Europe & Central Asia | High income |
| Sweden | SWE | Europe & Central Asia | High income |
| Sint Maarten (Dutch part) | SXM | Latin America & Caribbean | High income |
| Seychelles | SYC | Sub-Saharan Africa | High income |
| Turks and Caicos Islands | TCA | Latin America & Caribbean | High income |
| Trinidad and Tobago | TTO | Latin America & Caribbean | High income |
| Taiwan, China | TWN | East Asia & Pacific | High income |
| Uruguay | URY | Latin America & Caribbean | High income |
| United States | USA | North America | High income |
| British Virgin Islands | VGB | Latin America & Caribbean | High income |
| Virgin Islands (U.S.) | VIR | Latin America & Caribbean | High income |
| Albania | ALB | Europe & Central Asia | Upper middle income |
| Argentina | ARG | Latin America & Caribbean | Upper middle income |
| Armenia | ARM | Europe & Central Asia | Upper middle income |
| American Samoa | ASM | East Asia & Pacific | Upper middle income |
| Azerbaijan | AZE | Europe & Central Asia | Upper middle income |
| Bulgaria | BGR | Europe & Central Asia | Upper middle income |
| Bosnia and Herzegovina | BIH | Europe & Central Asia | Upper middle income |
| Belarus | BLR | Europe & Central Asia | Upper middle income |
| Belize | BLZ | Latin America & Caribbean | Upper middle income |
| Brazil | BRA | Latin America & Caribbean | Upper middle income |
| Botswana | BWA | Sub-Saharan Africa | Upper middle income |
| China | CHN | East Asia & Pacific | Upper middle income |
| Colombia | COL | Latin America & Caribbean | Upper middle income |
| Costa Rica | CRI | Latin America & Caribbean | Upper middle income |
| Cuba | CUB | Latin America & Caribbean | Upper middle income |
| Dominica | DMA | Latin America & Caribbean | Upper middle income |
| Dominican Republic | DOM | Latin America & Caribbean | Upper middle income |
| Ecuador | ECU | Latin America & Caribbean | Upper middle income |
| Fiji | FJI | East Asia & Pacific | Upper middle income |
| Gabon | GAB | Sub-Saharan Africa | Upper middle income |
| Georgia | GEO | Europe & Central Asia | Upper middle income |
| Equatorial Guinea | GNQ | Sub-Saharan Africa | Upper middle income |
| Grenada | GRD | Latin America & Caribbean | Upper middle income |
| Guatemala | GTM | Latin America & Caribbean | Upper middle income |
| Guyana | GUY | Latin America & Caribbean | Upper middle income |
| Iraq | IRQ | Middle East & North Africa | Upper middle income |
| Jamaica | JAM | Latin America & Caribbean | Upper middle income |
| Jordan | JOR | Middle East & North Africa | Upper middle income |
| Kazakhstan | KAZ | Europe & Central Asia | Upper middle income |
| Libya | LBY | Middle East & North Africa | Upper middle income |
| St. Lucia | LCA | Latin America & Caribbean | Upper middle income |
| Moldova | MDA | Europe & Central Asia | Upper middle income |
| Maldives | MDV | South Asia | Upper middle income |
| Mexico | MEX | Latin America & Caribbean | Upper middle income |
| Marshall Islands | MHL | East Asia & Pacific | Upper middle income |
| North Macedonia | MKD | Europe & Central Asia | Upper middle income |
| Montenegro | MNE | Europe & Central Asia | Upper middle income |
| Mauritius | MUS | Sub-Saharan Africa | Upper middle income |
| Malaysia | MYS | East Asia & Pacific | Upper middle income |
| Namibia | NAM | Sub-Saharan Africa | Upper middle income |
| Peru | PER | Latin America & Caribbean | Upper middle income |
| Palau | PLW | East Asia & Pacific | Upper middle income |
| Paraguay | PRY | Latin America & Caribbean | Upper middle income |
| Russian Federation | RUS | Europe & Central Asia | Upper middle income |
| Serbia | SRB | Europe & Central Asia | Upper middle income |
| Suriname | SUR | Latin America & Caribbean | Upper middle income |
| Thailand | THA | East Asia & Pacific | Upper middle income |
| Turkmenistan | TKM | Europe & Central Asia | Upper middle income |
| Tonga | TON | East Asia & Pacific | Upper middle income |
| Türkiye | TUR | Europe & Central Asia | Upper middle income |
| Tuvalu | TUV | East Asia & Pacific | Upper middle income |
| St. Vincent and the Grenadines | VCT | Latin America & Caribbean | Upper middle income |
| Kosovo | XKX | Europe & Central Asia | Upper middle income |
| South Africa | ZAF | Sub-Saharan Africa | Upper middle income |

**Appendix 5: Flowchart**

**Identification of studies via databases and registers**

Records removed *before screening*:

Duplicate records removed by Endnote® (n = **1458**)

Records identified from Databases (n = **11540**)

**Identification**

Records excluded on title/abstract

(n = 9652)

Records screened (title/abstract)

(n = 10082)

Full text articled excluded with reason (n = 233)

- Not high income country (n=19)
- Incorrect outcome (incidence –prevalence) (n=79)
- Not vulnerable population (n=21)
- Incorrect population (other than non-vulnerable) (n=47)
- Incorrect publication type (n=37)
- Duplicate (n=10)
- Full text not available (n=20)

Full text articles assessed for eligibility

(n = 430)

**Screening**

Studies included in qualitative synthesis

(n = 197)

Reports excluded : Data not extractable (n = 71)

Studies included in quantitative synthesis (meta-analysis)

(n = 126):

- WSUD (n=9)
- WLWH (n=59)
- Immigrants (n=22)
- WLSES (n= 6)
- FSW (n=7)
- WMI (n=16)
- Prisoners (n=7)

**Included**

**Appendix 6 : table of included studies**

| **Study**  **Year**  **Country** | **Patient characteristics**  **Inclusion/ exclusion**  **Sample** | **Study cohort and data source** | **Study period**  **Follow-up length (Y/PY)**  **Mean age** | **Exposed/Non exposed cases** | **Risk estimate** |
| --- | --- | --- | --- | --- | --- |
| **Women living with Substance Use Disorder (WSUD)** | | | | | |
| **Eastment et al., 2022**  **USA**  **Retrospective cohort** | **Inclusion:** Age 21-65 years with at least one screening test during the study period  **Exclusion:** Hysterectomy  **Sample:** female with substance use-related diagnoses compared to without substance abuse. | Clinical data repository of electronic health record from from 45 clinics or women’s clinical un the academic healthcare system  **Alcoholic:** ICD10 codes for opioid-related disorders, cocaine-related disorders, other stimulant-related disorders, other psychoactive substance abuse, inhalant use/ abuse, sedative/ hypnotic/ anxiolytic abuse, hallucinogen abuse, cannabis use, and alcohol abuse/ misuse | **Study period:**  Jan 2016 to Dec 2019  **Follow-up:** not reported  **Mean age**: 55% between 21-39  **Classification:** Bethesda | **Drug use**: N=1675  Abnormal: N=304  (high-risk HPV positive, ASC-US, atypical squamous cells, cannot exclude HSIL (ASC-H), (LSIL), (HSIL) and squamous cell carcinoma)  **Comparator**: N=43338  Abnormal: N=4528 | Abnormal RR = 1.74 (1.56; 1.93)  Not included in analysis, incorrect lesion type |
| **Dahlman et al., 2021**  **Sweeden**  **Retrospective cohort** | **Inclusion**: Age 15-75 years  **Exclusion:** diagnosed with CC between January 1, 1991, and December 31, 1996  **Sample:** Incidence in drug use disorder compared to women without DUD | Swedish national registers: the Swedish National Patient Register (NPR) for inpatient care (1964–2015) and outpatient care (2001–2015), the Total Population Register, the Swedish Cause of Death Register (1961–2015), the Swedish Prescribed Drug Register (2005–2015), the Swedish Cancer Register (1958–2015), the Crime Register (1973–2015), and the Suspicion Register (1998–2015).  **Drug use:** CD-10: mental and behavioral disorders due to psychoactive substance use, except those due to alcohol or tobacco | **Study period:** 1997-2015  **Follow-up:** mean: 16.7 (SD: 3.6 years)  **Mean age:** 42.5 (SD: 16.9)  **Classification:**  Cytology testing  ICC: CD-7171 | **Drug user**: N=50 858  ICC: N=182  **Comparator:**  N=3 787 390  ICC: N=7 226 | ICC: HR = 1.91 (1.65; 2.21)  Adjusted for age  ICC estimate risk was added in comparative pooled estimate  Drug user: ICC cumulative incidence (/1000 women) = 3.6  Comparator: ICC cumulative incidence (/1000 women) = 1.9 |
| **Mancuso et al. 2019**  **Italy**  **Retrospective cohort** | **Inclusion:** All residents of Reggio Emilia province, aged ≥15 diagnosed with alcohol use disorders (AUD) or (injection/non-injection) drug use disorders (DUD) and cared for by the Addiction Care Service of the Reggio Emilia province  **Exclusion:** cancer cases before drug use disorder diagnosis  **Sample:** Linked to cancer registry | Alcohol and drug use disorder: Public addiction care service Cancer cases: Reggio Emilia cancer registry  **Alcoholics + Drug use disorder:** mental and behavioural disorders due to use of alcohol (ICD10 F10), opioids (ICD10 F11), cannabinoids (ICD10 F12) or cocaine (ICD10 F14) | **Study period:** 1985-2014  **Follow-up:** 28 646 person-years  **Median age:** 34 (IQR: 14)  **Classification:** not specified | **Alcoholics + Drug use disorder N=not reported**  ICC: N=3 | ICC: SIR: 8.6 (2.8; 26.7)  ICC estimate risk was added in comparative pooled estimate |
| **Soccio et al. 2015**  **Australia**  **Cross-sectional** | **Inclusion:** Women attending a residential drug and alcohol rehabilitation facility presenting for a pap smear  **Exclusion:** not specified  **Sample:** | Medical records collected in two center: community-based Well Women’s Clinic (CWWC)-residential drug and alcohol rehabilitation facility (RDARF)  **Drug and alcoholism:** not defined | **Study period:** Oct 2012-Dec 2013  **Follow-up:** not specified  **Mean age:** given by age group  **Classification:** Bethesda | **Drug and alcoholism: N=36**  HSIL: N=2  **Comparator (general population) N=66**  HSIL: N=0 | HSIL estimate risk was added in comparative pooled estimate |
| **Tonnesen et al. 1994**  **Denmark**  **Prospective cohort** | **Inclusion:** Women attending the outpatient clinic  **Exclusion:** wrong or missing ID  **Sample:** Linked to cancer registry | Alcoholics: Copenhagen outpatient clinic  Cancer cases: Danish cancer registry  **Alcoholism**: not defined | **Study period:** 1954-1987  **Follow-up:** mean: 9.4 years  **Mean age:** not specified  **Classification:** not specified | **Alcoholics: N=3 094**  ICC: N=22 | ICC: RR=2.0 (1.2; 3.0)  ICC estimate risk was added in comparative pooled estimate |
| **Thygesen et al. 2009**  **Denmark**  **Prospective cohort** | **Inclusion:** Women attending the outpatient clinic  **Exclusion:** died before 1968, invalid identifier, cancer diagnosis at inclusion, invalid date of entrance to the study  **Sample:** Linked to cancer registry | Alcoholics: Copenhagen outpatient clinic  Cancer cases: Danish cancer registry  **Alcoholism**: ICD criteria for alcohol dependence (ICD code 303.2), excessive alcohol abuse (ICD codes 303.0 + 303.1) and other kind of alcohol abuse (ICD code 303.9). | **Study period:** 1954-1999  **Follow-up:** mean 14.4 years  **Mean age:** not specified for women  **Classification:** ICD 7-171 | **Alcoholics + Drug use disorder N=3 552**  ICC: N=29 | ICC: SIR=1.8 (1.2; 2.6)  ICC estimate risk was added in comparative pooled estimate |
| **Reece et al., 2007**  **Australia**  **Cross-sectional** | **Inclusion:** women with substance use disorder  **Exclusion**: not reported  **Sample:** compared to general medical women | Southcity Family Medical Centre in Australia Survey  **Substance use disorder:** not defined | **Study period**: not reported  **Follow-up:** not applicable  **Mean age:**  Drug user: 31.2 (SEM: 0.6)  Comparator: 44.4 (SEM: 1.6)  **Classification:**  Cytology testing | **Drug user**:  CIN2 : N = 11/142  CIN3: N = 9/144  CIN2+ : N = 20/133  **ICC:** n =5/44  **Comparator**:  CIN2 : N = 1/76  CIN3: N = 2/75  CIN2+ : N = 3/74  ICC: n =0/77 | ICC and CIN2+ entered with 2x2 table in pooled comparative estimate  Note: only data from population <45 were extracted because there was a significant difference between the 2 groups in age if we considered all ages |
| **Weiderpass et al., 2001**  **Sweden**  **Retrospective cohort** | **Inclusion:** inpatient women diagnosed as alcoholic  **Exclusion:** erroneous national registration number and prevalent cancer, first year of follow-up  **Sample**: hospital discharge diagnosis of alcoholism matched with cancer registries compared to general population | Alcoholics: Swedish inpatient register linked to Cancer cases : national cancer registry  **Alcoholic:** (ICD-7: 307, 322; ICD-8: 291, 303; ICD-9: 291, 303, 305A) | **Study period:** 1965-1995  **Follow-up**: 9.4 year  **Mean age**: 42.7 (std not reported)  **Classification:**  ICC: ICD-7 code 171 | **Alcoholism: N=36 856**  ICC: N=129  In situ: N=502 | ICC: SIR = 2.9 (2.4; 3.5)  In situ: SIR = 1.7 (1.6; 1.9)  ICC and in situ estimate risks were added in comparative pooled estimate |
| **Sigvardsson et al. 1996**  **Sweden**  **Case-control** | **Inclusion:** women identified as alcoholic matched with women from general population (matching for region and day of birth)  **Exclusion:** women without personal identification number  **Sample:** matching for region and day of birth | Alcohol use: Temperence Boards in Sweden Cancer cases: Swedish cancer registry  **Alcoholism**: not defined | **Study period:** 1870-1961  **Follow-up:** not specified  **Mean age:** not specified  **Classification:** ICD-7-171 | **Alcoholics: N=15 508**  ICC: N=187  **Comparator (general population):**  **N=15 508**  ICC: N=48 | ICC: RR=3.9 (2.8; 5.4)  ICC estimate risk was added in comparative pooled estimate |
| **Adami et al. 1992**  **Sweeden**  **Retrospective cohort** | **Inclusion:** Inpatient women diagnosed as alcoholic  **Exclusion:** 1) wrong national registration number, 2) data not available for follow-up, 3) prevalent cancer  **Sample:** Linked to cancer registry | Alcoholics: Swedish inpatient register  Cancer cases: national cancer registry  **Alcoholics:** (ICD-7 codes 307, 322; ICD-8 codes 291,303) | **Study period:** 1965-1983  **Follow-up:** 19 years (mean 7 years)  **Mean age:** 49.4 years  **Classification:** ICD-7 and ICD-8 | **Alcoholism: N=not reported**  ICC: N=6 | ICC: SIR: 4.2 (1.5; 9.1)  ICC estimate risk was added in comparative pooled estimate |

| **Study**  **Year**  **Country** | **Patient characteristics**  **Inclusion/ exclusion**  **Sample** | **Data source** | **Study duration**  **Follow-up**  **Age**  **Classification** | **Exposed/Non exposed cases** | **Risk estimate** |
| --- | --- | --- | --- | --- | --- |
| **Women living with HIV (WLWH)** | | | | | |
| **Botha et al. 2023**  **South Africa**  **Prospective cohort** | **Inclusion:** woman, aged 25 to 65 years with no cervical cancer screening in the preceding 5 years  **Exclusion**: HIV status unknown  **Sample:** cohort | Three study sites in metropolitan areas of South Africa. | **Study duration:**  Not specified  **Follow-up:** not applicable  **Age:** between 30 and 45 years  **Classification:** Bethesda | **HIV+: N=564**  ICC : N=9  HSIL: N=101  **HIV-: N=430**  ICC : N=0  HSIL: N=29 | ICC and HSIL entered with 2x2 table in pooled comparative analysis |
| **Gardella et al. 2023**  **Italy**  **Retrospective cohort** | **Inclusion:** women with normal Pap smear and a negative HR-HPV test and who had at least one year of follow-up were selected for the analysis  **Exclusion**: age 21 years or older, ongoing pregnancy, treatment for CIN or total hysterectomy before enrollment.  **Sample:** cohort | Two Italian centers: IRCCS Fondazione Policlinico San Matteo, Pavia, and Luigi Sacco Hospital, ASSTFatebenefratelli-Sacco, University of Milan, Milan | **Study duration:** 1999-2019  **Follow-up:** median 84.3 months (IQR 31–167)  **Mean age:** 34 (range 30; 40) years  **Classification:** Bethesda | **HIV+: N=599** CIN2+: N=30 | Not Included in risk estimate pooled analysis - Cannot reproduce 2x2 table |
| **Lee et al. 2023**  **Korea**  **Retrospective cohort** | **Inclusion:** women with HIV  **Exclusion**: age *<*15, ethnic non-Koreans, and those who did not visit the hospital for HIV care, diagnosed with cancer for more than 90 days before HIV diagnosis, clinical diagnoses that could not be confirmed as malignancies  **Sample:** cohort | Pusan National University Hospital | **Study duration:** 1990-2021  **Mean age:** not specified for women  **Mean age:** not specified for women  **Classification:** not specified | **HIV+: N=97** ICC: N=0 prevalence ICC: N=2 Incidence | Not Included in risk estimate pooled analysis - Cannot reproduce 2x2 table |
| **Metz et al. 2023**  **Germany**  **Prospective cohort** | **Inclusion:** Pregnant women living with HIV, written consent  **Exclusion**: none  **Sample:** cohort | Ludwig- Maximilians-University (LMU) Hospital, Department of Obstetrics and Gynecology, Munich, | **Study duration:** Feb 2021- Aug 2021  **Follow-up:** not specified  **Mean age:** 32 ± 6 years  **Classification:** Bethesda | **HIV+: N=81** HSIL: N=5 | Not Included in risk estimate pooled analysis - Cannot reproduce 2x2 table |
| **Villalobos et al. 2023**  **South Africa**  **Retrospective cohort** | **Inclusion:** women ≥ 18 years old  **Exclusion**: women with only one HIV indicator  **Sample:** HIV cohort matched with cancer registries | Medical insurance scheme in South Africa  South African National Population Register (NPR) | **Study duration:** Jan 2011-July 2020  **Follow-up**: 1 894 673 person-years  **Mean age:** only reported by age category  **Classification:** ICD 10 N87.1, N87.2, D06, C53 | **HIV+: N=** **38 739** ICC: N=not reported  **HIV-: N=478 572** ICC: N=not reported | ICC: HR: 3.56 (2.93; 4.32) Carcinoma in situ: HR= 4.82 (4.10-5.67) Severe dysplasia: HR= 5.15 (4.79-5.54)  ICC estimate risk was added in comparative pooled estimate |
| **Zhou et al. 2023**  **USA**  **Cross sectional** | **Inclusion:** Woman, 18-64 years,  **Exclusion**: Medicare/Medicaid dually eligible individuals  **Sample: cohort** | Medicaid Analytic eXtract (MAX) database | **Study duration:** 2012  **Follow-up:** not applicable  **Mean age:** only reported by age category  **Classification**: ICD-9 | **HIV+: N=** **72 508** ICC: N= 837  **HIV-: N=** **17 353 963** ICC: N=37 898 | ICC: aPR= 4.20 (3.90; 4.52)  ICC estimate risk was added in comparative pooled estimate |
| **Cambrea et al., 2022**  **Romania**  **Prospective cohort** | **Inclusion:**  women aged between 18 and 60 years old, HIV-positive, sexually active, and had  signed informed consent  **Exclusion:** history of cervical precancerous lesions or other malignancies, total hysterectomy, pregnancy  **Sample:** cohort | HIV-positive women from Constanta, Southeast Region of Romania Sanchez | **Study period:** Sept 2018 to Feb 2020  **Follow-up:** Not applicable  **Mean age:** 31.8 years  **Classification:** Bethesda | **HIV+: N=40**  HSIL: N=0 | Not Included in risk estimate pooled analysis - Cannot reproduce 2x2 table |
| **Castle et al., 2022**  **USA**  **Retrospective cohort** | **Inclusion:** HPV and cytology co-testing in women aged 30–64 years in 2003  **Exclusion:** not reported  **Sample**: HIV- women were matched 111:1 on age and year of the first co-test | Kaiser Permanente Northern California (KPNC) cohort | **Study duration:** Jan 2003 to Feb 2021  **Follow-up:** ≥ 5 years  **Mean age**: 44.6 years  **Classification:** Cytology | **HIV + : N= 608**  CIN2+: N=22  CIN3+: N=7  **HIV-:** N= 67 488  CIN2+: N=907  CIN3+: N=377 | CIN2+ and CIN3+ entered with 2x2 table in pooled comparative analysis |
| **Chaussade et al., 2022**  **France**  **Prospective cohort** | **Inclusion**: aged ≥18 years have a confirmed HIV-1 infection and signed an informed consent  **Exclusions:** patient with a history of cancer  **Sample**: population based | ANRS CO3 Aquitaine cohort for the HIV+ and general population-based cancer registry in Gironde area for HIV- | **Study duration:** Jan 2010 to Dec 2017  **Follow-up:** 5 080 734 patient years  **Mean age:** reported by category  **Classification:** ICD-0-3; C50.0 C51.9 C53.1 C53.8 C53.9 C76.0 | **HIV+: N= Not reported**  ICC: N=6  **HIV-: N= Not reported**  ICC: N=641 | ICC: HIV+:  IR (per 100 000 person-years): 96.0  ICC: HIV-:  IR (per 100 000 person-years): 12.6  (No p-value)  NOT included pooled analysis; incorrect outcome reporting |
| **Dreyer et al., 2022**  **South Africa**  **Prospective cohort** | **Inclusion:** age ≥25 and ≤65 years. Requesting a cervical cancer screening test. Able to receive test result by text message or clinical visit. Able to provide informed consent.  **Exclusion:** previous hysterectomy, current pregnancy, aware of a cervical screening test in preceding 5 years, hesitant/unable to undergo screening, and treatment if indicated. Current or previous treatment for gynaecological cancer  **Sample**: cohort | Site A, at Tshwane District public Hospital, site B, at Kalafong Provincial Tertiary Hospital, and site C, at Tygerberg Academic Hospital, | **Study duration:** 2016-2020  **Follow-up:** ≥ 5 years  **Mean age:** 41.26 (range: 25-65)  **Classification:** Bethesda | **HIV+: N=456**  HSIL: N=94  **HIV-: N=648**  HSIL: N=32 | CIN2+ and CIN3+ entered with 2x2 table in pooled comparative analysis |
| **Duan et al., 2022**  **China**  **Cross-sectional** | **Inclusion:** HIV1 + and with ongoing cART, > 18 years, sexually active, able to both physically and mentally undergo cervical and anal sampling, have an intact cervix, not known to be currently pregnant and had signed informed consent  **Exclusion:** not specified  **Sample:** cohort | Third People’s Hospital of Kunming, Yunnan province in China | **Study period:** 2019 to 2022  **Follow-up:** not applicable  **Median age**: 41 (35–48)  **Classification:** Bethesda | **HIV+:** N=409  **CIN2+:** N=19 | Not Included in risk estimate pooled analysis - Cannot reproduce 2x2 table |
| **Klein et al., 2022**  **USA**  **Retrospective cohort** | **Inclusion:** HIV women ≥65 years, confirmed cytology  **Exclusion:** gynecologic malignancy prior to age 65. Unknown smoking status and immunosuppression due to transplant  **Sample:** controls were matched based on age, year resulted, and smoking status (ever, former, current) at the time of collection. | University of Maryland Medical System | **Study duration**: Jan 2003 to Apr 2019  **Follow-up:** not specified  **Mean age:**  HIV+: 66 (65; 68); HIV-: 66 (65; 68)  **Classification:** Cytology | **HIV +: N= 70**  ICC: N=1  **HIV-: N= 70**  ICC: N=1 | ICC: RR = 1.0 (0.1; 9.5)  ICC estimate risk was added in comparative pooled estimate |
| **Lee et al. 2022**  **South Korea**  **Retrospective cohort** | **Inclusion: w**omen living with HIV  **Exclusion**: foreigners, unknown age and sex did not undergo any follow-up tests  **Sample:** HIV cohort matched with cancer registries | Korea National Health Insurance Service (NHIS) database  National Cancer Registry | **Study duration:** 2002 – 2017  **Follow-up:** 4935.64 person-years  **Mean age:** not specified for women  **Classification:** ICD-10 codes | **HIV+: N=826** ICC: N=7 | ICC: SIR: 7.50 (3.00; 15.45)  ICC estimate risk was added in comparative pooled estimate |
| **Malmstrom et al., 2022**  **Sweden**  **Retrospective cohort** | **Inclusion**: people born between 1940 and 2000, and resident in Sweden sometime 1983–2017.  **Exclusions:** cancer diagnosed before date of  inclusion, and within the first year of follow-up  **Sample**: population based | Swedish Total Population Register, Swedish Cancer Register and Longitudinal integrated database for health insurance and labour market studies (LISA) | **Study duration:** 1988 to 2017  **Follow-up:** 3 periods of 10 years  **Mean age:**  1988-1997: HIV+: 32 ± 7.5; HIV-: 30 ± 9.9  1998-2007: HIV+: 36 ± 9.2; HIV-: 35 ± 12.7  2008-2017: HIV+: 40 ± 11.0; HIV-: 39 ± 15.4  **Classification:** C530-C539 | **HIV +:**  1988-1997: N= 2 936  1998-2007: N= 4 215  2008-2017: N= 7 235  **HIV-: N= 476 576**  1988-1997: N= 4 877 618  1998-2007: N= 5 808 787  2008-2017: N= 7 285 463 | 1988–1997: HR = 2.16 (0.30; 15.34)  1998–2007: HR = 0.88 (0.12; 6.29)*  2008–2017: HR= 3.86 (2.13; 6.97)*  ICC estimate risk was added in comparative pooled estimate |
| **Morales et al., 2022**  **Romania**  **Cross-sectional** | **Inclusion**: aged ≥18 years registered for at least two years at general practices contributing up-to-standard linked data to CPRD GOLD  **Exclusions:** not reported  **Sample**: cohort | UK Clinical Practice Research Datalink GOLD | **Study duration:** 2015  **Follow-up:** not applicable  **Mean age:** reported by category  **Classification:** ICD-10 (not specified specific for cervical) | **HIV +: N= 369**  ICC: N<5  **HIV-: N= 476 576**  ICC: N=822 | ICC: OR = 3.57 (0.89; 9.31)  ICC estimate risk was added in comparative pooled estimate |
| **Muchengeti et al., 2022**  **South Africa**  **Prospective cohort** | **Inclusion:** HIV+ (both adults and children) who  accessed HIV care in public sector facilities and had HIV diagnostic or monitoring laboratory tests from NHLS  **Exclusion:** not specified  **Sample:** HIV cohort matched with cancer registries | National Health Laboratory Services (NHLS) and  National Cancer Registry  April 1993 through March 2000 | **Study duration:** 2004–2014  **Median Follow-up:** 2.0 years (IQR: 0.6–3.8), 13 198 218 person-years  **Mean age:** not specified for women  **Classification:** ICD-O-3- | **HIV+:** N=3 606 565  **ICC:** N=7 433 | ICC:  IR: 66.1 (64.6 to 67.6) per 100 000 person-years  Not Included in risk estimate pooled analysis – |
| **Park et al., 2022**  **Korea**  **Retrospective cohort** | **Inclusion:** HIV+  **Exclusion:**  any hospital visits for HIV with catastrophic illness codes before 2006, cancer catastrophic illness code before the first date of visit attributable to HIV, and more than 60 days between the first hospital visit for HIV and the date of registration for catastrophic illness codes, cancer diagnosis, or death within 90 days of first hospital visit for HIV  **Sample:**  Compared to general population | National Health Insurance Service–National Health Information Database (NHIS-NHID) in Korea | **Study period:** Jan 2006 to Dec 2018  **Follow-up:** 7.3 (1.3) or 8090.87 person-year  **Median age**: reported by category  **Classification:** ICD-10- C53 | **HIV+: N=1 108**  ICC: N=7 | ICC: SIR: 4.98 (1.29; 8.66)  ICC estimate risk was added in comparative pooled estimate |
| **Rojas-Rojas et al., 2022**  **France**  **Retrospective cohort** | **Inclusion:**  HIV aged 15 years and over, with or without a history of cancer, and having at least one follow-up visit with signed informed consent  **Exclusion:** diagnosis during the first 30 days after enrolment  **Sample:** cohort | Dat’AIDS cohort | **Study period:** 2010-2015  **Follow-up:** not specified  **Median age:** not reported only for women  **Classification:** ICD-10 C53 | **HIV +: N=13 543**  **ICC:**  Before 2000: N=9  After 2000: N=7 | **ICC:**  Before 2000: SIR:2.06 (1.07; 3.97)  After 2000: SIR: 1.77 (0.84–3.72)  ICC estimate risk was added in comparative pooled estimate |
| **Sanchez-Covarrubias et al., 2022**  **USA**  **Retrospective cohort** | **Inclusion:** women with a previous diagnosis of HIV, a negative baseline cytology screening between 2009 and 2012, and at least 2 visits within a year period  **Exclusion:** not specified  **Sample: c**ohort | Gynecologic HIV clinic database in a tertiary care center in Miam | **Study period:** 2010 to 2013  **Follow-up:** 5 years  **Mean age:** 44.8 ± 11 years  **Classification: Bethesda** | **HIV+: N=162**  HSIL: N=0 | Not Included in risk estimate pooled analysis - Cannot reproduce 2x2 table |
| **Wagner et al. 2022**  **Germany**  **Prospective cohort** | **Inclusion:** women with HIV+, written consent  **Exclusion**: current pregnancy  **Sample:** cohort | outpatient Clinic for Infectious Diseases at the Department for Obstetrics, Charite-Universitatsmedizin Berlin | **Study duration:** Oct 2017-Sep 2020  **Follow-up:** not specified  **Mean age:** 41 (range 17-62)  **Classification:** Bethesda | **HIV+: N=84** HSIL: N=6 | Not Included in risk estimate pooled analysis - Cannot reproduce 2x2 table |
| **Poizot-Martin et al., 2021**  **France**  **Retrospective cohort** | **Inclusion**: HIV+  **Exclusion:** not specified  **Sample:** Compared to general population | Dat’AIDS cohort | **Study period:** Jan 2010 to Dec 2015  **Follow-up:** not specified for women  **Mean age:** not specified for women  **Classification: ICD-10-** **C53** | **HIV+:**  **13 543**  ICC: N=16 | ICC: SIR: 1.93 (1.18; 3.14)  ICC estimate risk was added in comparative pooled estimate |
| **Ruffieux et al., 2021**  **South Africa**  **Retrospective cohort** | **Inclusion:** HIV+, ≥18 years with CD4 count measurements on separate days, and who had at least 1 year of follow-up after the date of their first CD4 count.  **Exclusion:**  missing information on sex or age, previous cancer  **Sample:**  HIV cohort matched with cancer registries | South African HIV Cancer National Health Laboratory Services and cancer records from the National Cancer Registry | **Study duration:**  **2004–2014**  **Follow-up:** not specified  **Mean age:**  not specified for women  **Classification:**  ICD-10- C53 | **HIV+:**N=not specified  ICC: N=4 150 | Not Included in risk estimate pooled analysis - Cannot reproduce 2x2 table |
| **Spence et al., 2021**  **USA**  **Retrospective cohort** | **Inclusion:** HIV+, age ≥ 18 enrolled at 14 of the 15 DC Cohort clinical sites who contributed ≥ 3 months of active follow-up.  **Exclusion:** known history of cancer and those with incident cancers during the follow-up period  **Sample: cohort** | DC cohort | **Study period:** Jan 2011 to Dec 2017  **Follow-up:** not specified for women  **Mean age:** not specified for women  **Classification: ICD-9 and ICD-10** | **HIV+: 2 183**  ICC: N=5 | ICC: IR: 0.7 (0.1; 4.4) per 1000  ICC estimate risk was added in comparative pooled estimate |
| **Stier et al., 2021**  **USA**  **Retrospective cohort** | **Inclusion:** HIV+ and <80 years  **Exclusion:** not specified  **Sample:** HIV cohort matched with cancer registries  Compared to general population | HIV/AIDS Cancer | **Study period:** 2002-2016  **Follow-up:** 1.16 million  person-years  **Median age:** 37.8 years  **Classification:** ICD-O-3 - C530-C539 | **HIV+ : N=161 084**  ICC : N=552 | ICC: SIR: 3.40 (3.13; 3.70)  ICC estimate risk was added in comparative pooled estimate |
| **Srisomboon et al., 2021**  **Thailand**  **Cross-sectional** | **Inclusion**: women aged 25-65 years with ASC-US cytology on conventional Pap smears and available histopathology results  **Exclusions:** were women who were pregnant, had prior abnormal Pap smear, and history of cervical neoplasia, concurrent malignancy of other organs.  **Sample**: Control were HIV-negative women with ASC-US cytology recruited as controlled subjects matching 5:1 for the following variables (± tolerance): age (± 5 years), and examination time period (± 6 months). | Chiang Mai University Hospital | **Study duration:** Jan 2008 - Dec 2020  **Follow-up:** not applicable  **Mean age:** HIV+: 44.3 ± 8.5); HIV-: 44.3 ± 9.7) years  **Classification:** Bethesda | **HIV+ : N= 57**  CIN2+: N=3  **HIV- : N= 285**  CIN2+: N=14 | CIN2+: OR: 1.08 (0.30; 3.87)  ICC estimate risk was added in comparative pooled estimate  Note: population of atypical ASC-US cytology at inclusion |
| **Massad et al., 2020**  **USA**  **Prospective cohort** | **Inclusion:** HIV+  **Exclusion:** missing Pap test results, prior hysterectomy, or a self-reported cervical cancer history  **Sample:** cohort | Women’s Interagency HIV Study, the US women’s HIV cohort | **Study period:** 1994–1995, 2001–2002, 2011–2012, 2013–2015  **Follow-up:** not specified  **Mean age:**  36.9 (8.3)  **Classification: Bethesda** | **HIV+: N=3 151**  CIN2: N=65  CIN3+ : N=33 | Not Included in risk estimate pooled analysis - Cannot reproduce 2x2 table |
| **Michaud et al., 2020**  **USA**  **Retrospective cohort** | **Inclusion**: all beneficiaries with at least 24 months of continuous enrolment (2-month gap allowed) in a Medicaid fee for service (FFS) or comprehensive managed care (MCO) plan, aged between 18 and 64 years at the start of enrolment, and not dually Medicare/Medicaid enrolled.  **Exclusions:** Individuals with one or more claims for a total hysterectomy with a claim date prior to the index date  **Sample**: matched 1:3 HIV+ and HIV- on race, geographic state, age and calendar year | U.S. Medicaid program form 14 states | **Study duration:** 2001- 2012  **Follow-up:** 3.32 (2.09; 3.18)  **Mean age:** 38.5 ± 11.1 years  **Classification:** ICD-9 | **HIV+: N=110 898**  ICC: N=490  **HIV-: N=332 694**  ICC: N=338 | ICC: HR: 3.67 (3.19; 4.21)  ICC estimate risk was added in comparative pooled estimate |
| **Ntuli et al., 2020**  **South Africa**  **Cross-sectional** | **Inclusion**: women were screened for cervical cytology smears  **Exclusions:** not reported  **Sample**: population based | National Health Laboratory Services (NHLS) and Central Data Warehouse (CDW) database | **Study duration**: Jan 2013 - Dec 2015  **Follow-up:** not applicable  **Mean age:** 39.8 ± 13.6 years  **Classification:** Cytology | **HIV+ : N=39 220**  CIN2+: N=2 591  **HIV- : N=45 446**  CIN2+: N=962 | CIN2+ entered with 2x2 table in pooled comparative analysis |
| **Stewart et al., 2020**  **USA**  **Retrospective cohort** | **Inclusion: HIV+, >** 65 years, no history of abnormal cervical cytology, hysterectomy for nonbenign (eg, neoplastic) reasons prior to age 65, who received gynecologic follow-up  within the system for study duration  **Exclusion:** missing Pap test results, prior hysterectomy, or a self-reported cervical cancer history  **Sample:** cohort | Hospital system in Houston, Texas. | **Study duration:** Jan 2000 -Jan 2018  **Follow-up:** overall not specified  **Mean age: not specified**  **Classification: Bethesda** | **HIV+: N=64**  HSIL: N=3 | Not Included in risk estimate pooled analysis - Cannot reproduce 2x2 table |
| **Grabar et al., 2019**  **France**  **Retrospective** | **Inclusion:** HIV-1 or HIV-2 infection and written informed consent. women with at least one CD4 cell count available and a follow-up visit  **Exclusion:** French overseas (data not available)  **Sample:** linked with population-based cancer registry | French Hospital Database on HIV (FHDH-ANRS CO4)  And French Network of Population-Based Cancer registries (FRANCIM) | **Study period:** 1992 to 2009  **Follow-up:** 30 233 person-year  **Mean age:**  39 (36–46)  **Classification:**  ICD codes | **HIV+: N=28 977**  ICC: N=87 | ICC:  1992–1996: SIR = 5.4 (3.0; 8.9)  1997–2000: SIR = 4.4 (2.7; 6.8)  2001–2004: SIR = 3.4 (2.1–5.1)  2005–2009: SIR = 3.3 (2.2–4.7)  ICC estimate risk was added in comparative pooled estimate |
| **Zhu et al., 2019**  **China**  **Retrospective cohort** | **Inclusion:** HIV + on or before 31 December 2011, ≥15 years  **Exclusion:** died or been lost to follow-up prior to the start of the study on 1 January 2008, or not having attended at least one follow-up visit prior to 30 June 2012  **Sample:** Compared to general population | HIV/AIDS Comprehensive Response Information Management System (CRIMS) | **Study duration:**  Jan 2008 to Jun 2012  **Follow-up:** not specified for female  **Mean age:** not specified for female  **Classifications: ICD-0-3 C53** | **HIV+: N=** **120 543**  ICC : N=128 | ICC: SIR: 3.8 (3.2; 4.6)  ICC estimate risk was added in comparative pooled estimate |
| **Rihana et al., 2018**  **USA**  **Retrospective cohort** | **Inclusion:** HIV+  **Exclusion:** previous malignancy  **Sample:** cohort | Moffitt Cancer Center | **Study duration:**  Jan 2000 - Dec 2010  Follow-up: not specified  **Mean age:**  not specified  **Classification:**  not specified | **HIV+: N=46**  ICC: N=7 | Not Included in risk estimate pooled analysis - Cannot reproduce 2x2 table |
| **Silverberg et al., 2018**  **USA**  **Case-control** | **Inclusion:** women who had cytology between January 1995 and June 2014  **Exclusion:** hysterectomy with unknown date no health plan membership after cytology  **Sample**: random selection of 5:1 matched by age (within one year), time since first cytology in the health system (within one year), and years of continuous prior health plan membership (within one year) | Kaisers Permanente Northern and Southern Californian (KPNC) | **Study duration**: January 1995 to June 2014  **Follow-up:** not specified  **Mean age:** HIV+: 35.6 ± 11.3; HIV-: 35.6 ± 11.3  **Classification:** Cytology | **HIV+ : N=20 146**  CIN2+: N=36  **HIV- : N=100 144**  CIN2+: N=79 | ICC: aRR 2.0 (1.3; 3.0)  ICC estimate risk was added in comparative pooled estimate |
| **Videla et al., 2018**  **Spain**  **Retrospective cohort** | **Inclusion:** HIV+ with two consecutive normal cervical cytology tests (with a year between both) and no prior history of cervical dysplasia or cervical cancer, naive for cART, and with CD4 cell count below 500 cells/mL. Additionally, baseline and last follow-up (at least 10 years apart) frozen cervical secretion samples had to be available for HPV testing.  **Exclusion:** not specified  **Sample:** cohort | HIV Unit of the Germans Trias i Pujol University Hospital | **Study duration: Mar 1999 - Jan 2003**  **Follow-up:** median 13.2 (7.4–17.1) years  **Mean age:** 36 (6.5)  **Classification: Bethesda** | **HIV+: N=67**  HSIL: N=4 | Not Included in risk estimate pooled analysis - Cannot reproduce 2x2 table |
| **Wang et al. 2018**  **China**  **Retrospective cohort** | **Inclusion:** age ≥ 18 years, confirmed HIV positive; completed all diagnostic  tests for HIV and STIs and consented to attend the study  **Exclusion**: not specified  **Sample:** cohort | Maternal and child health centres of Hezhou county, Guangxi Province | **Study duration:** Mar 2014- Aug 2014  **Follow-up:** not applicable  **Mean age:** only reported by age category  **Classification:** Cytology | **HIV+: N=183** CIN2: N=5 CIN3: N=4 | Not Included in risk estimate pooled analysis - Cannot reproduce 2x2 table |
| **Hernández-Ramírez et al., 2017**  **USA**  **Retrospective cohort** | **Inclusion:** HIV women  **Exclusion:** first three months of follow-up were excluded to remove prevalent cancers  **Sample:** HIV cohort matched with cancer registries | U.S. HIV/AIDS Cancer Match (HACM) | **Study period:** 1996–2012  **Follow-up:** 893 325 person-year  **Mean age:** reported by category  **Classification:** not specified | **HIV+: N=129 995**  ICC: N=428 | ICC: SIR = 3.24 (2.94; 3.56)  ICC estimate risk was added in comparative pooled estimate |
| **Massad et al., 2017**  **USA**  **Prospective cohort** | **Inclusion**: cytology test available, age 18-70 years  **Exclusions:** hysterectomy prior to enrollment, cervical cancer prior to study and no follow-up.  **Sample**: matched 5:1 age and incidence-density selected women | Women’s Interagency HIV study cohort (WIHS) | **Study duration:** 1994-2015  **Follow-up:** 21 years  **Median age:** HIV+: 35.9 (30.8, 40.6); HIV-: 34.2 (27.6, 40.0)  **Classification:** Bethesda | **HIV+: N=1 807**  ICC: N=4  **HIV-: N=488**  ICC: N=0 | ICC: SIR = 3.3 (0.90, 8.47)  ICC estimate risk was added in comparative pooled estimate |
| **Rohner et al., 2017**  **South Africa**  **Retrospective cohort** | **Inclusion:**  HIV+, ≥ 18 years who initiated ART at the Themba Lethu Clinic  **Exclusion**: previous ICC  **Sample:**  HIV cohort matched with cancer registries | Themba Lethu Clinic (TLC) in Johannesburg, South Africa  South African National Cancer Registry (NCR) database | **Study duration:**  Apr 2004 to Aug 2011  **Follow-up**: 27,257 person-years  **Median age:** 35 years (IQR 30–42 years)  **Classification:** cytology | **HIV+:** N=10 640  **ICC:** N=138 | Incidence rate: 506 (428–598) per 100,000 person-years  Not Included in risk estimate pooled analysis |
| **Tanaka et al., 2017**  **Brazil**  **Retrospective cohort** | **Inclusion:** HIV+, ≥ 13 years  **Exclusion:** not specified  **Sample:**  HIV cohort matched with cancer registries | Population-based Cancer Registry of Sao Paulo and the AIDS notification database (SINAN) | **Study duration:**  1980-2013  **Follow-up:** not specified  **Mean age:** not specified for women  **Classification:**  not specified | **HIV+: N=** **23 672**  ICC: N=114 | Not Included in risk estimate pooled analysis - Cannot reproduce 2x2 table |
| **Mayor et al., 2016**  **Puerto Rico**  **Retrospective cohort** | **Inclusion**: 21 years or older  **Excluded:** not specified  **Sample:** HIV cohort matched with Puerto Rico Central Cancer Registry (PRCCR) data and the Puerto Rican Morality Registry (PRMR) | Retrovirus Research Center (RCC) HIV cohort | **Study period:** Jan 1992- Dec 2009  **Follow-up:** not reported  **Mean age**: not reported for women  **Classification**: ICD-9 and ICD-10 | **HIV+ : N=1 218**  ICC:  1992–1995: N =8  1996–2002: N=8  2003–2009: N=7 | ICC:  1992–1995: SIR =47 (20; 93)  1996–2002: SIR=15 (6; 29)  2003–2009: SIR=9 (4; 19)  ICC estimate risk was added in comparative pooled estimate |
| **Salters et al., 2016**  **Canada**  **Retrospective cohort** | **Inclusion:** ≥19 years old  **Exclusion:** cancer diagnosis that preceded their first HIV care contact  **Sample**: HIV cohort matched with cancer registries | British Columbia Cancer Agency, British Columbia Centre for Excellence in HIV/AIDS *linked to* BC Cancer Agency | **Study period:** 1994–2008  **Follow-up:** 12 529 person-year | **HIV+: N=2 211**  ICC: N=22 | ICC: SIR = 24.2 (12.2; 36.6)  ICC estimate risk was added in comparative pooled estimate |
| **Thorsteinsson et al., 2016**  **Denmark**  **Retrospective cohort** | **Inclusion**: aged 16 years or more at the time of HIV diagnosis  **Exclusions:** history of ICC, carcinoma in situ or hysterectomy prior to the index date  **Sample**: matched 15:1 age and incidence-density selected women | Registries: The Civil Registration System (CRS), Danish HIV Cohort Study (DHCS) and the Danish Pathology Data Bank (DPDB) and the Danish Cancer Registry (DCR) | **Study duration:** Jan 1999 to Dec 2010  **Follow-up:** 2412 person-years  **Median age:** 42.9 (36.3; 48.4) years  **Classification:** Cytology | **HIV+: N=1 140**  ICC: N=0  CIN2+: N=51  CIN3+: N=21  **HIV-: N=17 046**  ICC: N=6  CIN2+: N=356  CIN3+: N=231 | ICC, CIN2+, CIM3+ entered with 2x2 table in pooled comparative analysis |
| **Chen et al., 2015**  **Taiwan**  **Nested case-control** | **Inclusion:** inpatients and outpatients with HIV infection  **Exclusion:** Not specified  **Sample**: 1:4 randomly matched to the case group by sex, age, and year of enrollment (year of HIV diagnosis). | National Health Insurance Research Database (NHIRD) | **Study duration:** Jan 2000 to Dec 2011  **Follow-up: 4.6 years**  **Mean age:** reported by category  **Classification:** ICD-9-CM | **HIV+: N=279**  ICC: N=4  **HIV-: N=1 116**  ICC: N=not reported | ICC: SIR = 4.01 (1.00; 16.06)  ICC estimate risk was added in comparative pooled estimate |
| **Castilho et al., 2015**  **Brazil**  **Retrospective cohort** | **Inclusion:** patients must have completed  a minimum of 60 days of follow-up (INI) or two  clinic visits within the first year of clinic entry (VCCC). Informed consent was obtained for VCCC  **Exclusion:** Not specified  **Sample**: retrospective cohort | Instituto Nacional de Infectologia Evandro Chagas (INI) in Rio de Janeiro and Vanderbilt Comprehensive Care Clinic (VCCC) in Nashville | **Study period:** 1998 to 2010  **Follow-up:**  2,333.8 person-years for INI and 15,327.2 person-years for VCCC  Mean follow-up: 3 years  **Median age:**  36 (29–43) for INI and 38 (31–45) for VCCC  **Classification:** not reported | **HIV+ (N=978) INI**  ICC: N=0  **HIV+ (N=938) VCCC**  ICC : N=1 | ICC :  INI: SIR: 0 (0; 3.2)  VCCC: SIR: 2.7 (0.7; 14.9)  ICC estimate risk was added in comparative pooled estimate |
| **Da Silva et al., 2015**  **Brazil**  **Cross-sectional** | **Inclusion:** confirmed anti-HIV result, aged 18–49 years, and agreed to participate.  **Exclusion:** pregnancy at the time of study, previous hysterectomy, or history of cervical conization  **Sample**: cohort | Tertiary referral hospital in the city of Manaus, Amazonas, Brazil, | **Study duration:** March and December 2011  **Follow-up:** not applicable  **Median age:** 32 (IQR: 27–38)  **Classification:** Bethesda | **HIV+: N=310**  HSIL: N=8 | Not Included in risk estimate pooled analysis - Cannot reproduce 2x2 table |
| **Davies et al., 2015**  **UK**  **Cross-sectional** | **Inclusion:** HIV+, aged between 24 and 65, recent smear test (within one year) and attendance at one of the two clinics for their routine HIV care during the study period  **Exclusion**: hysterectomy and two had inadequate smear tests  **Sample:** cohort | Departmental  databases and the national database for cytology  results (Open Exeter) | **Study period:** December 2010 and December 2011  **Follow-up:** December 2011 and March 2012  **Mean age:** 40.8 years; range 24–61  **Classification:** cytology | **HIV+:** N=179  ICC: N=1  Moderate dysplasia (CIN2) : N=2  Severe dysplasia:  (CIN3): N=1  CIN2+: N=3  CIN3+: N=1 | Not Included in risk estimate pooled analysis - Cannot reproduce 2x2 table |
| **Keller et al., 2015**  **USA**  **Prospective cohort** | **Inclusion:** HIV women, written consent  **Exclusion:** baseline HPV or CD4 cell count  data were unavailable; prior to  enrollment, unavailable follow-up data; HIV seroconversion occurred during follow-up  **Sample**: Cohort | Women’s Interagency HIV study cohort (WIHS) | **Study duration:** 1994–2002  **Follow-up:** 5 years  **Mean age:** HIV+: 35 ± 8; HIV-: 32 ± 8  **Classification:** Bethesda | **HIV+ : N=1 021**  CIN2+ : N=22  CIN3+ : N=9  **HIV-: N=518**  CIN2+: N=unclear  CIN3+: N=0 | CIN-2+: HIV+: cumulative risk 5-year 22% (9%; 34%)  CIN3+ entered with 2x2 table in pooled comparative analysis |
| **Leila da Silva et al., 2015**  **Brazil**  **Cross-sectional** | **Inclusion:** HIV+, age 18 to 49 years, agreed to participate, conducted interview and collection of material for laboratory tests  **Exclusion:**  pregnancy at the time of study, previous hysterectomy, or history of cervical conization. Women did not perform sample collection  **Sample: cohort** | AIDS clinic in Amazonas state, Brazil | **Study period:**  Mar to Dec 2011  **Follow-up:** not applicable  **Mean age:** 32 (IQR: 27–38)  **Classification:** Bethesda | **HIV+:** N=310  HSIL: N=8  ICC: N=0 | Not Included in risk estimate pooled analysis - Cannot reproduce 2x2 table |
| **Loy et al., 2015**  **Ireland**  **Cross-sectional** | **Inclusion**: HIV+, eligible for a cervical smear who were over 18 years and written consent  **Exclusion:** not specified  **Sample:** cohort | HIV clinic in St James’s Hospital, Dublin, Ireland | **Study period:**  Jan 2007 and Aug 2010  **Follow-up**: not applicable  **Median age:** 34.6 years (range: 17-71)  **Classification:** not specified | **HIV+: N=321**  HSIL: N=14 | Not Included in risk estimate pooled analysis - Cannot reproduce 2x2 table |
| **Massad et al., 2015**  **USA**  **Prospective cohort** | **Inclusion**: HIV-seropositive and HIV-seronegative women, gave written informed consent  **Exclusions:** women diagnosed with CIN3+ and CIN2+ within 6 months of study enrollment, hysterectomies  at baseline, and without follow-up  **Sample**: population based | Women’s Interagency HIV study cohort (WIHS) | **Study duration:** Oct 1994 - Sept 2013  **Median follow-up:** HIV+: 9.9 (2.5 ± 16.0); HIV-: 11.0 (5.4 ± 17.2)  **Median age**: HIV+:35 (30-41); HIV-: 33 (26-40) years  **Classification:** Cytology | **HIV+ : N=2 565**  CIN2+: N=316  CIN3+: N=139  **HIV- : N=900**  CIN2+: N=34  CIN3+: N=19 | CIN2+, CIN3+ entered with 2x2 table in pooled comparative analysis |
| **Robbins et al., 2015**  **USA**  **Retrospective cohort** | **Inclusion:** HIV+  **Exclusion:** Not specified  **Sample:**  HIV cohort matched with cancer registries | US HIV population from the HIV/AIDS Cancer Match (HACM) Study | **Study period:** not specified  **Follow-up:** not applicable  **Mean age:** not specified for women  **Classification:** not specified | **HIV+:** N=215 896  ICC: N=80 | Not Included in risk estimate pooled analysis - Cannot reproduce 2x2 table |
| **Tavares et al., 2015**  **Portugal**  **Cross-sectional** | **Inclusion:** HIV+  **Exclusion**: incomplete data  **Sample:** cohort | Coimbra Hospital and University Center | **Study period:**  January 2008 and December 2011  **Follow-up:** not applicable  **Mean age:**  35.9 ± 6.5 years  **Classification:** cytology | **HIV+: N= 83**  HSIL: N=2 | Not Included in risk estimate pooled analysis - Cannot reproduce 2x2 table |
| **Ursu et al., 2015**  **Croatia**  **Cross-sectional** | **Inclusion:** HIV+ and HIV- from cohort  **Exclusion:** not specified  **Sample:** cohort | **HIV+:** Infectious Disease “St. Parascheva” Clinical University  Hospital Iaşi.  **HIV-:** “Cuza-Vodă” Gynecology Clinical University Hospital Iaşi | **Study duration:** Jun 2013–Sept 2014  **Follow-up:** not applicable  **Mean age: HIV+:** 22.9 (range: 17-30); HIV-: 36.5 (range 17-84)  **Classification:** Bethesda | **HIV+: N=40**  HSIL N=0  **HIV-: N=992**  HIV- age<30 (N=307)  HSIL: N=16/307 | HSIL entered with 2x2 table in pooled comparative analysis |
| **Zohar et al., 2015**  **Israel**  **Retrospective cohort** | **Inclusions:** adults older than 15 years of age who were diagnosed with HIV/AIDS and/or cancer between 1981 and 2010, Israeli citizens  **Exclusion:** cancer before or during their first visit to the HIV clinic  **Sample:** HIV cohort matched with cancer registries compared to general population | HIV/AIDS Registry (NHAR)  Linked to: Israeli Cancer Registry | **Study period:** Jan 1981 - Dec 2010  **Follow-up:** Not reported for female only | **HIV+: N=1 641**  ICC:  Born before 1996: N=16  Born after 1997: N=16 | ICC:  Born before 1996:  SIR: 823.8 (not 95%CI reported)  Born after 1997:  SIR: 416.0 (not 95%CI reported)  ICC not included pooled analysis missing 95%CI |
| **Chen et al., 2014**  **Taiwan**  **Retrospective cohort** | **Inclusion:** HIV-infected women  **Exclusion:** < 15 years old, diagnosed with cervical neoplasia, infected with HIV in the general population or deceased prior to 2000 were excluded  **Sample**: matched with general population NHI program | National Health Insurance Research Database (NHIRD) | **Study duration:** Jan 2000 to Dec 2011  **Follow-up:**  9 years, 4 377 (HIV+) and 3 066 196 person-years (HIV)  **Median age:** HIV+: 31.6 (15.7; 89.0); HIV-: 37.4 years (15; 105.7)  **Classification:** not reported | **HIV+: N=1 360**  ICC: N=7  In situ: N=6  **HIV-: N=358 141**  ICC and in situ: N=2 258 | ICC: SIR = 4.10 (1.66; 8.48)  In situ: SIR = 4.0 (1.47; 8.70)  ICC and In situ estimate risk was added in comparative pooled estimate |
| **Robbins et al., 2014**  **USA**  **Retrospective cohort** | **Inclusion:** HIV+  **Exclusion:** Not specified  **Sample:**  HIV cohort matched with cancer registries | HIV/AIDS Cancer and (HACM) Study, | **Study duration:**  CDC 2010 mid-year estimates: averaged 2009 and 2010  HACM Study, 2003–2010  **Follow-up:**  **4.5 years**  **Mean age:** only reported by category  **Classification:** not specified | **HIV+: N=275 975** | Excess estimated cancer rate:  ICC: 50 (20 to 90)  Not included as not analysable data |
| **Abraham et al., 2013**  **USA**  **Retrospective cohort** | **Inclusion:** no history of ICC at enrollment. Only cases that had clear documentation of a histologic diagnosis of ICC were included.  **Exclusion:** Not specified  **Sample**: Compared to three cohort | North American AIDS Cohort Collaboration on Research and Design (NA-ACCORD) | **Study duration**: Jan 1996 - Dec 2010  **Follow-up:** 4.5 years  **Mean age:** HIV+: 37 (31–44); HIV-: 37 (31–44) years  **Classification:** Cytology | **HIV+: N=13 690**  ICC: Incidence N=17  ICC: Prevalence N=50  **HIV-: N=12 021**  ICC: N=4 | ICC entered with 2x2 table in pooled comparative analysis |
| **Hleyhel et al., 2013**  **France**  **Prospective cohort** | **Inclusion:** HIV type 1 (HIV-1) or HIV type 2 (HIV-2) infection, 15 and 84 years  **Exclusion:** French overseas (data not available)  **Sample**: cohort | French Hospital Database on HIV (FHDH-ANRS CO4)  Compared to general population were obtained from the association of the French network of Cancer Registries (FRANCIM) | **Study period:** Jan 1992- Dec 2009  **Follow-up (in person-years)**  1992–1996: N=29 198  1997–2000: N=39 484  2001–2004: N=52 205  2005–2009: N=79 139  **Mean age**: not reported for women  **Classification:** ICD-9-180; ICD-10- C53 and ICD-O-3- C53.x | **HIV+**  1992–1996: N=11 314  1997–2000: N=13 370  2001–2004: N=17 143  2005–2009: N=21 439  **ICC:**  1992–1996: N=39  1997–2000: N=48  2001–2004: N=38  2005–2009: N=55 | ICC :  1992–1996: SIR =12.2 (8.7; 16.6)  1997–2000: SIR=9.3 (6.9; 12.3)  2001–2004: SIR=5.4 (3.8; 7.5)  2005–2009: SIR=5.4 (4.0; 7.0)  ICC estimate risk was added in comparative pooled estimate |
| **Kreitchmann et al., 2013**  **Brazil**  **Prospective cohort** | **Inclusion:**  HIV+, referred and agreed to have a gynecological evaluation at a reference  **Exclusion:**  cervix surgically removed  **Sample:** cohort | Center for sexually transmitted infections/AIDS in Porto Alegre, southern Brazi | **Study duration:**  July 1997 and April 2007  **Follow-up:** not specified  **Mean age:** 32.4 ± 9.4  **Classification:** Bethesda | **HIV+:** N=898  HSIL: N=22 | Not Included in risk estimate pooled analysis - Cannot reproduce 2x2 table |
| **Kadhel et al., 2012**  **France**  **Prospective cohort** | **Inclusion:** HIV+, >15 years, written consent  **Exclusion:** history of ICC or ICC at baseline  **Sample:**  HIV cohort matched with cancer registries | Guadeloupian HIV Survey Health Centre | **Study duration:**  Jan 1999 to Dec 2006  **Follow-up:**  7738 person-years  **Mean age:**  37.2 (range  15 to 89)  **Classification**: cytology | **HIV+:** N=1232  ICC: N=3  CIN2: N=20  CIN2+: N=46  CIN3: N=36 | ICC: SIR: 1.7 (0.3; 5.0)  CIN2: SIR: 9.9 (6.1; 15.3)  CIN3: SIR: 5.2 (3.4; 7.7)  ICC estimate risk was added in comparative pooled estimate |
| **Zhang et al., 2012**  **China**  **Cross-sectional** | **Inclusion:**  HIV +, no evidence of pregnancy, absence of debilitating illness that might have precluded a pelvic examination, no prior history of screening or treatment for cervical neoplasia, and no prior hysterectomy, written consent  **Exclusion:**  as above  **Sample:** cohort | The Women and Children’s Hospital of Luxi County in Mangshi, Dehong Prefecture, | **Study duration:**  **April 2009**  **Follow-up:** not applicable  **Mean age:**  33.5 (19; 68)  **Classification:**  Bethesda | **HIV+:** N=95  HSIL: N=1 | Not Included in risk estimate pooled analysis - Cannot reproduce 2x2 table |
| **Biggar et al., 2011**  **USA**  **Retrospective** | **Inclusion:**  age ≥15 years, with AIDS diagnosed from January 1, 1990, through December 31,  2002, who had CD4 counts available for their AIDS-onset period (i.e., from 6 months before to 3 months after their AIDS diagnosis).  **Exclusion**: not specified  **Sample:** HIV cohort matched with cancer registries | HIV/AIDS Cancer Match (HACM) Study links population-based HIV and cancer registries | **Study duration:**  Jan 2002 to Dec 2005  **Follow-up:** 2 years  **Mean age:** only reported by age category  **Classification:** ICD-O-3, C53 and behavior code 3 (invasive cancer) | **HIV+:** N= 69 548  ICC: N=724 | Not Included in risk estimate pooled analysis - Cannot reproduce 2x2 table |
| **Pinto et al., 2011**  **Brazil**  **Cross-sectional** | **Inclusion:** HIV+  **Exclusion:**  no early gynecologic follow-up, did not receive ART, and HIV infection acquired by vertical transmission and did not report sexual activity.  **Sample:** Cohort | Reference and Training Center for Sexually Transmitted Diseases and AIDS in the city of Sao Paulo, Brazil | **Study duration:**  Jul 2008 and May 2009  **Follow-up:** not applicable  **Mean age:** only reported by age category  **Classification:** Bethesda | **HIV+:** N=631  HSIL: N=63 | Not Included in risk estimate pooled analysis - Cannot reproduce 2x2 table |
| **Shiels et al., 2011**  **USA**  **Retrospective cohort** | **Inclusion:** HIV+  **Exclusion**: not specified  **Sample:** HIV cohort matched with cancer registries | HIV/AIDS Cancer Match (HACM) Study links 15 US population-based HIV and cancer registries | **Study duration:**  1991–1995 (pre-HAART), 1996–2000 (early-HAART), and 2001–2005 (late-HAART).  **Follow-up:**  1991–1995: 771 517 person-years  1996–2000: 1 326 055 person-years  2001–2005: 1 857 984 person years  **Mean age:** only reported by age category  **Classification:** not specified | **HIV+:** N: not reported  ICC:  1991–1995: N=327  1996–2000: N=419  2001–2005: N=530 | Not Included in risk estimate pooled analysis - Cannot reproduce 2x2 table |
| **Teixeira et al., 2011**  **Brazil**  **Cross-sectional** | **Inclusion:**  HIV infection by two positive HIV tests: ELISA and western blot; ≥ 18 years old; signed informed consent  **Exclusion:** difficulties in obtaining information; unanalyzable samples; pregnant women; history of hysterectomy.  **Sample:** cohort | Health units from five  different cities in Minas Gerais, Brazil | **Study duration:** 1998 - 2008  **Follow-up:** not applicable  **Median age:**  was 34 (18 to 71)  **Classification:**  Bethesda | **HIV+:** N=494  HSIL: N=8  CIN2/3 =30  ICC: N=1 | Not Included in risk estimate pooled analysis - Cannot reproduce 2x2 table |
| **Vogel et al., 2011**  **Germany**  **Retrospective cohort** | **Inclusion:** HIV patients  **Exclusion**: not specified  **Sample:** HIV cohort | Bonn HIV cohort reference population: saarland Cancer Registry | **Study period:** Jan 1996 – Dec 2008  **Follow-up:** 8,772 person-year  **Mean age:** not reported for women  **Classification:** ICD-9 180, 233.1 | **HIV+: N=280**  ICC: N=6 | ICC: SIR = 4.0 (1.5; 7.9)  ICC estimate risk was added in comparative pooled estimate |
| **Zhang et al., 2011**  **China**  **Retrospective cohort** | **Inclusion:** HIV patients  **Exclusion:** not specified  **Sample:** HIV cohort matched with cancer registries | Centre of AIDS prevention and cure of Zhongnan Hospital, Wuhan Cancer Registry | **Study period:** 2004 - 2008  **Follow-up:** Not reported for female only  **Mean age:** not reported for women  **Classification:** ICD-10-C53 | **HIV+: N=1 599**  ICC: N=14 | ICC: SIR = 68.1 (19.2; 84.5)  ICC estimate risk was added in comparative pooled estimate |
| **Buchacz et al., 2010**  **USA**  **Prospective cohort** | **Inclusion:** HIV+, informed consent, seen twice between 1 January 1994 to 31  December 2007  **Exclusion:** not specified  **Sample:** cohort | HIV Outpatient Study (HOPS) included 12 clinics | **Study duration:**  1994–1997 (pre-cART), 1998–2002 (early  cART),  2003–2007 (contemporary cART)  **Follow-up:** 35 236 person-year  **Median age:**  38 years  **Classification:** not specified | **HIV+:** N=8027  ICC: rates per 1000 person-years  1994–1997: N=4  1998–2002: N=2  2003–2007: N=10 | **ICC: per 1000 person-years**  IR: 1994–1997: 3.5 (1.0–8.9)  IR: 1998–2002: 0.7 (0.1–2.7)  IR: 2003–2007: 3.5 (1.7–6.5)  ICC estimate risk was added in comparative pooled estimate |
| **Oliveira et al., 2010**  **Brazil**  **Cross-sectional** | **Inclusion:** ≥18 years, sexually active and serologically positive for HIV (for the  HIV group) or negative (for the control group).  **Exclusion:** pregnancy or postpartum status, use of vaginally applied medication over the three days prior to cytological sample collection, sexual intercourse or recent douching over the 48 hours preceding the examination, or vaginal bleeding.  **Sample**: cohort | Gynecological Outpatient Clinic of the Bahia Foundation for Science Development | **Study duration:** May 2006 - May 2007  **Follow-up:** not applicable  **Mean age: HIV+:** 30.4 ± 5.5; HIV-: 28.6 ± 5.9  **Classification:** Bethesda | **HIV+: N=64**  ICC: N=4  CIN2 : N=5  CIN3 : N=1  **HIV-: N=76**  ICC: N=1  CIN2 : N=2  CIN3 : N=1 | ICC, CIN2, CIN3 entered with 2x2 table in pooled comparative analysis |
| **Bedimo et al., 2009**  **USA**  **Retrospective cohort** | **Inclusion:** cancer patients  **Exclusion:** not specified  **Sample**: Matched 1:2 based on age, sex, race, geographic location, and in care in the same year. | VA national administrative data matched to VACS Virtual Cohort | **Study duration:** Oct 1996 - Sept 2004  **Follow-up:** not applicable  **Mean age:** HIV+: 45.8 ± 10.0 HIV-: 46.1 ± 10.1  **Classification:** ICD-9 | **HIV+: N=724**  ICC: N=12  **HIV-: N=1 430**  ICC: N=2 | ICC: IRR = 12.8 (2.9; 57.3)  ICC estimate risk was added in comparative pooled estimate |
| **Chaturvedi et al., 2009**  **USA**  **Retrospective cohort** | **Inclusion:** 15 years or older who were diagnosed with AIDS  **Exclusion:** not specified  **Sample:** HIV cohort matched with cancer registries | U.S. HIV/AIDS Cancer Match (HACM) | **Study period:** 1980–2004  **Follow-up:** 10 years  **Mean age:** not reported for women  **Classification:** ICD-O-3 codes C530 – 539 | **AIDS: N=96 303**  ICC: N=192  In situ: N=324 | ICC  SIR = 5.6 (4.8; 6.5)  In situ:  SIR = 8.9 (8.0; 9.9)  ICC estimate risk was added in comparative pooled estimate |
| **Massad et al., 2009**  **USA**  **Prospective cohort** | **Inclusion:** HIV+  **Exclusion:** hysterectomy; not included in the cancer registry matching, no follow-up, prior history of cervical cancer at baseline or had cervical cancer diagnosed on evaluation of  an abnormal Pap test obtained at the entry visit  **Sample:** Cohort | Women’s Interagency  HIV Study (WIHS)  Compared to the general population with Surveillance Epidemiology and End Results  database | **Study duration:** 1994-2006  **Follow-up:** HIV+: 10.3 years, HIV-: 11.3  **Medium age**: HIV+: 35.8  HIV-: 34.3  **Classification:** cytology | **HIV+: N=** **1 760**  ICC: N=3  **HIV-: N=472**  ICC: N=0 | ICC: SIR: 1.32 (0.27; 3.85)  ICC estimate risk was added in comparative pooled estimate |
| **Silverberg et al., 2009**  **USA**  **Retrospective cohort** | **Inclusion:** HIV-infected, ≥18 years of age and active Kaiser Permanente health plan members  **Exclusion:** based on entry and exit dates  **Sample:** HIV-uninfected persons were then frequency-matched 10:1 by index year, age on December 31 of the index year (5-year age groups), sex, and medical center | Kaisers Permanente Northern and Southern Californian (KPNC) HIV Registry *linked to* KPNC and Kaiser Permanente Southern California KPSC cancer registries. | **Study duration:** 1996-2007  **Follow-up:** not reported  **Mean age: HIV+:** 40.9 ± 9.7; HIV-: 40.6 ± 9.9  **Classification:** not specified | **HIV+: N=1 935**  ICC: N=2  **HIV-: N=19 322**  ICC: N=6 | ICC: RR = 2.9 (0.5; 16.2)  ICC estimate risk was added in comparative pooled estimate |
| **Boardman et al. 2008**  **USA**  **Cross-sectional** | **Inclusion:** women who underwent colposcopic evaluation  **Exclusion**: no biopsy taken, insufficient tissue on biopsy for analysis, or interval between the initial referral cytology and the histologic sample ≥ 12 months  **Sample:** matched by referral cytology | Colposcopy Clinic at Women and Infants’ Hospital in Providence, Rhode Island | **Study duration:**  Aug 1999-May 2006  **Follow-up:** not applicable  **Mean age:** HIV+: 37.5 (range 17–56 years); HIV-: 23.0 (15–59 years)  **Classification:** Bethesda | **HIV+: N=72**  CIN2+: N=11  **HIV-: N=360**  CIN2+: N=48 | CIN2+ entered with 2x2 table in pooled comparative analysis |
| **Chaturvedi et al., 2008**  **USA**  **Retrospective cohort** | **Inclusion**: 15 years or older who were diagnosed with AIDS  **Exclusion:** not specified  **Sample:** HIV cohort matched with cancer registries | U.S. HIV/AIDS Cancer Match (HACM) | **Study period:** 1980 and 2002  **Follow-up:** not reported  **Mean age:** not reported  **Classification**: not specified | **AIDS: N=96 303**  ICC: N=74 | ICC: SIR = 4.9 (3.8; 6.1)  ICC estimate risk was added in comparative pooled estimate |
| **Denny et al., 2008**  **South Africa**  **Prospective cohort** | **Inclusion:** HIV+, signed informed consent  **Exclusion:** not specified  **Sample:** cohort | Primary health care clinic, and colposcopy clinic at  Groote Schuur Hospital in Cape Town, South Africa | **Study duration:** Mar 2002- Jan 2003  **Follow-up: 36** months  **Mean age:** 29.3 (range: 18-54)  **Classification:** Bethesda | **HIV+:** N=397  ICC: N=0  HSIL: N=50 | Not Included in risk estimate pooled analysis - Cannot reproduce 2x2 table |
| **Engels et al., 2008**  **USA**  **Retrospective cohort** | **Inclusion:** never reported to develop AIDS or had an HIV diagnosis date and HIV report date that both preceded their AIDS diagnosis date by at least 3 months.  **Exclusion:** cancer rates were not available  **Sample:** HIV cohort matched with cancer registries | HIV/AIDS Cancer Match (HACM) | **Study period:** 1991–2002  **Follow-up:** 3.2 years  **Median age:**  35.8 years  **Classification:** ICD-0-3 | **HIV+:** N= 19 785  ICC: N=28 | ICC: SIR=2.9 (1.9; 4.2)  ICC estimate risk was added in comparative pooled estimate |
| **Lehtovirta et al., 2008**  **Finland**  **Retrospective cohort** | **Inclusion:** HIV-infected women  **Exclusion:** hysterectomy and women who attended only one follow-up visit  **Sample:** cohort | Department of Obstetrics and  Gynaecology, University of Helsinki, | **Study duration:**  1989 and 2006  **Follow-up**: 5.6 ± 3.8 years  **Mean age**: 30.0 ± 6.8 years  **Classification:** Cytology | **HIV+: N=153**  CIN2+: N=28 | Not Included in risk estimate pooled analysis - Cannot reproduce 2x2 table |
| **Stein et al. 2008**  **South Africa**  **Case-control** | **Inclusion:** Women ≥ 18 years old  **Exclusion**: Not specified  **Sample:** patients with cardiovascular diseases at the same hospitals were included to serve as controls. | Medical, surgical, radiation therapy and oncology wards of Chris Hani-Baragwanath, Hillbrow and New Johannesburg hospitals | **Study duration:** 1998 to 2001  **Follow-up:** not specified  **Mean age:** only reported by age category  **Classification**: ICD-O-C53 | **HIV+: N=not specified** ICC: N= 1 586 | OR = 1.7 (1.4; 2.0)  Odds ratio adjusted for age group, sex (except for cervical cancer) and year of diagnosis  ICC estimate risk was added in comparative pooled estimate |
| **Galceran et al. 2007**  **Spain**  **Retrospective cohort** | **Inclusion**: 15 - 69 year, AIDS patients from two geographic areas. AIDS patients from ±5 years around the date of their AIDS diagnosis  **Exclusion:** not specified  **Sample:** linked with population-based Cancer Registries | AIDS Registry | **Study period:**  1981–1998 for Tarragona  1994–1999 for Girona  **Follow-up:** 6.1 years (7050 person-year)  **Mean age:** reported by category  **Classification:** ICD-10 | **AIDS: N=45**  Invasive cancer: N=10  In situ: N=16 | Invasive cancer:  1981-1996: SIR=41.9 (17.9; 82.9)  1997-1999: SIR=23.8 (11.8; 42.7)  In situ:  1981-1996: SIR = 37.4 (3.6; 138.8)  1997-1999: SIR = 28.5 (9.0; 67.2)  ICC estimate risk was added in comparative pooled estimate |
| **Sirivongrangson et al., 2007**  **Thailand**  **Prospective cohort** | **Inclusion:** HIV+, signed informed consent  **Exclusion:** not specified  **Sample:** cohort | Infectious disease clinic or a sexually transmitted infection (STI) clinic in Bangkok | **Study duration:**  Jul 2003- Feb 2004  **Follow-up:** not applicable  **Median age:**  Infectious disease clinic: 30.5 years and STI clinic: 33.0  Years  **Classification:** Bethesda and cytology | **HIV+: N=210**  HSIL : N=9  ICC: N=4  CIN2+ : N=6  Cacinoma in situ : N=1 | Not Included in risk estimate pooled analysis - Cannot reproduce 2x2 table |
| **Anderson et al. 2006**  **USA**  **Retrospective cohort** | **Inclusion**: HIV+ status within the previous 60 days or consent to HIV testing as part of screening, age of 16–55 years, and history of either injection  drug use since 1985 or risky sexual behaviors, at least 1 study visit during which they underwent Pap testing and colposcopy.  **Exclusion:** hysterectomy  **Sample:** linked with population-based Cancer Registries | Baltimore HERS site | **Study duration:** Apr 1993 to Jan 1995  **Follow-up:** semi-annually from 1993 through 1999  **Median age:** HIV+: 34.1 ± 6.2, HIV-: 32.6 ± 6.1  **Classification:** Bethesda | **HIV+: N=189**  CIN2+: n/a per patient  **HIV-: N=95**  CIN2+: n/a per patient | CIN2+ not included in risk pooled analysis not patient denominator but per pap smear |
| **Di Stefano et al., 2006**  **Italy**  **Cross-sectional** | **Inclusion:** HIV+, written consent  **Exclusion**: not specified  **Sample:** cohort | Colposcopy center for the evaluation of cervical vaginal disease with the infection’s disease department and the center of anatomopathological and Histology of the Salvatore Hospital | **Study duration:** Dec 2001 to Jan 2004  **Follow-up:** not applicable  **Mean age:** 32 (range 21 to 45) years  **Classification:** Bethesda | **HIV+: N=58**  HSIL: N=16 | Not Included in risk estimate pooled analysis - Cannot reproduce 2x2 table |
| **Engels et al., 2006**  **USA**  **Retrospective cohort** | **Inclusion:** Age > 14 years  **Exclusion:** overlapping period of cancer registration  **Sample**: HIV cohort matched with cancer registries | HIV/AIDS Cancer Match (HACM) | **Study period:** 1980–2002  **Follow-up**: 3.2 years  **Median age:**  1980-1989: 36.2 years  1990-1995: 37.7 years  1996-2002: 39.3 years  **Classification:** ICD-0-3 | **HIV+:** N=71 564  ICC: N=74 | ICC:  1980-1989- SIR=7.7 (3.7; 14.1)  1990-1995 - SIR=4.2 (2.9; 5.8)  1996-2002 –SIR=5.3 (3.6; 7.6)  ICC estimate risk was added in comparative pooled estimate |
| **Harris et al., 2006**  **USA**  **Prospective cohort** | **Inclusion**: normal cytology at baseline, written consent  **Exclusion:** baseline Pap smear was abnormal, missing information on baseline HPV status, did not have an intact cervix at baseline, follow-up data were unavailable, HIV-seroconverted during follow-up  **Sample:** linked with population-based Cancer Registries | WIHS | **Study duration:** 1994-1995  **Follow-up:** median of 7 years  **Mean age: HIV+:** 36 years (range 18-66 years) **; HIV-:** 34 years (range 17-55 years)  **Classification:** Bethesda | **HIV+: N=855**  ICC: N=0  HSIL+: N=5  **HIV-: N=343**  ICC: N=0  HSIL+: N=0 | ICC and HSIL entered with 2x2 table in pooled comparative analysis |
| **Heard et al., 2006**  **France**  **Prospective cohort** | **Inclusion:** HIV+, with normal PAP smear and normal colposcopic findings at enrollment, consent  **Exclusion**: no follow-up data or unavailable.  **Sample:** cohort | Outpatient clinic of the HIV department | **Study duration:** Jun 1993-Dec 2005  **Follow-up:** median 28 months (16-52), 1,013 person-years  **Median age:** 33.3 IQR (28.5; 37.7) years  **Classification:** Bethesda | **HIV+: N=298**  HSIL: N=13  ICC: N=0 | Not Included in risk estimate pooled analysis - Cannot reproduce 2x2 table |
| **Clifford et al., 2005**  **Switzerland**  **Prospective cohort** | **Inclusion:** HIV infection, 16 to 69 years old  **Exclusion:** not report a legal residence, no name available for linkage, were not followed in the SHCS during periods with complete  data  **Sample**: 1:4 randomly matched to the case group by sex, age, and year of enrollment (year of HIV diagnosis). | Swiss HIV Cohort Study (SHCS)  and Swiss cantonal cancer registries | **Study period:** Jan 1985 to Jan 2003  **Follow-up:** 3.9 years  **Mean age:** not reported  **Classification:** ICD10- C53 | **HIV+: N=2 045**  ICC: N=6 | ICC: SIR = 8.0 (2.9; 17.4)  ICC estimate risk was added in comparative pooled estimate |
| **Newnham et al., 2005**  **England**  **Retrospective cohort** | **Inclusion:** 15– 59 years, resident in the TCR catchment area and had no cancer before 1985.  **Exclusions:** based on entry and exit dates  **Sample**: HIV cohort matched with cancer registries | HIV registry: Communicable Disease Surveillance Centre’s national HIV database (CDSC)  Cancer registry: the Thames Cancer Registry (TCR) | **Study period:** 1985–2001  **Follow-up:** 31 098 person-year  **Mean age:** not specified  **Classification**: ICD-C53 | **HIV +: N=7 110**  ICC: N=3 | ICC: SIR = 1.0 (0.2; 2.9)  ICC estimate risk was added in comparative pooled estimate |
| **Hessol et al., 2004**  **USA**  **Prospective cohort** | **Inclusion:** women with HIV infection and women at risk for acquiring HIV infection  **Exclusion:** clinical AIDS had been previously diagnosed or women with CD4 cell counts < 200/mm3 or 14%  **Sample**: Cancer were matched identified through the following methods and in this hierarchical order of priority: 1) searches of statewide cancer registries; 2) medical record confirmation of self-reported cancer diagnoses; and 3) WIHS-initiated gynecologic biopsies | Women’s Interagency HIV study cohort (WIHS) | **Study duration:** Oct 1994 to Nov 1995  **Follow-up:** 7909 person-year  **Mean age:** reported by category  **Classification:** not specified | **HIV+: N=396**  ICC: N=1  **HIV-: N=1 554**  ICC: N=0 | ICC; IRR: 0.8 (0.02; 2.9)  ICC estimate risk was added in comparative pooled estimate |
| **Allardice et al., 2003**  **Scotland**  **Retrospective cohort** | **Inclusion:** no history of ICC at enrollment. Only cases that had clear documentation of a histologic diagnosis of ICC were included.  **Exclusion**: Not specified  **Sample**: population based | Scotland’s HIV database linked to the Scottish Cancer Registry | **Study period:** 1981–1996 (before HAART era)  **Follow-up:** 4236 person-year  **Mean age:** not reported  **Classification:**  ICD-9 | **HIV+ (N= not reported)**  ICC: N=1 | ICC: SIR = 1.7 (0.04; 9.26)  ICC estimate risk was added in comparative pooled estimate |
| **Frisch et al., 2001**  **USA**  **Retrospective cohort** | **Inclusion**: Age 15-69 years with AIDS  **Exclusion:** not specified  **Sample:** HIV cohort matched with cancer registries | U.S. HIV/AIDS Cancer Match (HACM) | **Study period:** 1978–1996  **Follow-up:** Not specified  **Median age:** 35 (15-69)  **Classification:** ICDO | **AIDS: N=** **48 949**  ICC: N=46 | ICC: RR = 5.2 (3.8; 6.9)  ICC estimate risk was added in comparative pooled estimate |
| **Gallagher et al., 2001**  **USA**  **Retrospective cohort** | **Inclusion:** Age 15-69 years with AIDS  **Exclusion**: not specified  **Sample**: HIV/AIDS linked with cancer registry | HIV: New York City AIDS registries  Cancer: New York State Cancer Registry | **Study period:** 1981–1994  **Follow-up:** Not specified  **Mean age:** reported by category  **Classification:** ICD-9-180 and 233.1 | **AIDS: N=not reported**  ICC: N=133  In situ: N=240 | ICC: SIR = 7.9 (6.00; 9.36)  In situ: SIR = 5.2 (4.60; 5.90)  ICC estimate risk was added in comparative pooled estimate |
| **Phelps et al., 2001**  **USA**  **Prospective cohort** | **Inclusion:** Women were enrolled on the basis of  either injection drug-use risk or sexual risk. No woman had cancer diagnosed at the baseline evaluation.  **Exclusion:** Not specified  **Sample**: cohort | HERS and SEER cohort | **Study duration:** Apr 1993 - Mar 2000  **Follow-up:** 5 years (6488 person-years)  **Median range:** HIV+: 35 (16-55); HIV-: 34.5 (16-55)  **Classification: C**ytology | **HIV+: N=871**  ICC: N=5  **HIV-: N=439**  ICC: N=0 | ICC: IRR: 7.99 (4.67; 13.67)  ICC estimate risk was added in comparative pooled estimate |
| **Serraino et al., 1999**  **France/Italy**  **Prospective cohort** | **Inclusion:** women aged between 15 and 49 years who were IDU or who acquired HIV infection through heterosexual intercourse  **Exclusion:** not specified  **Sample:** linked with population-based registry | DMI-2 database (France), ISS cohort, (Italy) and San Patrignano (Italy) | **Study period:** Jan 1988 to Jan 1998  **Follow-up**: 11 380  **Mean age:** reported by category  **Classification: ICD-9, code 180** | **HIV + : N=2 952**  ICC: N=10 | ICC: SIR: 12.8 (6.6; 22.4)  ICC estimate risk was added in comparative pooled estimate |
| **Cooksley et al., 1999**  **USA**  **Retrospective cohort** | **Inclusion:** HIV women  **Exclusion:** not specified  **Sample:** linked with population-based registry | Houston Department of Health and Human Services (HDHHS) HIV/STD | **Study period**: 1975 and 1994  **Follow-up:** Not specified  **Mean age: Not reported:**  **Classification:** ICDO | **HIV +: N=14 611**  **ICC: N=13** | ICC: SIR = 2.50 (1.30; 4.30)  ICC estimate risk was added in comparative pooled estimate |
| **Mayans et al., 1999**  **Spain**  **Retrospective cohort** | **Inclusion:** Age 20-49 women with AIDS  **Exclusion:** not specified  **Sample:** linked with population-based registry | Catalan population-based cancer registry; Catalan AIDS registry | **Study period:** 1994-1996  **Follow-up:** 3 years  **Mean age:** not reported  **Classification:** not reported | **HIV +: N=823**  ICC: N=56 | ICC: IRR: 18.5 (11.2; 29.2)  ICC estimate risk was added in comparative pooled estimate |

| **Author**  **Year**  **Country**  **Study design** | **Study population inclusion/exclusion criteria**  **Study groups matching** | **Study cohort and data source** | **Study period**  **Follow-up length (Y/PY)**  **Mean age (years)**  **Classification** | **Exposed/Non exposed cases** | **Risk esitmate** |
| --- | --- | --- | --- | --- | --- |
| **Migrants** | | | |  |  |
| **Fink et al., 2023**  **USA**  **Retrospective cohort** | **Inclusion:** refugees and migrants  **Exclusion:** Not specified  **Sample:** Cohort | Electronic medical records from the refugee 's women health clinic (RWHC)  **Immigrants:** Refugees  **Comparator:** None | **Study period:** 2009-2015  **Follow-up:** 6-year  **Mean age:** 32.4 years (SD=9)  **Classification:** cytology | **Immigrants: N = 600**  ICC: N = 0  HSIL : N = 1 | Not pooled in analysis could not reproduce 2x2 |
| **Mohamed et al., 2023**  **USA**  **Retrospective cohort** | **Inclusion:** Somali (immigrants) and non-Somali populations in Olmsted County, Minnesota  **Exclusion:** Diagnosis codes with the description “in remission” or “relapse” | The Rochester Epidemiology Project is a medical records linkage system for people living in southern Minnesota medical records-linkage infrastructure for the years 2000–2020  **Immigrants**: Somali immigrants and refugees  **Comparator:** non-somali | **Study period:** 2000-2020  **Follow-up:** not reported  **Mean age:** reported only by category  **Classification:** ICD-9 and ICD-10 codes were used | **Immigrants:**  2000: N = 705  2010: N = 1 452  2020: N = 2 013  ICC: N= Not reported  **Comparator:**  2000: N = 65 021  2010: N = 74 374  2020: N = 79 015  ICC: N = Not reported | ICC: RR 0.44 (0.24, 0.72)  ICC estimate risk was added in comparative pooled estimate  Not pooled in analysis could not reproduce 2x2 |
| **Sarkeala et al. 2023**  **Denmark**  **Retrospective cohort** | **Inclusion:** women registered as residents in 1986–2019 in Denmark, 1973–2017 in Finland, 1986–2020 in Iceland and 1990–2015 in Norway  **Exclusion:** Women who emigrated within one year after immigration, and women with a missing or clearly incorrect history of residence were excluded  **Sample:** linked to cancer registry | Danish, Finnish, Icelandic and Norwegian national registries  **Immigrants**: non-Western immigrants were defined as individual women born outside the Nordic countries, Western and Southern Europe, Northern America, Australia and New Zealand  **Comparator:** non-immigrant | **Study period:** 1973–2020  **Follow-up**: 191 069 316 person year  **Mean age:** reported only by time interval  **Classification:**  ICD 10-C53 | **Immigrants:** N = Not reported  ICC: N = 773  **Comparator:** N = Not reported  ICC: N = 24 276 | RR= 0.94 (0.51; 1.72)  ICC estimate risk was added in comparative pooled estimate |
| **Battagello et al., 2022**  **Italy**  **Retrospective cohort** | **Inclusion:** All Italian and foreign women residing in Veneto region who were born between 1986 and 1992 and who had been invited for the first time by the screening programme between 2011 and 2017  **Exclusion**: HPV vaccination before the date of the screening invitation and Western country citizenship  **Sample:** linked to the national cancer register. | Regional Healthcare System, Veneto Cancer Registry,  cervical cancer screening databases  **Immigrant:** Foreign-born  **Comparator:** Italian resident in the Veneto region (North-Eastern Italy) | **Study period:** 2011-2017  **Follow-up:** 2 years  **Age**: not reported  **Classification**: Cytology | **Immigrants : N = 10 443**  CIN2: N = 75  CIN2+: N = 145  CIN3+: N = 70  **Comparison (Italian): N = 47 069**  CIN2: N = 368  CIN2+: N = 559  CIN3+: N = 191  Note: CIN2+, CIN3+ including cervical carcinoma | CIN2+ and CIN3+ entered with 2x2 table in pooled comparative analysis |
| **Lamminmaki et al., 2022**  **Finland**  **Retrospective cohort** | **Inclusion**: Immigrants: born in Russia or the former soviet union and registered as residents in Finland during the study period 1970–2017.  **Exclusion**: missing history of residence with emigration or death before 1973 or with immigration date registered as the last day of 2017, with diagnosis before the immigration date.  **Sample**: linked to cancer registry | The Digital and Population Data Services Agency, Statistics Finland, the Finnish  Cancer Registry (FCR), and the Mass Screening Registry.  **Immigrants:** Russia or the former soviet union born | **Study period:** 1973-2013  **Follow-up:** 765 331 person-years  **Mean age:** reported only by category  **Classification:** not reported | **Immigrants :** N = 53 317  ICC: N = 91  **Comparator**: None | SIR: 1.62 (1.30; 1.98)  SIR was adjusted for attained age and calendar period  ICC estimate risk was added in comparative pooled estimate |
| **Gleize et al., 2000**  **France**  **Retrospective cohort** | **Inclusion:** Native French Polynesia compared to immigrant populations  **Exclusion:** Not specified  **Sample:** linked to cancer registry | Cancer registry of French Polynesia.  Departmen**t of Public** Health of French Polynesia  **Immigrants:** Foreign-born  **Comparator:** Native French Polynesia | **Study period:** 1990-1995  **Follow-up:** Not applicable  **Mean age:** Immigrants: 30 yeas (SD not reported)  Comparator: 23 years (SD not reported)  **Classification:**  CIM9-180 | **Immigrants :** N = 10 732  ICC: N = 7  **Comparator :** N = 88 558  ICC: N = 90 | ICC entered with 2x2 table in pooled comparative analysis |
| **Aston et al., 2019**  **Canada**  **Retrospective cohort** | **Inclusion:** females with arrival in Ontario and who insured between July 1, 1991, and June 30, 2008, at age 20+.  Two female controls alive on the corresponding immigrant’s index date and not found in the immigration database between 1986 to 2010, on year of birth  **Exclusion:** Not specified  **Sample:** exposure- control 2:1  matching on the year of birth. Linked to the Ontario Cancer Registry | The Immigration, Refugees, and Citizenship Canada Permanent Resident Database (IRCC),  Registered Persons Database, Ontario Health Insurance Plan.  **Immigrant:** all immigrants  **Comparator:** Ontario, Canada general population | **Study period:** July 1991-June 2008  **Mean age**: reported by category  **Average follow-up time** Immigrants: 12.05 y and Comparator: 13.09 y  **Classification:**  ICD-10 C53 for ICC | **Immigrants:** **N = 651 863**  ICC: N = 934  **Comparator (**Ontario, Canada)**:**  N = 1 303 726  ICC: N = 2 383 | ICC: HR = 0.86 (0.80; 0.93)  ICC estimate risk was added in comparative pooled estimate |
| **Raz et al., 2019**  **Israel**  **Retrospective cohort** | **Inclusion**: I immigrated to Israel from the former Soviet Union between January 1, 1990 and December 31, 2000 compared to all Jewish Israeli born women 0–80 y old on January 1, 1990  **Exclusion:** women diagnosed with cervical cancer before study entry  **Sample:** linked to cancer registry | Population registry of the Ministry of Interior, Central Bureau of Statistics, Israel National Cancer Registry  **Immigrants:** Soviet Union immigrants to Israel  **Comparison:** Jewish Israeli born | **Study period:** Jan 1990-Dec 2010  **Follow-up:** immigrants: 16.2 ± 4.3 years  Comparator: 20.9 ± 1.3  **Mean age:** not reported at diagnosis  **Classification:** ICD-O-3 C53 | **Immigrants: N = 345 202**  ICC: N= 1 595  **Comparator: N = 1 141 236**  ICC : N = 6159 | HR = 1.27 (1.19; 1.36)  ICC estimate risk was added in comparative pooled estimate |
| **Gallo et al., 2017**  **Italy**  **Retrospective cohort** | **Inclusion:** 25–64 year- Italians and foreigner residents in Piedmont and who received at least one invitation to a cervical cancer screening test within the local programme during the period 2001–2013  **Exclusion:** Not reported  **Sample:** Screening invitation | Italian National Institute of Statistics  **Immigrants:** Foreign-born  **Comparator:** Italians born  **Note:** Foreigners from high income countries were include together with Italian women, as all these countries have a high socio-economical level. | **Study period:** 2001-2013  **Follow-up:** not applicable  **Mean Age:** reported only by category  **Classification:** not reported | **Immigrants: N =** **188 843**  ICC: N = 37  CIN2+: N = 827  CIN2: N = 312  CIN3: N = 478  **Comparator: N=** **1 986 685**  ICC: N = Not reported  CIN2+: N = Not reported  CIN2: N = Not reported  CIN3+: N = Not reported | ICC: SDR = 3.36 (2.48; 4.56)  ICC estimate risk was added in comparative pooled estimate  CIN2+ and CIN3+ not added in comparative analysis – cannot reproduce 2x2 table |
| **Campari et al., 2016**  **Italy**  **Retrospective cohort** | **Inclusion:** 25–64 years, resident in Italy who were born abroad.  **Exclusion:** not specified  **Sample:** Survey | The Osservatorio Nazionale Screening survey on quality assurance.  Aggregated data for each screening programme in Italy.  **Immigrant:** Foreign-born  **Comparator:** Italian born | **Study period:** Jan 2009- Dec 2011  **Follow-up:** not applicable  **Age:** reported stratified by 5 years  **Classification:** Cytology | **Immigrants : N = 220 456**  ICC: N = 39  HSIL: N = 1 042  **Comparator: N= 1 507 618**  ICC: N = 75  HSIL: N = 2827 | ICC: RR = 2.38 (1.58; 3.58)  HSIL: RR = 1.79 (1.67; 1.92)  ICC was added in the in pooled comparative analysis  HSIL entered with 2x2 table in pooled comparative analysis |
| **Campari et al., 2015**  Inf Agents Cancer  **Italy**  **Retrospective cohort** | **Inclusion:** 25–64 years, residents in Italy who were born abroad.  **Exclusion:** not specified  **Sample:** Survey, pilot study | The Osservatorio Nazionale Screening survey on quality assurance.  HPV DNA-based pilot programmes in Italy  **Immigrant:** Foreign-born  **Comparator:** Italian born | **Study period:** Jan 2009- Dec 2011  **Follow-up:** not applicable  **Mean Age:**  Immigrants: 43.3 years  Comparator: 46.7 years  **Classification:** cytology | **Immigrants: N = 9 680**  ICC: N = 3  HSIL: N = 42  **Comparator: N =** 72 176  ICC: N = 3  HSIL: N = 158 | ICC and CIN2+ entered with 2x2 table in pooled comparative analysis |
| **Felice et al., 2015**  **Italy**  **Retrospective cohort** | **Inclusion:** Resident women of Reggio Emilia province (Northen Italiy) compared to foreign women  **Exclusion:** Not specified  **Sample:** linked to the standard cancer registry information | Emilia Cancer Registry  **Immigrants:** Foreign-born  **Comparator:** Italians in the Reggio Emilia province  (Northern Italy) | **Study period:** 2002-2009  **Follow-up:** not applicable  **Age:** only reported by outcomes  **Classification:**  cytology | **Immigrants: N =** **6 387**  ICC: N = 17  CIN3: N = 145  **Comparator: N = 83 173**  CIN3: N = 865  ICC: N = 116  **Note:** CIN3 carcinoma in situ and ICC but was added to CIN3+ since proportion of ICC is expected to low. | ICC: SIR = 2.4 (1.4; 3.8)  CIN3: SIR = 1.2 (1.0; 1.4)  CIN3+ entered with 2x2 table in pooled comparative analysis  ICC was added in the in pooled comparative analysis |
| **Mousavi et al., 2015**  **Sweden**  **Retrospective cohort** | **Inclusion:** First generation immigrant to Sweden compared to Sweden born females.  **Exclusion: N**ot reported  **Sample:** linked to the Swedish Family-Cancer Database | Subdataset of the MigMed database at the Center for Primary Health Care Research at Lund University  **Immigrants:** First generation of immigrants to Sweden  **Comparator:** Sweden born | **Study period**: 1958-2008  **Follow-up:**  Immigrants: 12,695,227 person-year  Comparison: 157,306,953 person-year  **Median age:** immigration: 47.3 years  Comparator: 48.2  **Classification: ICD** 7 171 | **Immigrants:** N = Not reported  ICC: N = 1943  **Comparator:** N = Not reported  ICC: N = 2 075 | ICC: SIR = 0.97 (0.93; 1.02)  adjusted for age (5-year bands), period (10-year bands from 1958 to 2008),  ICC estimate risk was added in comparative pooled estimate |
| **Visioli et al., 2015**  **Italy**  **Retrospective cohort** | **Inclusion:** Aged 25–64 years, Italians or legal immigrants, resident in the Florence district (Central Italy)  **Exclusion:** Not reported  **Sample:** linked to cytological laboratory | Florence Cervical Cancer Screening Program the archives of ISPO cytological laboratory and colposcopy service.  **Immigration:** Foreign-born  **Comparator:** Italian born | **Study period:** 2000–2002, 2003–2005, 2006–2008  **Follow-up:** not reported  **Mean age:**  Immigration: 44.3 (advanced development) and 39.8 high migration pressure  Comparator: 45,7years  **Classification:**  Cytology | **Immigrants:** N = 20 094  HSIL+ = 236  **Control**: N = 228 699  HSIL+ = 388 | HSIL+: OR= 2.22 (1.47; 3.36)  Adjusted by age (continuous variable) and a history of Pap test in the previous  5 years  CIN2+ entered with 2x2 table in pooled comparative analysis |
| **Winkler et al., 2014**  **Germany**  **Retrospective cohort** | **Inclusion**: Aussiedler from the Former Soviet Union who settled in the Federal State of Saarland between 1990 and 2005 and Saarland population as comparison group  **Exclusion:** Not reported  **Sample:** linked to cancer registry | Saarland Cancer  Registry, local refugee offices  **Immigrants**: German migrants (Aussiedler) from the Former Soviet Union  **Comparator:** Saarland population | **Study population** 1990-2009  **Follow-up:** 10.4 years or 100,294.3 person years  **Mean age:** not reported  **Classification:**  ICD 9-180 | **Immigrants:** N = 9 643  ICC: N = 12  **Comparator:** N = Not reported  ICC: N = Not reported | SIR = 0.92 (0.50; 1.57)  ICC estimate risk was added in comparative pooled estimate |
| **Williams et al. 2013**  **Netherlands**  **Retrospective cohort** | **Inclusion:** First generation surinamese migrant population residing in the Netherlands and the native Dutch population as comparison group  **Exclusion:** Not reported  **Sample:** Cancer registry | National cancer registries, national cause-of-death registry, Statistics Netherlands  **Immigrants:** First generation surinamese migrant in the Netherland  **Comparator:** native Dutch population | **Study period:** 1995-2004  **Follow-up:** not reported  **Mean age:** not reported  **Classification:**  ICD 10-C53 | **Immigrants:** N = Not reported  ICC: N = 153  **Comparator:** N = Not reported  ICC: N = Not reported | SIR = 1.88 (1.59; 2.19)  ICC estimate risk was added in comparative pooled estimate |
| **McDermott et al., 2011**  **Canada**  **Retrospective cohort** | **Inclusion:** Random sample of immigrants in Canada between January 1, 1980 and December 31, 1990.  Ex**clusion**: Illegal immigrants or those denied landed immigrant status. cancer diagnosis before immigration. Comparison group residents in Canada from 1980 to 1998  **Sample:** linked to cancer registry | Citizenship and Immigration Canada, Revenue, The Canadian Mortality Database, The Canadian Cancer Database.  **Immigrants**: Canadian immigrants stratified as refugees and non-refugees | **Study period**: Jan 1980-Dec 1990  **Follow-up: N**ot reported  **Mean age:** reported only by category  **Classification:** ICD 9 180-181 | **Immigrants (refugees)**: N = 53 355  ICC: N = 70  **Immigrants (non-refugees)**: N = 126 995  ICC: N = 126  **Comparator: None** | ICC : SIR : 1.07 (0.82; 1.32) - Refugees  ICC: SIR: 0.68 (0.56; 0.79) – non refugees  ICC estimate risk was added in comparative pooled estimate  For both groups |
| **Beiki et al., 2009**  **Sweden**  **Retrospective cohort** | **Inclusion:** > 15 years with known date of immigration Swedish-born women same age and with parents born in Sweden, alive and free of cancer at the start of the follow-up.  **Exclusion:** cancer diagnosis within one year after immigration.  **Sample:** linked to the national cancer register. | Population register held by Statistics Sweden, National Population and Housing Census, multi-generation register,  **Immigrant:** Foreign-born  **Comparator:** Swedish born | **Study period:** 1969-2004  **Follow-up:** 35 years  Immigrants: 9 873 543 person-years  Comparator: 107 246 414 person-years  **Mean age:**  Immigrants: 45.2 (SD 18.2)  Comparator : 60.3 (SD 22.8)  **Classification**: ICD-7 code 171 | **Immigrant:** N = 600 087  ICC: N = 1 177  **Comparator:** N = 4 751 448  ICC: N = 17 070 | ICC: SIR = 0.88 (0.83; 0.94)  Adjusted for age and calendar year of follow-up  ICC estimate risk was added in comparative pooled estimate |
| **Azerkan et al., 2008**  **Sweden**  **Retrospective cohort** | **Inclusion:** all residents of Sweden  **Exclusion:** <13 years by the end of the study period and > 80 years entry into the cohort, who died, emigrated or had a history of cervical cancer, immigrants without birthplace or migration date  **Sample**: linked to Swedish Cancer, Cause of death and Migration registers | Swedish Cancer, Cause of death and Migration registers, Swedish  Swedish Cancer Register  **Immigrant:** Foreign-born  **Comparator:** Swedish-born woman living in Sweden | **Study period:** 1968-1982  **Mean follow up:** Immigrants: 16.2 (SD 12.6) or 117,226,386 person-years Comparator: 24.7 (SD 12.1) or 12,276,871 person-year  **Mean age** 30.4 (SD15.0)  comparison group  Mean age 32.0 (SD 20.9)  **Classification:**  ICD-7 code 171 for ICC | **Immigrants:** N = 758 002  **ICC:** N = 1 991  **Comparator:** N = 4 737 549  **ICC:** N = 17 551 | ICC: RR = 1.13 (1.08; 1.18)  Adjusted for age and calendar period  ICC estimate risk was added in comparative pooled estimate |
| **Makoha et al., 2008**  **Saudi Arabia**  **Retrospective cohort** | **Inclusion:** Saudi nationals compared to non-Saudi Arabs (Arabian Peninsula and North Africa); Asians (Philippines, Indonesia, India and Pakistan); and Africans (sub-Saharan Africa)  **Exclusion:** arrived in the country before January 1985, demographic data was incomplete, or histology was inconclusive.  **Sample:** cohort | Maternity and Children’s Hospital  **Immigrants:** foreign migrants  **Comparator:** Saudi nationals | **Study period:** Jan 1985 - Dec 2004  **Follow-up:** Not reported  **Mean age:** Not reported  **Classification:** Not reported | **Immigrants :** N = 487  ICC : N = 236  **Comparator :** N = 229  ICC: N = 77 | ICC: IRR 1.44 (1.17; 1.88)  ICC estimate risk was added in comparative pooled estimate |
| **Hemminki et al., 2002**  **Sweden**  **Retrospective cohort** | **Inclusion:** First generation of immigrants to Sweden compared to Sweden native population  **Exclusion:** no reported  **Sample:** linked to cancer registry | Swedish Family-Cancer Database. The Swedish Cancer Registry  **Immigrants:** First generation of immigrants to Sweden | **Study period:** 1961-1998  **Follow-up:** 7 671 843 person years  **Mean age:** not reported  **Classification:** ICD-7 | **Immigrants : N=** 311 494  ICC: N=1067  **Comparator:** none | ICC: SIR 0.90 (0.85; 0.96)  ICC estimate risk was added in comparative pooled estimate |
| **Le et al., 2002**  **USA**  **Retrospective cohort** | **Inclusion:** Vietnamese in the US compared to US white population  **Exclusion:** not reported  S**ample:** linked to cancer registry | California Cancer Registry, National Cancer Institute’s Surveillance, Epidemiology and End Results (SEER).  **Immigrants:** Vietnamese in the US  **Comparator:** US white population | **Study period** 1988–1992  **Follow-up:** Not reported  **Mean age: N**ot reported  **Classification: N**ot reported | **Immigrants:** N = Not reported  ICC: N = 178  **Comparator:** N = Not reported  ICC: N = 7993 | Average annual age adjusted incidence rate per 100 000  Vietnamese 35.7 (30.4; 41.5)  USA reference 7.3 (7.2; 7.5)  ICC not included in comparative pooled analysis –insufficient data |
| **Parkin et al. 1997**  **France**  **Retrospective cohort** | **Inclusion:** Primary cancer before age 30  **Exclusion:** Women who emigrated within one year after immigration, and women with a missing or clearly incorrect history of residence were excluded  **Sample:** linked to cancer registry | Israel Cancer Registry  **Immigrants:** migrants and their offspring  **Comparator:** population living in Israel for at least 3 generations | **Study period:** 1960–1989  **Follow-up:** 30-year  **Mean age:** not reported  **Classification:**  ICD-O | **Immigrants:** N = Not reported  ICC: N = 24  **Comparator:** N = Not reported  ICC: N = 31 | RR reported for migrant born in 3 groups (Asia, Africa, Europe/America) and Isreal-born father born 3 groups with Israel as reference.  RR not included in comparative pooled analysis –insufficient data |
| **Grulich et al., 1995**  **Australia**  **Retrospective cohort** | **Inclusion:** Asian immigrants compared to Australian born residents  **Exclusion:** Not specified  **Sample:** linked to the standard cancer registry information | Central Cancer Registry, Australian Bureau of Statistics  **Immigrants:** Asian immigrants  **Comparator:** Australian born | **Study period:** 1972-1990  **Follow up:** Not applicable  **Mean Age:** reported only by category  **Classification**: ICD-9 180 | **Immigrants :** N = 69 773   ICC: N = 137  **Comparator:** N = 2 160 319  ICC: N = not reported | Not included in analysis. SIR was reported for every immigrant compared to Australian. Overall SIR not reported |
| **Tsugane et al., 1990**  **Brazil**  **Retrospective cohort** | **Inclusion**: Japan born immigrants compared to Sao Paulo general population. The cases born in Japan were selected from all registered cases from 1969 to 1978  **Exclusion:** not reported  **Sample:** Cancer registry | Cancer Registry of Sao Paulo  **Immigrants:** Japan born immigrants in Sao Paulo  **Comparator:** Sao Paulo general population | **Study period:** 1969 - 1978  **Follow-up:** Not reported  **Mean age:** reported only by category  **Classification:** ICD 8 180 | **Immigrants:** N = 25 272  ICC: N = 104  **Comparator:** N = Not reported  ICC: N = Not reported | IR = 18.0 (14.2; 21.8)  Adjusted by age  ICC estimate risk was added in comparative pooled estimate |
| **Prener et al., 1987**  **Denmark**  **Retrospective cohort** | **Inclusion:** Greenlandic Inuit migrants compared to Denmark population.  **Exclusion:** not living permanently in Denmark at the time of diagnosis  **Sample**: linked to cancer registry | The Central Population Registry, Danish Cancer Registry  **Immigrants:** Greenlandic Inuit migrants in Denmark  **Comparator:** Denmark population | **Study period:** 1968-1982  **Follow-up:** not reported  **Mean age:** reported only by time interval  **Classification:** ICD 7 171 | I**mmigrants** N = 6 469  ICC: N = 13  **Comparator:** N = not reported  ICC: N = not reported | ICC: RR = 1.9 (1.1; 2.9)  age-standardized incidence rate ratio;  ICC estimate risk was added in comparative pooled estimate |

| **Author**  **Year**  **Country**  **Study design** | **Study population inclusion/exclusion criteria**  **Study groups matching** | **Study cohort and data source** | **Study period**  **Follow-up length (Y/PY)**  **Mean age (years)**  **Classification** | **Exposed/Non exposed cases** | **Risk estimate** |
| --- | --- | --- | --- | --- | --- |
| **Women with Low SES (WLSES)** | | | | | |
| **Jansåker et al., 2022**  **Sweden**  **Retrospective cohort** | **Inclusion:** women living in Sweden >=15 years  **Exclusion**: diagnosis prior to baseline  **Sample:** linked to the national cancer register. | Total Population Register  Swedish cancer register  **Low socio-economic:**  1- low family income ((lowest income quartile of the study population)  2- ≤ 12 years educational level*  **Comparator:**  1- High family income (highest income quartile of the study population  2- >12 years educational level*  *For those aged 15–17  years, the highest educational  level of the parents was used | **Study period**: 2002-2018  **Follow-up**: 38.9 million person-years  **Mean age**: reported by category  **Classification:** ICD-7 code 171 | **1-low family income**  **Low SES (income):** N = 1 029 399  **ICC:** N = 1 281;  **In situ:** N = 18 373  **Comparator:** N = 1 030 352  **ICC:** N = 1 382  **In situ**: N = 12 517  **2-Educational level**  **Low SES (education)**  **≤ 12 years**  N = 2 718 970  **ICC:** N = 4 133  **In situ:** N = 41 652  **Comparator:** N = 1 401 587  **ICC:** N = 1 648  **In situ:** N = 20 597 | 1-low family income  ICC (Low (vs High)):  HR = 0.97 (0.90; 1.05)  aIR (/10 000 PY): 1.4 (1.4-1.5)  In situ Low (vs High):  HR = 1.54 (1.51; 1.58)  aIR (/10 000 PY): 20.7 (20.4-21)  2-Educational level  ICC (≤ 12 years (vs >12)  HR = 1.28 (1.21; 1.36)  aIR (/10 000 PY): 1.6 (1.6-1.7)  In situ (≤ 12 years (vs >12):  HR = 1.03 (1.02; 1.05)  aIR (/10 000 PY): 16.2 (16-16.3)  ICC estimate risk was added in comparative pooled estimate  CIN3+ estimate risk was added in comparative pooled estimate |
| **Ralli et al., 2021**  **Italy**  **Cross-sectional** | **Inclusion**: women consulting two primary care services  **Exclusion**: not reported  **Sample:** Prospective cohort | Eleemosynaria Apostolica and Medicina Solidale Center  **Low SES:** socioeconomically  disadvantaged neighborhoods | **Study period**: Sept 2019-Aug 2020  **Follow-up:** not applicable  **Mean age:** 38.1 (18-72) years  **Classification:** cytology | **Low SES:** N = 62  **HSIL:** N = 2  **Comparator:** None | Not Included in risk estimate pooled analysis - Cannot reproduce 2x2 table |
| **Liu et al., 2019**  **China**  **Cross-sectional** | **Inclusion** : women living in the rural poor of Heilongjiang province  **Exclusion:** Not reported  **Sample:** population registry | Health Poverty Alleviation Information System  **Low SES:** rural community | **Study period:** prevalence on October 1, 2018  **Follow-up: not applicable**  **Mean age:** reported by category  **Classification:** ICD-10 C53 for ICC | **Low SES:** N = 295 563  **ICC:** N = 432  **Comparator:** None | Not Included in risk estimate pooled analysis - Cannot reproduce 2x2 table |
| **Tao et al., 2018**  **China**  **Prospective cohort** | **Inclusion:** 1) married (proxy for having been sexually active in the  past or present) Uyghur women aged 30–59 years, 2) not pregnant,  3) no comorbidities that may prohibit screening–biopsy,  4) not screened for the past 5  Years  **Exclusion:** Not reported  **Sample:** Prospective cohort | Muslim Uyghur communities in China’s far western Kashi Prefecture  **Low SES**: 1) geographically  remote, 2) economically underdeveloped, and 3) medically underserved. | **Study period** : Nov 2011-Aug 2014  **Follow-up** : not applicable  **Mean age:** not reported  **Classification:** Cytology | **Pilot Cohort**  **Low SES: N= 1 967**  CIN2: N=20  CIN2+: N=36  CIN3 : N=8  CIN3+: N=16  ICC: N=8  **Validation cohort**  **Low SES: N=2082**  CIN2: N=19  CIN2+: N=39  CIN3 : N=12  CIN3+: N=20  ICC: N=8  **Comparator :** None | Not Included in risk estimate pooled analysis - Cannot reproduce 2x2 table |
| **Luce et al., 2017**  **France**  **Retrospective cohort** | **Inclusion:** ICC  **Excluded:** not specified  **Sample:** population-based cancer registry and linked with census | Guadeloupe and Martinique Cancer registries  Census from French National Institute for Statistics and Economic Studies  **Low SES:**  1- high deprivation category  **Comparator:**  1- low deprivation category | **Study period: Jan** 2009 - Dec 2010  **Follow-up:** not reported  **Mean age:** not reported  **Classification:** CD-10 (C53) | **N= not reported**  **Low SES**  ICC N=28  **Comparator**  ICC: N=35 | ICC estimate risk was added in comparative pooled estimate  **Incidence Low SES**  (Low deprivation category vs high deprivation category)  **ICC:** RR=1.13 (0.63; 2.01) |
| **Whop et al., 2016**  **Australia**  **Retrospective cohort** | **Inclusion:** 20-69 yo with at least one Pap smar during the study period  **Exclusion:** missing data on residence or pap smears  **Sample:** linked records from the Queensland national system  of state-based Pap Smear Registers and the Queensland Hospital | Queensland PSR: data of place of birth Queensland hospital admitted patient data collections (QHAPDC): medical records  **Low SES:**  1-Q1 (most deprived areas)  2-Place of residence: remote/ very remote  **Comparator:**  1-Q5 (most affluent area)  2-place of residence: inner regional | **Study period:** 2000-2011  **Follow-up:** not reported  **Mean age:** reported by category  **Classification:** Cytology  High grade includes: prediction of CIN 2 or higher, adenocarcinoma in situ, or invasive cancers [includes previous terminology of atypical  squamous cells, possible high-grade lesion]) | **1-low SES (deprived area)**  **N = 526 107**  **High grade:** N = 6 903  **Comparator:**  **Q5:** N = 861 746  **High grade**: N = 9 546  **2-Area**  **Remote:** N = 40 025  **High Grade:** N = 1 897  **Comparator:** N = 909 043  **High grade:** N = 11 205 | Included in the High grade (CIN2+) entered with 2x2 table in pooled comparative analysis |
| **Garcia-Gil et al., 2014**  **Spain**  **Retrospective cohort** | **Inclusion:** ICC from urban areas  **Exclusion:** rural cases  **Sample:** linked records to cancer registry | SIDIAP: The Information System for the Development of Research in Primary Care -Deprivation index: MEDEA score  **Low SES:**  1-Q5 (most deprived areas)  **Comparator:**  1-Q1 (least deprived area) | **Study period:** 2009-2012  **Follow-up:** not reported  **Mean age:** not reported for women group  **Classification:** CD-10 (C53 for cervical) | **N=1 887 596**  ICC: not reported | ICC estimate risk was added in comparative pooled estimate  **Incidence - Low SES:**  (5th quintile vs 1st quintile)  aIRR (crude)= 1.22 (1.07; 1.38) |
| **Prummel et al., 2014**  **Canada**  **Retrospective cohort** | **Inclusion:** ICC  **Excluded:** adenosquamous carcinomas  **Sample:** population-based cancer registry and linked with census for risk incidence calculation | Ontario cancer registry  Canadian census  **Low SES:**   1. Income (Q1) 2. Rural or small town   **Comparator:**   1. Income (Q5) richest 2. Urban | **Study period: 1991 – 2009**  **Follow-up:** not reported  **Mean age:** not reported  **Classification:** CD-10 (C53) | **1-Low SES (income)**  **N=Not reported**  **Low SES**  ICC: N=426  **Comparator:**  ICC: N=423  2-Low SES (rural)  Low SES: N=261  Comparator:  ICC: N=1835 | ICC estimate risk was added in comparative pooled estimate  Incidence Low SES (Low income versus high income)  Low income: RR= 0.99 (0.86; 1.15)  Rural: RR=0.99 (0.83; 1.09) |
| **Hopenhayn et al., 2008**  **USA**  **Retrospective cohort** | **Inclusion:** women population in 5 US Appalachian states  **Exclusion:** registries not meeting standard quality  **Sample:** records linked between 5 population cancer registries (NPCR) to sociodemographic information (SEER) | NPCR: cancer cases  SEER: sociodemographic data  **Low SES:**   1. Deprived areas (Appalachian) 2. Rural areas   **Comparator:**  1- Affluent areas (non appalachian)  2- Urban areas | **Study period**: 1998-2003  **Follow-up:** 6 years  **Median age:** reported by category  **Classification:** ICC | **1-Deprived areas:**  **N= 6 719 046**  ICC: n= 4034  **Comparator: non-Appalachian**  **N= 10 791 046**  ICC = 5648  **2-Rural areas:**  **Urban areas:**  **Age adjusted IR: 8.4 [8.2-8.6]** | ICC estimate risk was added in comparative pooled estimate |
| **Kaneko et al. 2022**  **Japan**  **Retrospective cohort** | **Inclusion :** incident cancer cases in Miyagi prefecture  **Exclusion**: non geocoded addresses, small subregions or without general households  **Sample** : records linked from Miyagi prefectural cancer registry to subregion cenus data | Miyagi prefectural cancer registry : cancer cases  Subregion census: sociodemographic data  **Lox SES** :  Most deprived areas (5th quintile : Q5)  **Comaprator**  Least deprived areas (1st quintile: Q1) | **Study period :** 2005-2010  **Fllow-up** : not reported  **Classification** : carcinoma insitu , ICC | **Deprived areas (Q5) :**  ICC: N= 176  Carcinoma insitu : N= 374  **Comaprator (Q1) :**  ICC: N= 121  Carcinoma in situ : N=304 | ICC and HGL estimates risk were added in comparative pooled estimate  **Carcinoma in situ**  RR= 1.29 [1.11-1.5]  **CC**  RR= 1.39 [1.1-1.75] |

| **Author**  **Year**  **Country**  **Study design** | **Study population inclusion/exclusion criteria**  **Study groups matching** | **Study cohort and data source** | **Study period**  **Follow-up length (Y/PY)**  **Mean age (years)**  **Classification** | **Exposed/Non exposed cases** | **Risk estimate** |
| --- | --- | --- | --- | --- | --- |
| **FEMALE SEX WORKERS (FSW)** | | | | | |
| **Bristow et al., 2019**  **Mexico**  **Prospective cohort** | **Inclusion**: FSW, age ≥ 18, biologically female, agreed to receive treatment for any STIs detected, resided in Tijuana, reported having exchanged sex for money or goods in the past month, and reported no plans to permanently move outside the city for the duration of follow-up  **Exclusions**: not reported  **Sample:** No comparison group | Mapa de Salud epidemiologic study, using modified time-location sampling in both indoor and outdoor sex work venues throughout Tijuana. | **Study period**: Mar 2013 - Mar 2014  **Follow-up**: 18 months  **Median age**: 32 (IQR: 25-40)  **Classification:** Bethesda | **FSW:** N=300  **CIN 2: N=5**  (mild dysplasia (n=3), moderate dysplasia (n=2))  **CIN2+: N=8**  (mild dysplasia (n=3), moderate dysplasia (n=2), moderate dysplasia, carcinoma in situ (n=1), carcinoma in situ, severe dysplasia (n=1), severe dysplasia (n=1)  **CIN3+: N=2**  carcinoma in situ, severe dysplasia (n=1), severe dysplasia (n=1)  **Comparator**: None | Not entered in comparative pooled analysis – no comparative group or estimate reported |
| **Richards et al. 2018**  **Dominican Republic**  **Cross sectional tudy** | **Inclusion:** FSW, ages 18–60 years, had exchanged sexual services for payment or gifts within the last six months and written consent  **Exclusion:** not specified  **Sample:** no comparison group | Clinic in La Romana, Dominican Republic | **Study period:** Jun 2015 – Apr 2016  **Follow-up**: Not applicable  **Average age:**  **Classification:**  Bethesda | **FSW: N=52**  **HSIL: N=3**  **Comparator**: None | Not entered in comparative pooled analysis – no comparative group or estimate reported |
| **Vorsters et al., 2016**    **Belgium**  **Nested case-control** | **Inclusion:** FSWs visiting the Ghapro clinic  **Exclusion:** Pregnant women, immunodeficiency conditions (i.e HIV), and without a reported age or date of birth  **Sample:**  A control group was selected from the same laboratory database (general female population).  matched 1:1 for age, testing date, and location (Antwerp region). | Sex workers Ghapro clinic. | **Study period** June 2006-June2010  **Follow-up**: not applicable  **Average age:** 29.1 (range, 17-70)  **Classification:** Bethesda | **FSW :**  **CIN2+ : N=27**  **Comparator:**  **CIN2+ : N=15** | CIN2+ (HSIL) :  OR = 1.8 (0.9; 3.4)  CIN2+ entered with 2x2 table in pooled comparative analysis |
| **Jia et al. 2015**  **China**  **Case-control** | **Inclusion: FWS,** mentally healthy and non-pregnant without structural and anatomic malformations in the reproductive tract and without a history of pelvic irradiation. They had not been screened for cervical neoplasia within five years prior to their police detainment.  **Exclusion:** not specified  **Sample:** Control was not match for cases | Han Chinese  **Case:** FSW detained for alleged engagement in illegal prostitution or sexual acts in public entertainment and leisure facilities by police in Shenyang, China.  **Control:** women who underwent free annual gynecologic examinations in the Department of Gynecological Oncology, Liaoning Provincial Cancer Hospital. | **Study period:** Oct - Dec, 2013  **Follow-up**: not applicable  **Average age:** not reported  **Classification:** Cytology | **FSW**: N=309  **CIN2: N=17**  **CIN3: N=9**  **Comparator**: N=1000  **CIN2: N=10**  **CIN3: N=5** | CIN2 and CIN3 entered with 2x2 table in pooled comparative analysis |
| **Joshi et al., 2015**  **India**  **Cross-sectional** | **Inclusion:** FSW, age 18- 60, sign informed consent form, nonpregnant, no history of prolapse, no history of treatment for cervical neoplasia, and having an intact uterus were enrolled in the study.  **Exclusion:** unsatisfactory cytology smears  **Sample:** no comparison group | Non-governmental organizations (NGOs) working in three high HIV-prevalent districts in Maharashtra (Pune, Sangli, and Ahmednagar), | **Study period:** Oct 2012 - Feb 2013  **Follow-up:** not applicable  **Mean age**: 33.6 (range, 21–58)  **Classification:** Bethesda | **FSW: N=296**  **ICC : N=0**  **CIN2: N=5**  **CIN3: N=9**  **Comparator**: None | Not entered in comparative pooled analysis – no comparative group or estimate reported |
| **Leung et al., 2013**  **China**  **Retrospective cohort** | **Inclusion:** FSW, Satisfactory Pap smear tests.  **Exclusion**: not reported  **Sample:** control group consisted of satisfactory Pap tests sent from regular referring clinicians during the same period.  Matched by age range | Private anatomical pathology laboratory, Hong Kong | **Study period:** 2006-2012  **Follow-up:** not applicable  **Mean age:** 37 (SD 7)  **Classification:** Bethesda | **FSW:** N=2697  **CIN2+: N=48**  (HSIL or squamous cell carcinoma)  **Comparator**: N= 476 066  **CIN2+: N=1943**  (HSIL or squamous cell carcinoma) | CIN2+ entered with 2x2 table in pooled comparative analysis |
| **Brown et al. 2012**  **Peru**  **Cross-sectional** | **Inclusion:** 1) Registered FSW in Lima 2) 18–26 years, 3) no reported immune deficiency (including HIV), 4) not pregnant or planning a pregnancy in the next seven months, 5) having a uterus and not having received HPV vaccine 6) written consent  **Exclusion:** not specified  **Sample:** no comparison group | FSW in Lima | **Study period:** Aug 2009 -Mar 2010  **Follow-up**: Not applicable  **Average age:** 23 (range 18-26)  **Classification:**  Bethesda | **FSW: N=199**  **HSIL: N=3**  **Comparator**: None | Not entered in comparative pooled analysis – no comparative group or estimate reported |
| **Vallès et al. 2009**  **Guatemala**  **Cross-sectional study** | **Inclusion:** women aged 18-49 years, signed consent form, not pregnant and did not have a contraindication for the Pap smear examination.  **Exclusion:** missing samples  **Sample:** General population | Population from Guatemala  **Comparator:** General population. Women that were attending health services, regardless of the reason for the visit, and who fulfilled the inclusion criteria | **Study period:** April- August 2007  **Follow-up**: not applicable  **Average age:** 29.7 for FSW and 27.3 for general population  **Classification:** Cytology | **FSW: N=292**  **HSIL: N=6**  **Comparator**: N=297  **HSIL : N=4** | HSIL entered with 2x2 table in pooled comparative analysis |
| **Wong et al. 2008**  **China**  **Cross-sectional** | **Inclusion:** FSW from Ziteng China  **Exclusion:** not specified  **Sample:** no comparison group | FSW from Ziteng China | **Study period: Jan 2004 to Dec 2005**  **Follow-up**: not applicable  **Average age:** Range from 20–57 years  **Classification:** Cytology | **FSW: N=236**  **CIN3: N=7**  (CIN2 and CIN3)  **Comparator**: None | Not entered in comparative pooled analysis – no comparative group or estimate reported |
| **Mak et al., 2004**  **Belgium**  **Prospective cohort** | **Inclusion**: FSW in the region of Ghent  **Exclusion:** not reported  **Samples:** An equal number of controls were selected from the routine screening data of 2001 from Ghent University Hospital (serving the population in the same area as where the sex workers were recruited). Matched for age | Ghent University Hospital | **Study period** 1992-2001  **Follow-up:** not applicable  **Mean age:** 28.1 (SD 7.7)  **Classification:** Bethesda | **FSW: N=652**  **CIN2+: N=19**  **Comparator**: N= 653  **CIN2+ : N=4** | CIN2+ (HSIL): OR = 4.86 (1.55; 16.97)  CIN2+ entered with 2x2 table in pooled comparative analysis |
| **Chan et al. 2001**  **Singapore**  **Cross-sectional** | **Inclusion:** FSW who came for their routine medical screening that gave informed consent  **Exclusion:** not reported  **Sample:** no comparison group | Sex workers in Singapore | **Study period:** April 1995-April 1996  **Follow-up**: not applicable  **Average age:** not reported  **Classification:** Cytology | **FSW: N=187**  CIN2: N=18  CIN3: N=4  **Comparator**: None | Not entered in comparative pooled analysis – no comparative group or estimate reported |
| **Ishi et al. 2000**  **Japan**  **Casse-control** | **Inclusion:** FSW who attended a sexually transmitted disease (STD)  **Exclusion:** not specified  **Sample:** Case for FSW with control | **FSW:** clinic in an entertainment area in Tokyo **Control:** Department of Obstetrics and Gynecology, Juntendo Urayasu Hospital, Juntendo University | **Study period:** 1998-1999  **Follow-up**: Not applicable  **Average age:** FSW: 28.9 ± 5.1 years; Comparator: 31.0 ± 6.5 years  **Classification:** Cytology | **FSW : N=546**  **CIN3+: N=39**  **Comparator**: N=233  **CIN3+: N=1** | CIN3+ entered with 2x2 table in pooled comparative analysis |
| **Gitsch et et al., 1991**  **Austria**  **Cross-sectional** | **Inclusions:** Registered prostitutes  **Exclusions:** not reported  **Sample**: compared to non-prostitute aged under 45 years with PAP test in cytological laboratory during 1988. | Second Department of Obstetrics and Gynecology, University of Vienna Medical School and STD Clinic of the Public Health Office, Vienna. | **Study period:** 1991  **Follow-up:** None (at first examination)  **Mean age:** Not reported  **Classification:** Cytology | **FSW: N=978**  **ICC: N=4**  **CIN3: N=23**  (Severe dysplasia)  **CIN3+: N=23**  (Severe dysplasia, assuming all lesions are reported)  **Comparator**: N=5493    **ICC: N=0**  **CIN3: N=20**  (Severe dysplasia)  **CIN3+: N=20**  (Severe dysplasia, assuming all lesions are reported) | ICC, CIN3 and CIN3+ entered with 2x2 table in pooled comparative analysis  **Note:** mild to moderate dysplasia was not extracted since overlap of CIN1 and CIN2  **Note: Incidence data also available for one year FU** |

| **Author**  **Year**  **Country**  **Study design** | **Study population inclusion/exclusion criteria**  **Study groups matching** | **Study cohort and data source** | **Study period**  **Follow-up length (Y/PY)**  **Mean age (years)**  **Classification** | **Exposed/Non exposed cases** | **Risk estimate** |
| --- | --- | --- | --- | --- | --- |
| **Women with Mental Illness (WMI)** | | | | | |
| **Bassal et al. 2023**  **Israel**  **Retrospective cohort** | **Inclusion:** age >= 21; diagnostic of depression  **Exclusion:** diagnosis of depression part of the syndrome  **Sample:** Linked to cancer registry | Maccabi Health Services database (covers 25% of the population); cancer cases: cancer registry  **Mental illness:** depression (ICD-09- 10) | **Study period:** Jan 1998-Sept 2017  **Follow-up:** not specified  **Mean age:** depressed: 68.9 ± 15.6’ control: 53.8 ± 19.2  **Classification:** | **Mental illness:**  **N= 14 204**  CIN3+: N=1 585  Includes carcinoma in-situ  **Comparison (non-depressed)**  **N= 337 476**  CIN3+: N=4 185 | Included in the CIN3+ entered with 2x2 table in pooled comparative analysis |
| **Cheng et al. 2023**  **Taiwan**  **Retrospective cohort** | **Inclusion:** diagnostic of schizophrenia  **Exclusion:** diagnosis of mood disorder  cancer diagnosis before exposure diagnosis  missing sex and age  **Sample:** Linked to cancer registry | Taiwan National health insurance database; Taiwan cancer registry  **Mental illness:** schizophrenia (ICD-9-CM; code: 295) and ICD-10-CM; code: F20) | **Study period:** Jan 2000-Dec 2019  **Follow-up:** total of 964 433 person-year  **Mean age:** 41.3 ± 18.4  **Classification:** ICD-9-CM-180 | **Mental illness:**  **N= 48 743**  ICC: N= 229 | ICC: SIR = 1.09 (0.96; 1.25)  ICC estimate risk was added in comparative pooled estimate |
| **Hu et al., 2023**  **Sweden**  **Nested case-control** | **Inclusion:** women with mental illness  **Exclusion:** CIN2+, ICC, other malignancy, 61st birthday, or total hysterectomy; emigration; death and end of study period  **Sample:** Linked to cancer registry | Swedish National Cervical Screening Registry and other population and health registers  **Mental illness:** severe mental illness (ie, diagnosed in specialised psychiatric care) | **Study period:** 1973-2018  **Follow-up:** not specified  **Mean age:** reported age at cancer diagnosis  **Classification:** cytology | **Mental illness:**  **N=** **129 265**  ICC: N=11 085  CIN2+: N=118 180  **Control (general population):  N =** **646 325**  **ICC:** N=55 425  **CIN2+: N=** 590 900 | ICC: HR=2.39 (2.22; 2.57)  CIN2+: HR=2.22 (2.18; 2.26)  ICC and CIN2+ estimate risk was added in comparative pooled estimate |
| **Wu et al., 2023**  **Taiwan**  **Retrospective cohort** | **Inclusion:** women born between  1940 and 1995 with mental illness  **Exclusion:** Invasive cervical cancer, other malignancy, or other censoring dates before cohort entry  **Sample:** Linked to cancer registry and general population | Swedish National Cervical Screening Registry; Swedish Cancer Register, Swedish Patient Register; Population Register  **Mental illness:** depressive disorder (ICD-9-CM  code 296.2, 296.3, 300.4 and 311), bipolar disorder (ICD-  9-CM 296.0, 296.1, 296.4, 296.5, 296.6, 296.7, 296.8,  296.80 and 296.89) and anxiety disorder (ICD-9-CM  300.0, 300.2, 300.0, 308.3 and 309.81), | **Study period:** 1973-2018  **Follow-up:** mental disorder: 7.1 ± 3.7; non-mental disorder:  7.1 ± 3.7  **Mean age:** mental disorder: 44.4 ± 16.2; non mental disorder: 44.3 ± 16.2  **Classification:** ICD-09-CM 180.9 and 233.1) | **Mental illness:**  **N=27 626**  ICC: N=117  **Control (non-mental disorder) :**  **N=110 504**  ICC: N=274 | ICC: aHR=1.76 (1.40; 2.19)  ICC estimate risk was added in comparative pooled estimate |
| **Wootten et al., 2022**  **Canada**  **Retrospective cohort** | **Inclusion:** People aged 14–59 with a first diagnosis of NAPD  **Exclusion:** < 14 at the index date due to low incidence of psychotic disorders, as well as those older than age 60 to avoid misclassified cases of dementia. non‐residents of Ontario diagnosed with cancer prior to the index date  **Sample:** comparison group selected a random sample from the general population who had not previously received a diagnosis of NAPD, frequency matched by age and sex at a ratio of 4:1; index dates were assigned at random | Population‐based health administrative data from Ontario, Canada  Mental illness: schizophrenia spectrum disorder (i.e.,  schizophrenia, schizoaffective disorder, schizophreniform) or psychosis not otherwise specified | **Study period:** Jan 1995-Dec 2004  **Follow-up:** Not specified  **Median age:** reported by category  **Classification:** Not specified | **Mental illness:  N=** **28 394**  ICC: N=76  **Control:**  **N=** **112 030**  ICC: N=212 | ICC: adjusted IRR 1.43 (1.1; 1.87)  ICC estimate risk was added in comparative pooled estimate |
| **Chen et al., 2016**  **Taiwan**  **Retrospective cohort** | **Inclusion:** age between 15 and 65 years old, schizophrenia  **Exclusion:** at least one psychiatric diagnosis at discharge of non-schizophrenia disorder (mainly mood disorder)  **Sample:** Linked to cancer registry | Psychiatric Inpatient Medical Claims database, a subset of the National Health Insurance Research Database  Mental illness: schizophrenia (ICD-9 CM code 295) | **Study period:** 2000–2010  **Follow-up:** not reported for women group  **Mean age:** reported by category  **Classification:** ICD-9-CM-180 | **Mental illness:  N = 14 760**  ICC: N=24 | ICC: SIR= 1.47 (1.22; 1.78)  ICC estimate risk was added in comparative pooled estimate |
| **Kisely et al., 2016**  **Australia**  **Retrospective cohort** | **Inclusion:** psychiatric who had a cancer diagnosed between July 2002 and December 2007  **Exclusion:** not specified  **Sample:** population-based record-linkage | QHPADC (inpatient inpatients receiving treatment in a public or private hospital); CESA (treatment in a public-sector community mental health  Service); Queensland Cancer Registry; Australian Bureau of Statistics  **Mental illness:** (ICD)-9 diagnosis of 290–319 or ICD-10 equivalent. Post-partum mental disorders (ICD-9 648.4), suicide and non-accidental injury (ICD-9 E950–959), as well as contact with the mental health system not covered by the above ICD-9 Chapter 5 diagnoses. | **Study period:** 2002-2007  **Follow-up:** not specified  **Mean age:** not specified for population  **Classification:** not specified | **Mental illness:**  N= not specified  ICC: N=42 | ICC: RR=1.36 (0.93; 1.78)  SR: 6.19 (4.57; 8.37)  ICC standardized rate was added in comparative pooled estimate |
| **Shen et al., 2016**  **Taiwan**  **Retrospective cohort** | **Inclusion:** Obsessive-Compulsive Disorder diagnosis  **Exclusion:** prior malignancies, diagnosis by other than clinical psychiatrist  **Sample:** population-based record-linkage | NHIRD: national health insurance research database  Mental illness: Obsessive-Compulsive Disorder (ICD-9-CM) code 300.3 | **Study period:** Jan 2002- Dec 2011  **Median:** Follow-up: 4.9 years (IQR: 2.5-7.5)  **Mean age:** 35 (IQR: 25–47)  **Classification:** not specified | **Mental illness:**  **N=** **26 776**  ICC: N=9  *Note: excluded cancer cases diagnosed within the first year of OCD | ICC: SIR= 0.53 (0.24; 1.01)  ICC estimate risk was added in comparative pooled estimate |
| **Ji et al., 2013**  **Sweden**  **Retrospective cohort** | **Inclusion:** diagnosis of schizophrenia  **Exclusion:** not specified  **Sample:** Linked to cancer registry and compared to the general population | Schizophrenia cases: swedish hospital discharge register; cancer cases: national cancer registry  **Mental illness:** schizophrenia 1965–1968: ICD-07-300; 1969–1986 ICD-08-295; 1987–1996: ICD-09-295;  1997-: ICD-10-F20 | **Study period:** 1965-2008  **Follow-up:** not specified  **Median age:** reported by category  **Classification** | **Mental illness:**  **N=27 029**  ICC: N=84 | ICC: SIR=1.39 (1.11; 1.72)  ICC estimate risk was added in comparative pooled estimate |
| **Yuan-Lin et al., 2013**  **Japan**  **Retrospective cohort** | **Inclusion:** schizophrenia  **Exclusion:** schizophreniform disorders (ICD-9 CM code 295.8), <20 years old and, previous cancers  **Sample:** Linked to cancer registry | The National Health Insurance Research Database  **Mental illness:** schizophrenia (ICD-9 CM code 295) | **Study period:** Mar 1995 – Dec 2007  **Follow-up:** not reported for women group  **Mean age:** reported by category  **Classification**: ICD-9 CM | **Mental illness:**  **N=46 447**  ICC: N=124 | ICC: SIR=1.58 (1.48; 1.88)  ICC estimate risk was added in comparative pooled estimate |
| **Min-Lin et al., 2013**  **Taiwan**  **Retrospective cohort** | **Inclusion:** acute psychiatric ward for at least 1 month or have been followed regularly by  board-certified psychiatrists in an outpatient setting for at least 6 months  **Exclusion:** schizophreniform disorders (ICD-9 CM code 295.8), age <20, previous cancer missing data on date of birth, sex, or date of diagnosis and preexisting cancer  **Sample:** | health insurance database, National Health Insurance Research Database (NHIRD)  **Mental illness:** schizophrenia (ICD-9 CM code 295) | **Study period: 1997-2009**  **Follow-up:** 6.56 y  **Mean age:** reported by category  **Classification:** ICD-9 CM codes 180 | **Mental illness:**  **N=** **33 297**  ICC: N=74 | ICC: SIR= 1.41 (0.99; 2.02)  ICC estimate risk was added in comparative pooled estimate |
| **Chou et al. 2011**  **Taiwan**  **Retrospective cohort** | **Inclusion:** schizophrenia diagnosis  **Exclusion:** previous diagnosis of cancer; subjects who developed schizophrenia between 2000 and 2008  **Sample:** | NHIRD: national health insurance research database  **Mental illness**: schizophrenia (ICD-9-CM code 295 except 295.8) | **Study period:** 1999-2008  **Follow-up:** 9 years  **Mean age:** not reported for female group  **Classification:** CD-9 CM codes 180 | **Mental illness:**  **N= 59257**  **ICC: N=54**  Control (general population)  N= 178156  ICC: N=211 | ICC: HR= 0.77 (0.57; 1.04)  age and gender matched control group from the general population  ICC estimate risk was added in comparative pooled estimate |
| **Barak et al., 2008**  **Israel**  **Retrospective cohort** | **Inclusion:** women, ≥ 18 years, inpatients (lifetime)  **Exclusion:** patients treated only in ambulatory settings  **Sample:** Linked to cancer registry | Abarbanel Mental Health Center in Bat-Yam, Israel with the National Cancer Registry of Israel  **Mental illness:** serious mental illness except schizophrenia and schizophrenia | **Study period:** 1960-2005  **Follow-up:** not specified  **Mean age:** only specified age at cancer diagnosis  **Classification:** ICD-9 | **Mental illness (serious mental illness)**  **N=6 243**  ICC=16  **Mental illness (schizophrenia)**  **N=2 011**  ICC=12 | ICC:  Mental illness (serious mental illness): SIR=0.97 (0.55; 1.57)  Mental illness (schizophrenia): SIR=1.15 (0.60; 2.02)  ICC estimate risk was added in comparative pooled estimate |
| **Barak et al., 2005**  **Israel**  **Retrospective cohort** | **Inclusion**: patients diagnosed with schizophrenia and records registered in the computerized database  **Exclusion:** not specified  **Sample:** Linked to cancer registry | Abarbanel Mental Health Center in Bat-Yam, Israel with the National Cancer Registry of Israel  **Mental illness:** schizophrenia according to Diagnostic and Statistical Manual (of Mental Disorders) (DSM)-IV criteria | **Study period:** 1993-2003  **Follow-up:** not specified  **Mean age:** not specified for women  **Classification:** ICD-9 | **Mental illness:**  **N=1 247**  ICC: N=3 | ICC: SIR= 0.58 (0.12; 1.70)  ICC estimate risk was added in comparative pooled estimate |
| **Goldacre et al., 2005**  **UK**  **Retrospective cohort** | **Inclusion:** schizophrenia  **Exclusion:** not specified  **Sample:** Linked to cancer registry | Oxford Record Linkage Study  **Mental illness:** schizophrenia | **Study period:** 1963-1999  **Follow-up:** not specified  **Mean age:** not specified for women  **Classification:** ICD-9-180 | **Mental illness:**  **N=not reported**  ICC: N=10  **General population:**  **N=not reported**  ICC: N=262 | ICC: adjusted RR=1.17 (0.55; 2.18)  Adjusted for gender, age in 5-year bands, and time period in single calendar years  ICC estimate risk was added in comparative pooled estimate |
| **Litcherman et al., 2001**  **Finland**  **Retrospective cohort** | **Inclusion:** schizophrenia  **Exclusion:** not specified  **Sample:** population-based record-linkage | Finnish Cancer Registry, National Hospital Discharge, Disability pension registry  **Mental illness:** schizophrenia (ICD8 or 9, coded as 295) | **Study period:** 1971-1996  **Follow-up:** not specified  **Mean age:** not specified for women  **Classification:** not specified | **Mental illness:**  **N=11 418**  ICC: N=11 | ICC: SIR=0.93 (0.45; 1.93)  ICC estimate risk was added in comparative pooled estimate |
| **Mortensen et al., 1989**  **Denmark**  **Retrospective cohort** | **Inclusion:** schizophrenia on a census day in 1957  **Exclusion:** cancer before the start of observation period; age >100 yo  **Sample:** population-based record-linkage | Danish psychiatric hospital records; Danish cancer registry  **Mental illness:** schizophrenia | **Study period: S**ep 1957-Dec 1984  **Follow-up:** not specified  **Mean age:** not specified  **Classification:** not specified | **Mental illness:**  **N=Not specified**  ICC: N=20 | ICC: SIR=0.68  ICC estimate risk was not added in comparative pooled estimate since no 95%CI was reported |

| **Author**  **Year**  **Country**  **Study design** | **Study population inclusion/exclusion criteria**  **Study groups matching** | **Study cohort and data source** | **Study period**  **Follow-up length (Y/PY)**  **Mean age (years)**  **Classification** | **Exposed/Non exposed cases** | **Risk estimate** |
| --- | --- | --- | --- | --- | --- |
| **FEMALE PRISONERS** | | | |  |  |
| **Lüchtenborg et al., 2024**  **UK**  **Match-cohort** | **Inclusion:** individuals aged 18–120 years and a first primary invasive cancer diagnosed in prison  **Exclusion:** no matching patients could be identified in the general population, missing vital status dates  **Sample**: Matching was done in a 1:5 ratio according to 5-year age group, diagnosis year, cancer site, and disease | National Cancer Registration and Analysis Service (NCRAS), National Disease Registration Service (NDRS) within NHS England. | **Study period:** Jan 1998 – Dec 2017  **Mean follow up:** 20-year period  **Mean age:** reported by category  **Classification:** ICD10-D06 | **Prison Inmates: N= not reported**  ICC: N=3  Carcinoma in situ: N=83  ICC: N=22  **Comparator (general population)**  N=not reported  ICC: N=not reported | ICC in situ:  ASIRR 2·13 [1·91–2·36] over 20-years period  ICC estimate risk was not added in comparative pooled estimate |
| **de Luget et al., 2022**  **France**  **Prospective cohort** | **Inclusion:** Prison inmates aged 25-65 years, volunteers, good understanding of the French language  **Exclusion:** not specified  **Sample:** cohort | Medical records of Baumettes prison | **Study period:** Apr 2015-Jun 2019  **Follow-up:** not applicable  **Mean age:** 38.9 ± 9.5  **Classification:** Bethesda | **Prison Inmates:**  **N= 201**  HSIL: N=7 | Not Included in risk estimate pooled analysis - Cannot reproduce 2x2 table |
| **Jodry et al. 2021**  **USA**  **Retrospective case-control** | **Inclusion:** women >= 21 years old; receiving care at GHS with a chart flag as justice involved women; performing cervical cytology any time within GHS  **Exclusion:** unsatisfactory pap tests  **Sample:** controls matched by age in a 2:1 ratio | Medical records : Grady health System (GHS) : public hospital (Atlanta) | **Study period:** Oct 2010- Jul 2018  **Follow-up:** not applicable  **Mean age:** not specified  **Classification:** Bethesda | **Prison Inmates:**  **N=191**  HSIL: N=8  **Control (general population)**  **N=395**  HSIL: N=3 | HSIL entered with 2x2 table in pooled comparative analysis |
| **Puglisi et al., 2019**  **USA**  **Cross-sectional** | **Inclusion:** US residents, ages 18 and older, including individuals in non-institutional group housing (e.g., college dormitories, military barracks) and without permanent housing (e.g., living in a homeless shelter). Survey respondents who had ever been arrested and booked were considered to have a history of criminal justice involvement  **Exclusion:** currently institutionalized individuals (e.g., hospitalized, currently incarcerated) are excluded in this survey  **Sample**: Survey | National Survey on Drug Use and Health (NSDUH)  Criminal justice involvement within the last year and none in the past year | **Study period:** 2015-2017  **Mean follow up:** not applicable  **Mean age**: not specified  **Classification:** Not specified | Criminal justice involvement:  N = not reported  ICC: N = not reported | Not Included in risk estimate pooled analysis - Cannot reproduce 2x2 table |
| **Kouyoumdjian et al., 2017**  **Canada**  **Retrospective cohort** | **Inclusion:** women admitted to provincial correctional facilities for adults in Ontario in 2000 (admitted to custody but not yet sentenced, or incarcerated)  **Exclusion:** matching inaccurate between the databases, cancer identified before admission  **Sample: l**inked to cancer registry, compared to general population | Registered persons database  Ministry of Community Safety and Correctional Services | **Study period:** 2000-2012  **Follow-up:** until 31 Dec 2012  **Mean age:** not reported  **Classification:** ICD-O-3- C53 | **Prison Inmates:**  **N=4 747**  ICC: N=18 | ICC: SIR data cannot be extracted from graph  ICC estimate risk was not added in comparative pooled estimate  ICC: incidence 10 years 18 (0.3) cases per 1000-person years |
| **Zlotorzynska et al et al. 2016**  **USA**  **Retrospective cohort** | **Inclusion:** persons incarcerated in state of Georgia  **Exclusion:** participants in the cohort who were alive on 1 January 1998.  **Sample:** linked to the national cancer register | GA prisoner cohort from our previous study to the GA  Comprehensive Cancer Registry (GCCR)  History of incarceration | **Study period:** 1998-2010  **Mean follow up:** 12 years  **Mean age**: reported by category  **Classification:** ICD-O-3 | History of incarceration  N = not reported  ICC HIV+: N=1  ICC HIV-: N=1 | ICC:  HIV+: incidence per 100000PY  11.4 (0.6; 56.4)  HIV-: incidence per 100000PY  11.4 (0.6; 56.4)  ICC estimate risk was not added in comparative pooled estimate |
| **Vasconcellos et al., 2012**  **Brazil**  **Cross-sectional** | **Inclusion:** women inmates 18-60 yo  **Exclusion:** not specified  **Sample:** cohort | Medical records (on site) | **Study period:** Jan 2008-Mar 2010  **Follow-up:** not applicable  **Mean age:** 30.5 (range 18–60)  **Classification:** cytology | **Prison Inmates:**  **N= 190**  CIN2/3: N=2 | Not Included in risk estimate pooled analysis - Cannot reproduce 2x2 table |
| **Lessa et al., 2012**  **Brazil**  **Retrospective cohort** | **Inclusion:** incarcerated women, gynaecological records  **Exclusion:** prenatal care monitoring records  **Sample:** cohort | Patient records archived in the penal institution | **Study period:** Jan 2003-Jul 2010  **Follow-up:** not applicable  **Median age:** 29 years IQR: 12  **Classification: cytology** | **Prison Inmates:**  **N= 672**  HSIL: N=1  Insitu : N=2  CIN2+ : N=15 | Not Included in risk estimate pooled analysis - Cannot reproduce 2x2 table |
| **Zonta et al., 2012**  **Brazil**  **Cross-sectional** | **Inclusion:** women inmates, 18-60 years old,  sexually active, signed informed consent  **Exclusion:** not specified  **Sample:** cohort | Medical records of a Female Prison in São Paulo | **Study period:** Feb 2006-Dec 2007  **Follow-up:** not applicable  **Mean age:** not specified  **Classification:** Bethesda | **Prison Inmates:**  **N=409**  HSIL: N=2  ICC: N=1 | Not Included in risk estimate pooled analysis - Cannot reproduce 2x2 table |
| **Davies et al., 2010**  **UK**  **Retrospective cohort** | **Inclusion:** survey respondents who had ever been arrested and booked were considered to have a history of criminal justice involvement  **Exclusion:** not specified  **Sample**: linked to the national cancer register | Office for National Statistics,  The Thames Cancer Registry  Closed women’s prison (HMP Holloway | **Study period:** 1986-2005  **Mean follow up:** 10-year period  **Mean age:** reported by category  **Classification:** not specified | **Prison Inmates: N=102**  ICC: N=3  Carcinoma in situ : N=83 | Not Included in risk estimate pooled analysis - Cannot reproduce 2x2 table |
| **Fabiano et al., 2010**  **Italy**  **Cross-sectional** | **Inclusion:** women inmates in Rome accepting to fill the questionnaire and perform screening tests  **Exclusion:** not specified  **Sample:** cohort | Medical records of the Rebibbia Female Jail  of Rome | **Study period:** not specified  **Follow-up:** not applicable  **Mean age:** not specified  **Classification:** Bethesda | **Prison inmates:**  **N=98**  HSIL: N=4 | Not Included in risk estimate pooled analysis - Cannot reproduce 2x2 table |
| **Binswanger et al., 2009**  **USA**  **Cross-sectional** | **Inclusion:** survey respondents who had ever been arrested and booked were considered to have a history of criminal justice involvement  **Exclusion:** Age ≤ 17 and ≥ 66 years  **Sample**: linked to the national cancer register | Survey of Inmates in State and Federal Correctional Facilities (SISFCF)  Survey of Inmates in Local  Jails (SILJ)  National Health Interview Survey-Sample Adult  File (NHIS-SAF) for non-institutionalized adults  Prisoners, jail inmates | **Study period:** 2002-2004  **Follow-up:** not applicable  **Mean age:** reported by category  **Classification:** not specified | **Jail Inmates: N=1 952**  ICC: N=107  **Prison inmates:  N=3 333**  ICC: N=172  **Comparator:  N= 41 951**  ICC: N=458 | ICC:  Jail: OR = 4.16 (3.13; 5.53)  Prison: OR = 4.82 (3.74; 6.22)  ICC estimate risk was added in comparative pooled estimate |
| **Gonzalez et al. 2008**  **Spain**  **Cross-sectional** | **Inclusion:** prisoners in Alecante, voluntarily **attended** the gynaecological clinic  **Exclusion:** not specified  **Sample:** cohort | Medical records: gynaecological clinic in Foncalent prison | **Study period:** May 2003 - Dec 2005  **Follow-up:** not applicable  **Mean age:** not reported for only women  **Classification:** Bethesda | **Prison inmates:  N=219**  HSIL: N=4 | Not Included in risk estimate pooled analysis - Cannot reproduce 2x2 table |
| **Clarke et al., 2007**  **USA**  **Retrospective cohort** | **Inclusion:** incarcerated women  **Exclusion:** not specified  **Sample:** cohort | Medical records in Rhode Island Department of Corrections (RI DOC) | **Study period:** 1999-2004  **Follow-up:** not applicable  **Mean age:** not specified  **Classification:** Cytology | **Prison inmates:**  **N=785**  CIN2+: N=37 | Not Included in risk estimate pooled analysis - Cannot reproduce 2x2 table |
| **Proca et al. 2006**  **USA**  **Retrospective cohort** | **Inclusion:** incarcerated women  **Exclusion:** not specified  **Sample:** population-based record-linkage | Medical records (on site) from Correctional center in Columbus, Ohio | **Study period:** not specified  **Follow-up:** not applicable  **Mean age:** not specified  **Classification:** Bethesda | **Prison inmates:**  **N=1 024**  HSIL: N=13  ICC: N=0  **Control (general population)**  **N=40 933**  HSIL: N=246  ICC: N=41 | HSIL and ICC entered with 2x2 table in pooled comparative analysis |
| **Baillargeon et al., 2004**  **USA**  **Retrospective cohort** | **Inclusion:** women inmates  **Exclusion:** not specified  **Sample:** cohort | Medical records at the Texas department of criminal justice prison | **Study period: Jan 1999-Dec 2001**  **Follow-up:** not applicable  **Mean age:** not reported for only women  **Classification:** ICD-10 | **Prison Inmates:**  **N=36 425**  ICC: N=58  *per100000 inmates | ICC: OR=2.3 (0.3; 17.2)  ICC estimate risk was added in comparative pooled estimate |
| **Martin et al., 1998**  **Canada**  **Prospective cohort** | **Inclusion:** inmates, aged 20-34 years old, volounteering for a pap smear  **Exclusion:** not specified  **Sample:** population-based record-linkage | Medical records of Burnaby Correctional Centre for Women (BCCW); British  Columbia Cervical Cytology Screening; Program (BC CCSP) Registry | **Study period:** Jan-Dec 1995  **Follow-up:** not applicable  **Mean age:** not specified  **Classification:** cytology | **Prison Inmates:**  **N=93**  Moderate Marked/Malignant lesions: N=10 | Not included incorrect categories |
| **Cu-uvin et al., 1995**  **USA**  **Retrospective cohort** | **Inclusion:** HIV-seropositive women, incarcerated  **Exclusion:** not specified  **Sample:** cohort | medical records Rhode Island Adult Correctional Institute | **Study period:** Jan 1987-Jul 1992  **Follow-up:** not applicable  **Mean age:** 30 years (range: 18-34)  **Classification:** Bethesda | **Prison Inmates:**  **N=191**  HSIL*: N=6  *HIV+ and HIV- | Not Included in risk estimate pooled analysis - Cannot reproduce 2x2 table |
| **Stevens et al., 1995**  **USA**  **Cross-sectional** | **Inclusion:** > 18 years, HIV test, agreed to be tested  **Exclusion:** pap smear with indeterminate result  **Sample:** | Medical records of Massachusetts Correctional Institute-Framingham | **Study period:** Jan 1994 -Jun 1994  **Follow-up:** not applicable  **Mean age:** 31 years (range 20-48)  **Classification:** Bethesda | **Prison inmates:**  **N=45**  HSIL: N=3  In situ: N=1 | Not Included in risk estimate pooled analysis - Cannot reproduce 2x2 table |
| **Downey et al., 1994**  **UK**  **Prospective cohort** | **Inclusion:** Prisoners, volunteers  **Exclusion:** not specified  **Sample:** population-based record-linkage | Medical records at Holloway prison | **Study period:** Jun 1986-Mar 1991  **Follow-up:** not specified  **Median age:** prison inmates: 27 (range 17-58); general population: 33.5 (range 17-58)  **Classification:** cytology | **Prison inmates:**  **N=4 405**  CIN2 : N=157  CIN3 : N=93  ICC: N=2  **Control (general population)**  **N=46 055**  CIN2 : N=434  CIN3 : N=380  ICC: N=33 | ICC entered with 2x2 table in pooled comparative analysis |
| **Bickell et al., 1991**  **USA**  **Cross-sectional** | **Inclusion:** <50 years, ability to  speak English, intact uterine cervix,  history of heterosexual relations, and  competency to give informed consent  **Exclusion:** not specified  **Sample:** cohort | Medical records at detainees at the New York City Correctional Institute for Women | **Study period:** four nonsuccessive weeks in 1988  **Follow-up:** not applicable  **Mean age:** 26.6 ± 6.2  **Classification:** Bethesda | **Prison inmates:**  **N=104**  Abnormal : N=9  ICC: N=0 | Not Included in risk estimate pooled analysis - Cannot reproduce 2x2 table |
| **Karsai et al., 1988**  **Canada**  **Cross-sectional cohort** | **Inclusion:** prisoners and screened by a pap smear  **Exclusion:** not specified  **Sample:** population-based record-linkage | British Colombia Corrections Branch, cervical cytology database | **Study period:** 1975-1983  **Follow-up:** not specified  **Mean age:** only reported by category  **Classification:** cytology | **Prison Inmates:**  **N=2 440**  CIN3: N=157 | CIN3: RR=2.82 (2.46; 3.28)  ICC estimate risk was added in comparative pooled estimate |
| **Audet-Lapointe et al., 1971**  **Canada**  **Prospective cohort** | **Inclusion:** Prison inmate of Montreal  **Exclusion:** not specified  **Sample:** cohort | Medical records | **Study period:** Oct 1964 – Mar 1968  **Follow-up:** not applicable  **Mean age:** 34.2 (range: 17-62)  **Classification:** Papanicolaou | **Prison Inmates:**  **N=337**  ICC: N=10 | Not Included in risk estimate pooled analysis - Cannot reproduce 2x2 table |
| **Keighley et al., 1968**  **UK**  **Prospective cohort** | **Inclusion:** Prison inmates, FSW, valid cytology  **Exclusion:** not specified  **Sample:** cohort | Medical records form women's prison in London, | **Study period:** Jan-Dec 1966  **Follow-up:** not specified  **Mean age:** only reported by category  **Classification:** cytology | **Prison Inmates:**  **N=185**  In situ: N=19 | Not Included in risk estimate pooled analysis - Cannot reproduce 2x2 table |
| **Moghissi et al., 1968**  **USA**  **Prospective cohort** | **Inclusion:** women incarcerated  **Exclusion:** prisoners with than 90 days sentences  **Sample:** matched control group | Medical records Detroit House of Correction in the State of Michigan | **Study period:** Jul 1962-Dec 1965  **Follow-up:** not applicable  **Mean age:** range: 16-74  **Classification:** Papanicolaou | **Prison Inmates:**  **N= 460**  CIN3+: N=16  ICC : N=13  **Control :**  **N=460**  CIN3+ : N=8  ICC : N=4 | CIN3+, ICC entered with 2x2 table in pooled comparative analysis |

aPR: adjusted prevalence ratio; IR: incidence rate; aIRR: adjusted incidence rate rati,; SR: standardized rate

**Appendix 7: List of included references**

1. Abraham AG, D'Souza G, Jing Y, Gange SJ, Sterling TR, Silverberg MJ, et al. Invasive cervical cancer risk among HIV-infected women: a North American multicohort collaboration prospective study. J Acquir Immune Defic Syndr. 2013;62(4):405-13.

2. Adami HO, McLaughlin JK, Hsing AW, Wolk A, Ekbom A, Holmberg L, et al. Alcoholism and cancer risk: a population-based cohort study. Cancer Causes Control. 1992;3(5):419-25.

3. Allardice GM, Hole DJ, Brewster DH, Boyd J, Goldberg DJ. Incidence of malignant neoplasms among HIV-infected persons in Scotland. Br J Cancer. 2003;89(3):505-7.

4. Araujo AC, Carvalho NO, Teixeira NC, Souza TT, Murta ED, Faria IM, et al. Incidence of cervical intraepithelial neoplasia in a cohort of HIV-infected women. Int J Gynaecol Obstet. 2012;117(3):211-6.

5. Aston O, Sutradhar R, Rabeneck L, Paszat L. Risk of Invasive Cervical Cancer Among Immigrants in Ontario, Canada. J Obstet Gynaecol Can. 2019;41(1):21-8.

6. Audet-Lapointe P. Detection of cervical cancer in a women's prison. Can Med Assoc J. 1971;104(6):509-11.

7. Azerkan F, Zendehdel K, Tillgren P, Faxelid E, Sparen P. Risk of cervical cancer among immigrants by age at immigration and follow-up time in Sweden, from 1968 to 2004. Int J Cancer. 2008;123(11):2664-70.

8. Baillargeon J, Pollock BH, Leach CT, Gao SJ. The association of neoplasms and HIV infection in the correctional setting. Int J STD AIDS. 2004;15(5):348-51.

9. Barak Y, Achiron A, Mandel M, Mirecki I, Aizenberg D. Reduced cancer incidence among patients with schizophrenia. Cancer. 2005;104(12):2817-21.

10. Barak Y, Levy T, Achiron A, Aizenberg D. Breast cancer in women suffering from serious mental illness. Schizophr Res. 2008;102(1-3):249-53.

11. Bassal R, Shalev V, Eisenberg VH, Stein-Reisner O, Schejter E. The Association Between Depression and Invasive and In-situ Cervical Tumors: A Large Population Based Cohort Study. Isr Med Assoc J. 2023;25(7):490-4.

12. Battagello J, Monetti D, Rizzato S, Rosano A, Stocco CF, Zamberlan S, et al. Young immigrant women and cervical cancer screening: participation and lesions detected at the first screening round. Epidemiol Prev. 2022;46(3):173-80.

13. Bedimo RJ, McGinnis KA, Dunlap M, Rodriguez-Barradas MC, Justice AC. Incidence of non-AIDS-defining malignancies in HIV-infected versus noninfected patients in the HAART era: impact of immunosuppression. J Acquir Immune Defic Syndr. 2009;52(2):203-8.

14. Beiki O, Allebeck P, Nordqvist T, Moradi T. Cervical, endometrial and ovarian cancers among immigrants in Sweden: importance of age at migration and duration of residence. Eur J Cancer. 2009;45(1):107-18.

15. Bickell NA, Vermund SH, Holmes M, Safyer S, Burk RD. Human papillomavirus, gonorrhea, syphilis, and cervical dysplasia in jailed women. Am J Public Health. 1991;81(10):1318-20.

16. Biggar RJ, Chaturvedi AK, Goedert JJ, Engels EA, Study HACM. AIDS-related cancer and severity of immunosuppression in persons with AIDS. J Natl Cancer Inst. 2007;99(12):962-72.

17. Binswanger IA, Krueger PM, Steiner JF. Prevalence of chronic medical conditions among jail and prison inmates in the USA compared with the general population. J Epidemiol Community Health. 2009;63(11):912-9.

18. Boardman LA, Cotter K, Raker C, Cu-Uvin S. Cervical intraepithelial neoplasia grade 2 or worse in human immunodeficiency virus-infected women with mildly abnormal cervical cytology. Obstet Gynecol. 2008;112(2 Pt 1):238-43.

19. Botha MH, Van der Merwe FH, Snyman LC, Dreyer GJ, Visser C, Dreyer G. Utility of Extended HPV Genotyping as Primary Cervical Screen in an Unscreened Population With High HIV Co-Infection Rate. J Low Genit Tract Dis. 2023;27(3):212-6.

20. Bristow CC, Brown B, Marg L, Iñiguez RI, Meckel-Parker K, Silverman JG, et al. Prevalence and correlates of cervical abnormalities among female sex workers in Tijuana, Mexico. Int J STD AIDS. 2019;30(9):861-7.

21. Brown B, Blas MM, Cabral A, Byraiah G, Guerra-Giraldez C, Sarabia-Vega V, et al. Human papillomavirus prevalence, cervical abnormalities and risk factors among female sex workers in Lima, Peru. Int J STD AIDS. 2012;23(4):242-7.

22. Buchacz K, Baker RK, Palella FJ, Jr., Chmiel JS, Lichtenstein KA, Novak RM, et al. AIDS-defining opportunistic illnesses in US patients, 1994-2007: a cohort study. Aids. 2010;24(10):1549-59.

23. Cambrea SC, Aschie M, Resul G, Mitroi AF, Chisoi A, Nicolau AA, et al. HPV and HIV Coinfection in Women from a Southeast Region of Romania-PICOPIV Study. Medicina (Kaunas). 2022;58(6).

24. Campari C, Fedato C, Iossa A, Petrelli A, Zorzi M, Anghinoni E, et al. Cervical cancer screening in immigrant women in Italy: a survey on participation, cytology and histology results. Eur J Cancer Prev. 2016;25(4):321-8.

25. Campari C, Fedato C, Petrelli A, Zorzi M, Cogo C, Caprioglio A, et al. HPV prevalence and risk of pre-cancer and cancer in regular immigrants in Italy: results from HPV DNA test-based screening pilot programs. Infect Agent Cancer. 2015;10:14.

26. Castilho JL, Luz PM, Shepherd BE, Turner M, Ribeiro SR, Bebawy SS, et al. HIV and cancer: a comparative retrospective study of Brazilian and U.S. clinical cohorts. Infect Agent Cancer. 2015;10:4.

27. Castle PE, Befano B, Schiffman M, Wentzensen N, Lorey T, Poitras N, et al. A comparison of high-grade cervical abnormality risks in women living with and without human immunodeficiency virus undergoing routine cervical-cancer screening. Prev Med. 2022;162:107157.

28. Chan R, Khoo L, Ho TH, Koh CF, Lee IW, Yam KL, et al. A comparative study of cervical cytology, colposcopy and PCR for HPV in female sex workers in Singapore. Int J STD AIDS. 2001;12(3):159-63.

29. Chaturvedi AK, Madeleine MM, Biggar RJ, Engels EA. Risk of human papillomavirus-associated cancers among persons with AIDS. J Natl Cancer Inst. 2009;101(16):1120-30.

30. Chaturvedi AK, Mbulaiteye SM, Engels EA. Underestimation of relative risks by standardized incidence ratios for AIDS-related cancers. Ann Epidemiol. 2008;18(3):230-4.

31. Chaussade H, Le Marec F, Coureau G, Leleux O, Neau D, Lazaro E, et al. Incidence of lung and human papilloma virus-associated malignancies in HIV-infected patients. AIDS. 2022;36(5):665-73.

32. Chen CH, Chung CY, Wang LH, Lin C, Lin HL, Lin HC. Risk of cancer among HIV-infected patients from a population-based nested case-control study: implications for cancer prevention. BMC Cancer. 2015;15:133.

33. Chen LY, Hung YN, Chen YY, Yang SY, Pan CH, Chen CC, et al. Cancer incidence in young and middle-aged people with schizophrenia: nationwide cohort study in Taiwan, 2000-2010. Epidemiol Psychiatr Sci. 2018;27(2):146-56.

34. Chen YC, Li CY, Liu HY, Lee NY, Ko WC, Ko NY. Effect of antiretroviral therapy on the incidence of cervical neoplasia among HIV-infected women: a population-based cohort study in Taiwan. AIDS. 2014;28(5):709-15.

35. Cheng CS, Chen WY, Chang HM, Pan CH, Su SS, Tsai SY, et al. Unfavorable cancer mortality-to-incidence ratios in patients with schizophrenia: A nationwide cohort study in Taiwan, 2000-2019. Acta Psychiatr Scand. 2023;148(4):347-58.

36. Chou FH, Tsai KY, Su CY, Lee CC. The incidence and relative risk factors for developing cancer among patients with schizophrenia: a nine-year follow-up study. Schizophr Res. 2011;129(2-3):97-103.

37. Clarke JG, Phipps M, Rose J, Hebert M, Rosengard C, Ray M, et al. Follow-Up of Abnormal Pap Smears Among Incarcerated Women. Journal of Correctional Health Care. 2007;13(1):22-6.

38. Clifford GM, Polesel J, Rickenbach M, Dal Maso L, Keiser O, Kofler A, et al. Cancer risk in the Swiss HIV Cohort Study: associations with immunodeficiency, smoking, and highly active antiretroviral therapy. J Natl Cancer Inst. 2005;97(6):425-32.

39. Cooksley CD, Hwang LY, Waller DK, Ford CE. HIV-related malignancies: community-based study using linkage of cancer registry and HIV registry data. Int J STD AIDS. 1999;10(12):795-802.

40. Cu-Uvin S, Flanagan K, Culff K, Eastman-Abaya R, Nitta K, Griffith R, et al. Cervical Dysplasia Among Incarcerated Women: A Comparison of HIV-Seropositive and HIV-Seronegative Inmates. Journal of Women's Health. 1996;5(6):603-8.

41. Curry CL, Sage YH, Vragovic O, Stier EA. Minimally abnormal Pap testing and cervical histology in HIV-infected women. J Womens Health (Larchmt). 2012;21(1):87-91.

42. Dahlman D, Li X, Magnusson H, Sundquist J, Sundquist K. Cervical cancer among Swedish women with drug use disorders: A nationwide epidemiological study. Gynecol Oncol. 2021;160(3):742-7.

43. Davies EA, Sehgal A, Linklater KM, Heaps K, Moren C, Walford C, et al. Cancer in the London prison population, 1986-2005. J Public Health (Oxf). 2010;32(4):526-31.

44. Davies O, Rajamanoharan S, Balachandran T. Cervical screening in HIV-positive women in the East of England: recent CD4 as the predictive risk factor. Int J STD AIDS. 2015;26(13):945-50.

45. de Aguiar SR, Villanova FE, Martins LC, dos Santos MS, Maciel Jde P, Falcão LF, et al. Human papillomavirus: prevalence and factors associated in women prisoners population from the Eastern Brazilian Amazon. J Med Virol. 2014;86(9):1528-33.

46. Delage de Luget C, Jauffret C, Faust C, Knight S, Bartoli C, Ricard E. Cervical Dysplasia and Treatments Barrier in Jail: A Study in Marseille's Detention Center-Les Baumettes, France. Womens Health Rep (New Rochelle). 2022;3(1):670-7.

47. Denny L, Boa R, Williamson AL, Allan B, Hardie D, Stan R, et al. Human papillomavirus infection and cervical disease in human immunodeficiency virus-1-infected women. Obstet Gynecol. 2008;111(6):1380-7.

48. Di Felice E, Caroli S, Paterlini L, Campari C, Prandi S, Giorgi Rossi P. Cervical cancer epidemiology in foreign women in Northern Italy: role of human papillomavirus prevalence in country of origin. Eur J Cancer Prev. 2015;24(3):223-30.

49. Di Stefano L, Coppola G, Moro S, Colageo E, Cellini A, Coletti G. Cervical-vaginal disease in HIV immunosuppressed patients: management and present screening programme. Eur J Gynaecol Oncol. 2006;27(3):267-70.

50. Downey GP, Gabriel G, Deery AR, Crow J, Walker PG. Management of female prisoners with abnormal cervical cytology. Bmj. 1994;308(6941):1412-3.

51. Dreyer G, Snyman LC, Van der Merwe FH, Richter KL, Dreyer GJ, Visser C, et al. Phase I of the DiaVACCS screening trial: Study design, methods, population demographics and baseline results. S Afr Med J. 2022;112(7):478-86.

52. Duan R, Zhang H, Wu A, Li C, Li L, Xu X, et al. Prevalence and risk factors for anogenital HPV infection and neoplasia among women living with HIV in China. Sex Transm Infect. 2022;98(4):247-54.

53. Eastment MC, Gupta A, James J, Richardson BA, Pinder L, Kim HN, et al. Cervical cancer screening, abnormal results, and follow-up in women with substance use-related diagnoses. Subst Abus. 2022;43(1):925-31.

54. Eastment MC, Gupta A, James J, Richardson BA, Pinder L, Kim HN, et al. Cervical cancer screening, abnormal results, and follow-up in women with substance use-related diagnoses. Subst Abus. 2022;43(1):925-31.

55. Engels EA, Biggar RJ, Hall HI, Cross H, Crutchfield A, Finch JL, et al. Cancer risk in people infected with human immunodeficiency virus in the United States. Int J Cancer. 2008;123(1):187-94.

56. Engels EA, Pfeiffer RM, Goedert JJ, Virgo P, McNeel TS, Scoppa SM, et al. Trends in cancer risk among people with AIDS in the United States 1980-2002. Aids. 2006;20(12):1645-54.

57. Fernandez Villalobos NV, Ruffieux Y, Haas AD, Chinogurei C, Cornell M, Taghavi K, et al. Cervical precancer and cancer incidence among insured women with and without HIV in South Africa. Int J Cancer. 2024;154(2):273-83.

58. Fink G, Abdulcadir J, Johnson-Agbakwu CE. Rates of Cervical Cancer Screening and Dysplasia Among Refugees in a Health Care Safety Net System. J Immigr Minor Health. 2023;25(6):1315-22.

59. Frisch M, Biggar RJ, Engels EA, Goedert JJ. Association of cancer with AIDS-related immunosuppression in adults. Jama. 2001;285(13):1736-45.

60. Galceran J, Marcos-Gragera R, Soler M, Romaguera A, Ameijide A, Izquierdo A, et al. Cancer incidence in AIDS patients in Catalonia, Spain. Eur J Cancer. 2007;43(6):1085-91.

61. Gallagher B, Wang Z, Schymura MJ, Kahn A, Fordyce EJ. Cancer incidence in New York State acquired immunodeficiency syndrome patients. Am J Epidemiol. 2001;154(6):544-56.

62. Gallo F, Caprioglio A, Castagno R, Ronco G, Segnan N, Giordano L. Inequalities in cervical cancer screening utilisation and results: A comparison between Italian natives and immigrants from disadvantaged countries. Health Policy. 2017;121(10):1072-8.

63. Garcia-Gil M, Elorza J-M, Banque M, Comas-Cufí M, Blanch J, Ramos R, et al. Linking of Primary Care Records to Census Data to Study the Association between Socioeconomic Status and Cancer Incidence in Southern Europe: A Nation-Wide Ecological Study. PLoS ONE. 2014;9(10):e109706.

64. Gardella B, Agarossi A, Dominoni M, Pagano I, Del Frati S, Di Giminiani M, et al. Risk Analysis Stratification of CIN 2+ Development in a Cohort of Women Living with HIV with Negative Pap Smear and HR-HPV Test during a Long-Term Follow-Up. Vaccines (Basel). 2023;11(2).

65. Gitsch G, Kainz C, Reinthaller A, Kopp W, Tatra G, Breitenecker G. Cervical neoplasia and human papilloma virus infection in prostitutes. Genitourin Med. 1991;67(6):478-80.

66. Gleize L, Laudon F, Sun LY, Challeton-de Vathaire C, Le Vu B, de Vathaire F. Cancer registry of French Polynesia: results for the 1990-1995 period among native and immigrant population. Eur J Epidemiol. 2000;16(7):661-7.

67. Goldacre MJ, Kurina LM, Wotton CJ, Yeates D, Seagroat V. Schizophrenia and cancer: an epidemiological study. Br J Psychiatry. 2005;187:334-8.

68. González C, Canals J, Ortiz M, Muñoz L, Torres M, García-Saiz A, et al. Prevalence and determinants of high-risk human papillomavirus (HPV) infection and cervical cytological abnormalities in imprisoned women. Epidemiol Infect. 2008;136(2):215-21.

69. Grabar S, Hleyhel M, Belot A, Bouvier AM, Tattevin P, Pacanowski J, et al. Invasive cervical cancer in HIV-infected women: risk and survival relative to those of the general population in France. Results from the French Hospital Database on HIV (FHDH)-Agence Nationale de Recherches sur le SIDA et les Hepatites Virales (ANRS) CO4 cohort study. HIV Med. 2019;20(3):222-9.

70. Grulich AE, McCredie M, Coates M. Cancer incidence in Asian migrants to New South Wales, Australia. Br J Cancer. 1995;71(2):400-8.

71. Harris TG, Burk RD, Palefsky JM, Massad LS, Bang JY, Anastos K, et al. Incidence of cervical squamous intraepithelial lesions associated with HIV serostatus, CD4 cell counts, and human papillomavirus test results. Jama. 2005;293(12):1471-6.

72. Heard I, Potard V, Costagliola D. Limited impact of immunosuppression and HAART on the incidence of cervical squamous intraepithelial lesions in HIV-positive women. Antivir Ther. 2006;11(8):1091-6.

73. Helleberg M, Gerstoft J, Afzal S, Kronborg G, Larsen CS, Pedersen C, et al. Risk of cancer among HIV-infected individuals compared to the background population: impact of smoking and HIV. AIDS. 2014;28(10):1499-508.

74. Hemminki K, Li X, Czene K. Cancer risks in first-generation immigrants to Sweden. Int J Cancer. 2002;99(2):218-28.

75. Hernandez-Ramirez RU, Shiels MS, Dubrow R, Engels EA. Cancer risk in HIV-infected people in the USA from 1996 to 2012: a population-based, registry-linkage study. Lancet HIV. 2017;4(11):e495-e504.

76. Hessol NA, Seaberg EC, Preston-Martin S, Massad LS, Sacks HS, Silver S, et al. Cancer risk among participants in the women's interagency HIV study. J Acquir Immune Defic Syndr. 2004;36(4):978-85.

77. Hleyhel M, Belot A, Bouvier AM, Tattevin P, Pacanowski J, Genet P, et al. Risk of AIDS-defining cancers among HIV-1-infected patients in France between 1992 and 2009: results from the FHDH-ANRS CO4 cohort. Clin Infect Dis. 2013;57(11):1638-47.

78. Hopenhayn C, Bush H, Christian A, Shelton BJ. Comparative analysis of invasive cervical cancer incidence rates in three Appalachian states. Prev Med. 2005;41(5-6):859-64.

79. Hu K, Wang J, Sparén P, Herweijer E, Sjölander A, Adami HO, et al. Invasive cervical cancer, precancerous lesions, and cervical screening participation among women with mental illness in Sweden: a population-based observational study. Lancet Public Health. 2023;8(4):e266-e75.

80. Hu K, Wang J, Sparén P, Herweijer E, Sjölander A, Adami HO, et al. Invasive cervical cancer, precancerous lesions, and cervical screening participation among women with mental illness in Sweden: a population-based observational study. Lancet Public Health. 2023;8(4):e266-e75.

81. Ishi K, Suzuki F, Saito A, Kubota T. Prevalence of human papillomavirus infection and its correlation with cervical lesions in commercial-sex workers in Japan. J Obstet Gynaecol Res. 2000;26(4):253-7.

82. Jansåker F, Li X, Sundqvist A, Sundquist K, Borgfeldt C. Cervical neoplasia in relation to socioeconomic and demographic factors – a nationwide cohort study (2002–2018). Acta Obstetricia et Gynecologica Scandinavica. 2023;102(1):114-21.

83. Ji J, Sundquist K, Ning Y, Kendler KS, Sundquist J, Chen X. Incidence of cancer in patients with schizophrenia and their first-degree relatives: a population-based study in Sweden. Schizophr Bull. 2013;39(3):527-36.

84. Jia H, Wang X, Long Z, Li L. Human papillomavirus infection and cervical dysplasia in female sex workers in Northeast China: an observational study. BMC Public Health. 2015;15:695.

85. Jodry D, Blemur D, Nguyen ML, Kuhn T, Easley K, Wang H, et al. Criminal Justice Involvement and Abnormal Cervical Cancer Screening Results Among Women in an Urban Safety Net Hospital. J Low Genit Tract Dis. 2021;25(2):81-5.

86. Joshi S, Kulkarni V, Darak T, Mahajan U, Srivastava Y, Gupta S, et al. Cervical cancer screening and treatment of cervical intraepithelial neoplasia in female sex workers using "screen and treat" approach. Int J Womens Health. 2015;7:477-83.

87. Kadhel P, Multigner L, Bardinet F, Goerger-Sow M, Janky E. Cervical intraepithelial neoplasia and invasive cancer risks in women infected with HIV in the French West Indies. HIV Med. 2012;13(1):79-82.

88. Kaneko N, Nishino Y, Ito Y, Nakaya T, Kanemura S. Association of Socioeconomic Status Assessed by Areal Deprivation With Cancer Incidence and Detection by Screening in Miyagi, Japan Between 2005 and 2010. J Epidemiol. 2023;33(10):521-30.

89. Karsai H, Coldman AJ, Gavin D, Brumelle S, Boyes DA, Anderson GH, et al. Cervical intraepithelial neoplasia in female prisoners in British Columbia. Cmaj. 1988;139(8):733-6.

90. Keighley E. Carcinoma of the cervix among prostitutes in a women's prison. Br J Vener Dis. 1968;44(3):254-5.

91. Keller MJ, Burk RD, Massad LS, Eltoum IE, Hessol NA, Castle PE, et al. Cervical Precancer Risk in HIV-Infected Women Who Test Positive for Oncogenic Human Papillomavirus Despite a Normal Pap Test. Clin Infect Dis. 2015;61(10):1573-81.

92. Kiertiburanakul S, Likhitpongwit S, Ratanasiri S, Sungkanuparph S. Malignancies in HIV-infected Thai patients. HIV Med. 2007;8(5):322-3.

93. Kisely S, Forsyth S, Lawrence D. Why do psychiatric patients have higher cancer mortality rates when cancer incidence is the same or lower? Aust N Z J Psychiatry. 2016;50(3):254-63.

94. Klein KL, Goron AR, Taylor GH, Roque DM. Pap smear outcomes in elderly women living with HIV and HIV-negative matched controls. Int J STD AIDS. 2022;33(11):954-62.

95. Kouyoumdjian FG, Pivnick L, McIsaac KE, Wilton AS, Lofters A, Hwang SW. Cancer prevalence, incidence and mortality in people who experience incarceration in Ontario, Canada: A population-based retrospective cohort study. PLoS One. 2017;12(2):e0171131.

96. Kreitchmann R, Bajotto H, da Silva DA, Fuchs SC. Squamous intraepithelial lesions in HIV-infected women: prevalence, incidence, progression and regression. Arch Gynecol Obstet. 2013;288(5):1107-13.

97. Lamminmaki M, Leivonen A, Sarkeala T, Virtanen A, Heinavaara S. Health inequalities among Russian-born immigrant women in Finland: Longitudinal analysis on cervical cancer incidence and participation in screening. J Migr Health. 2022;6:100117.

98. Le GM, Gomez SL, Clarke CA, Glaser SL, West DW. Cancer incidence patterns among Vietnamese in the United States and Ha Noi, Vietnam. Int J Cancer. 2002;102(4):412-7.

99. Lee SO, Lee JE, Lee S, Lee SH, Kang JS, Son H, et al. Nationwide population-based incidence of cancer among patients with HIV/AIDS in South Korea. Sci Rep. 2022;12(1):9974.

100. Lee SO, Lee JE, Sim YK, Lee S, Ko WS, Kim J, et al. Changing trends in the incidence and spectrum of cancers between 1990 and 2021 among HIV-infected patients in Busan, Korea. J Infect Chemother. 2023;29(6):571-5.

101. Lehtovirta P, Finne P, Nieminen P, Skogberg K, Savonius H, Paavonen J, et al. Prevalence and risk factors of squamous intraepithelial lesions of the cervix among HIV-infected women - a long-term follow-up study in a low-prevalence population. Int J STD AIDS. 2006;17(12):831-4.

102. Lessa PR, Ribeiro SG, Lima DJ, Nicolau AI, Damasceno AK, Pinheiro AK. Presence of high-grade intraepithelial lesions among women deprived of their liberty: a documental study. Rev Lat Am Enfermagem. 2012;20(2):354-61.

103. Leung KM, Yeoh GP, Cheung HN, Fong FY, Chan KW. Prevalence of abnormal Papanicolaou smears in female sex workers in Hong Kong. Hong Kong Med J. 2013;19(3):203-6.

104. Lichtermann D, Ekelund J, Pukkala E, Tanskanen A, Lönnqvist J. Incidence of cancer among persons with schizophrenia and their relatives. Arch Gen Psychiatry. 2001;58(6):573-8.

105. Lin CY, Lane HY, Chen TT, Wu YH, Wu CY, Wu VY. Inverse association between cancer risks and age in schizophrenic patients: a 12-year nationwide cohort study. Cancer Sci. 2013;104(3):383-90.

106. Lin GM, Chen YJ, Kuo DJ, Jaiteh LE, Wu YC, Lo TS, et al. Cancer incidence in patients with schizophrenia or bipolar disorder: a nationwide population-based study in Taiwan, 1997-2009. Schizophr Bull. 2013;39(2):407-16.

107. Liu B, Lao X, Feng Y, Liu J, Jiao M, Zhao M, et al. Cancer prevalence among the rural poverty-stricken population in Northeast China. Cancer Manag Res. 2019;11:5101-12.

108. Loy A, McInerney J, Pilkington L, Keegan H, Delamere S, Martin CM, et al. Human papillomavirus DNA and mRNA prevalence and association with cervical cytological abnormalities in the Irish HIV population. Int J STD AIDS. 2015;26(11):789-95.

109. Luce D, Michel S, Dugas J, Bhakkan B, Menvielle G, Joachim C, et al. Disparities in cancer incidence by area-level socioeconomic status in the French West Indies. Cancer Causes Control. 2017;28(11):1305-12.

110. Lüchtenborg M, Huynh J, Armes J, Plugge E, Hunter RM, Visser R, et al. Cancer incidence, treatment, and survival in the prison population compared with the general population in England: a population-based, matched cohort study. Lancet Oncol. 2024;25(5):553-62.

111. Mak R, Van Renterghem L, Cuvelier C. Cervical smears and human papillomavirus typing in sex workers. Sex Transm Infect. 2004;80(2):118-20.

112. Makoha FW, Raheem MA. Gynecological cancer incidence in a hospital population in Saudi Arabia: the effect of foreign immigration over two decades. J Obstet Gynaecol Res. 2008;34(4):538-42.

113. Malmstrom S, Wagner P, Yilmaz A, Svedhem V, Carlander C. Failure to restore CD4+ cell count associated with infection-related and noninfection-related cancer. AIDS. 2022;36(3):447-57.

114. Mancuso P, Djuric O, Collini G, Serventi E, Massari M, Zerbini A, et al. Risk of cancer in individuals with alcohol and drug use disorders: a registry-based study in Reggio Emilia, Italy. Eur J Cancer Prev. 2020;29(3):270-8.

115. Mancuso P, Djuric O, Collini G, Serventi E, Massari M, Zerbini A, et al. Risk of cancer in individuals with alcohol and drug use disorders: a registry-based study in Reggio Emilia, Italy. Eur J Cancer Prev. 2020;29(3):270-8.

116. Martin RE. A review of a prison cervical cancer screening program in British Columbia. Can J Public Health. 1998;89(6):382-6.

117. Massad LS, Hessol NA, Darragh TM, Minkoff H, Colie C, Wright RL, et al. Cervical cancer incidence after up to 20 years of observation among women with HIV. Int J Cancer. 2017;141(8):1561-5.

118. Massad LS, Seaberg EC, Watts DH, Minkoff H, Levine AM, Henry D, et al. Long-term incidence of cervical cancer in women with human immunodeficiency virus. Cancer. 2009;115(3):524-30.

119. Massad LS, Xie X, D'Souza G, Darragh TM, Minkoff H, Wright R, et al. Incidence of cervical precancers among HIV-seropositive women. Am J Obstet Gynecol. 2015;212(5):606 e1-8.

120. Massad LS, Xie X, Minkoff H, Kassaye S, Karim R, Darragh TM, et al. Longitudinal assessment of abnormal Papanicolaou test rates among women with HIV. Aids. 2020;34(1):73-80.

121. Mayans MV, Maguire A, Miret M, Casabona J. Disproportionate high incidence of invasive cervical cancer as an AIDS-indicative disease among young women in Catalonia, Spain. Sex Transm Dis. 1999;26(9):500-3.

122. Mayor AM, Santiago-Rodriguez EJ, Rios-Olivares E, Tortolero-Luna G, Hunter-Mellado RF. Malignancies Trends in a Hispanic Cohort of HIV Persons in Puerto Rico before and after cART. Int J Cancer Res. 2016;12(2):92-100.

123. McDermott S, Desmeules M, Lewis R, Gold J, Payne J, Lafrance B, et al. Cancer incidence among Canadian immigrants, 1980-1998: results from a national cohort study. J Immigr Minor Health. 2011;13(1):15-26.

124. Metz CK, Skof AS, Sehouli J, Siedentopf JP, Gebert P, Weiss F, et al. Assessment of high-risk human papillomavirus infections and associated cervical dysplasia in HIV-positive pregnant women in Germany: a prospective cross-sectional two-centre study. Arch Gynecol Obstet. 2023;308(1):207-18.

125. Michaud JM, Zhang T, Shireman TI, Lee Y, Wilson IB. Hazard of Cervical, Oropharyngeal, and Anal Cancers in HIV-Infected and HIV-Uninfected Medicaid Beneficiaries. Cancer Epidemiol Biomarkers Prev. 2020;29(7):1447-57.

126. Moghissi KS, Mack HC. Epidemiology of cervical cancer: study of a prison population. Am J Obstet Gynecol. 1968;100(5):607-14.

127. Mohamed AA, Chamberlain AM, Yost KJ, Jenkins G, Finney Rutten LJ, Wieland ML, et al. Cancer incidence in the Somali population of Olmsted County: A Rochester epidemiology project study. Cancer Med. 2023;12(19):20027-34.

128. Morales DR, Moreno-Martos D, Matin N, McGettigan P. Health conditions in adults with HIV compared with the general population: A population-based cross-sectional analysis. EClinicalMedicine. 2022;47:101392.

129. Mortensen PB. The incidence of cancer in schizophrenic patients. J Epidemiol Community Health. 1989;43(1):43-7.

130. Mousavi SM, Hemminki K. Cancer incidence, trends, and survival among immigrants to Sweden: a population-based study. Eur J Cancer Prev. 2015;24 Suppl 1:S1-S63.

131. Newnham A, Harris J, Evans HS, Evans BG, Moller H. The risk of cancer in HIV-infected people in southeast England: a cohort study. Br J Cancer. 2005;92(1):194-200.

132. Ntuli ST, Maimela E, Skaal L, Mogale M, Lekota P. Abnormal cervical cytology amongst women infected with human immunodeficiency virus in Limpopo province, South Africa. Afr J Prim Health Care Fam Med. 2020;12(1):e1-e4.

133. Oliveira PM, Oliveira RP, Travessa I, Gomes MV, Santos ML, Grassi MF. Prevalence and risk factors for cervical intraepithelial neoplasia in HIV-infected women in Salvador, Bahia, Brazil. Sao Paulo Med J. 2010;128(4):197-201.

134. Park B, Ahn KH, Choi Y, Kim JH, Seong H, Kim YJ, et al. Cancer Incidence Among Adults With HIV in a Population-Based Cohort in Korea. JAMA Netw Open. 2022;5(8):e2224897.

135. Parkin DM, Iscovich J. Risk of cancer in migrants and their descendants in Israel: II. Carcinomas and germ-cell tumours. International Journal of Cancer. 1997;70(6):654-60.

136. Phelps RM, Smith DK, Heilig CM, Gardner LI, Carpenter CC, Klein RS, et al. Cancer incidence in women with or at risk for HIV. Int J Cancer. 2001;94(5):753-7.

137. Pinto VM, Golub JE, Tancredi MV, Alencar RS, Miranda AE. Cervical cytology and histopathologic abnormalities in women living with AIDS in São Paulo, Brazil. J Acquir Immune Defic Syndr. 2011;57 Suppl 3(Suppl 3):S212-6.

138. Prener A, Nielsen NH, Hansen JP, Jensen OM. Cancer pattern among Greenlandic Inuit migrants in Denmark, 1968-1982. Br J Cancer. 1987;56(5):679-84.

139. Proca DM, Rofagha S, Keyhani-Rofagha S. High grade squamous intraepithelial lesion in inmates from Ohio: cervical screening and biopsy follow-up. Cytojournal. 2006;3:15.

140. Prummel MV, Young SW, Candido E, Nishri D, Elit L, Marrett LD. Cervical cancer incidence in ontario women: differing sociodemographic gradients by morphologic type (adenocarcinoma versus squamous cell). Int J Gynecol Cancer. 2014;24(7):1341-6.

141. Puglisi LB, Winkelman TNA, Gross CP, Wang EA. Cancer Prevalence Among Adults with Criminal Justice Involvement from a National Survey. J Gen Intern Med. 2020;35(3):967-8.

142. Ralli M, Urbano S, Gobbi E, Shkodina N, Mariani S, Morrone A, et al. Health and Social Inequalities in Women Living in Disadvantaged Conditions: A Focus on Gynecologic and Obstetric Health and Intimate Partner Violence. Health Equity. 2021;5(1):408-13.

143. Raz Y, Keinan-Boker L, Goren S, Soen-Grisaru G, Cohen D, Grisaru D. The effect of age at immigration on cervical cancer incidence: a population-based cohort study of 1 486 438 Israeli women. Int J Gynecol Cancer. 2019;29(3):492-6.

144. Reece A. Lifetime prevalence of cervical neoplasia in addicted and medical patients. Aust N Z J Obstet Gynaecol. 2007;47(5):419-23.

145. Richards SD, Stonbraker S, Halpern M, Amesty S. Cervical cancer screening among transactional female sex workers in the Dominican Republic. Int J STD AIDS. 2018;29(12):1204-14.

146. Rihana N, Nanjappa S, Sullivan C, Velez AP, Tienchai N, Greene JN. Malignancy Trends in HIV-Infected Patients Over the Past 10 Years in a Single-Center Retrospective Observational Study in the United States. Cancer Control. 2018;25(1):1073274818797955.

147. Robbins HA, Pfeiffer RM, Shiels MS, Li J, Hall HI, Engels EA. Excess cancers among HIV-infected people in the United States. J Natl Cancer Inst. 2015;107(4).

148. Robbins HA, Shiels MS, Pfeiffer RM, Engels EA. Epidemiologic contributions to recent cancer trends among HIV-infected people in the United States. AIDS. 2014;28(6):881-90.

149. Rohner E, Sengayi M, Goeieman B, Michelow P, Firnhaber C, Maskew M, et al. Cervical cancer risk and impact of Pap-based screening in HIV-positive women on antiretroviral therapy in Johannesburg, South Africa. Int J Cancer. 2017;141(3):488-96.

150. Rojas Rojas T, Poizot-Martin I, Rey D, Duvivier C, Bani-Sadr F, Cabie A, et al. Incidence of cervical, breast and colorectal cancers between 2010 and 2015 in people living with HIV in France. PLoS One. 2022;17(3):e0261069.

151. Ruffieux Y, Muchengeti M, Egger M, Efthimiou O, Bartels L, Olago V, et al. Immunodeficiency and Cancer in 3.5 Million People Living With Human Immunodeficiency Virus (HIV): The South African HIV Cancer Match Study. Clin Infect Dis. 2021;73(3):e735-e44.

152. Sakdadech N, Muangmool T, Srisomboon J. HIV-Infected Women with Low-Grade Squamous Intraepithelial Lesion on Cervical Cytology Have Higher Risk of Underlying High-Grade Cervical Intraepithelial Neoplasia. Int J Environ Res Public Health. 2021;18(19).

153. Salters KA, Cescon A, Zhang W, Ogilvie G, Murray MC, Coldman A, et al. Cancer incidence among HIV-positive women in British Columbia, Canada: Heightened risk of virus-related malignancies. HIV Med. 2016;17(3):188-95.

154. Sanchez-Covarrubias AP, Crane J, Montgomerie EK, Potter JE, Duthely LM, Bahadue F, et al. Examining 5-Year Cervical Cytology Progression Among Minority Women Living With HIV and Baseline Negative Cytology. J Low Genit Tract Dis. 2022;26(4):304-9.

155. Sarkeala T, Lamminmaki M, Nygard M, Njor SH, Virtanen A, Leivonen A, et al. Cervical, liver and stomach cancer incidence and mortality in non-Western immigrant women: a retrospective cohort study from four Nordic countries. Acta Oncol. 2023;62(9):977-87.

156. Serraino D, Carrieri P, Pradier C, Bidoli E, Dorrucci M, Ghetti E, et al. Risk of invasive cervical cancer among women with, or at risk for, HIV infection. Int J Cancer. 1999;82(3):334-7.

157. Shen CC, Hu LY, Hu YW, Chang WH, Tang PL, Chen PM, et al. The Risk of Cancer in Patients With Obsessive-Compulsive Disorder: A Nationwide Population-Based Retrospective Cohort Study. Medicine (Baltimore). 2016;95(9):e2989.

158. Shiels MS, Pfeiffer RM, Gail MH, Hall HI, Li J, Chaturvedi AK, et al. Cancer burden in the HIV-infected population in the United States. J Natl Cancer Inst. 2011;103(9):753-62.

159. Sigvardsson S, Hardell L, Przybeck TR, Cloninger R. Increased cancer risk among Swedish female alcoholics. Epidemiology. 1996;7(2):140-3.

160. Silva L, Miranda A, Batalha R, Ferreira L, Santos M, Talhari S. High-risk human papillomavirus and cervical lesions among women living with HIV/AIDS in Brazilian Amazon, Brazil. Braz J Infect Dis. 2015;19(6):557-62.

161. Sirivongrangson P, Bollen LJ, Chaovavanich A, Suksripanich O, Virapat P, Tunthanathip P, et al. Screening HIV-infected women for cervical cancer in Thailand: findings from a demonstration project. Sex Transm Dis. 2007;34(2):104-7.

162. Soccio J, Brown M, Comino E, Friesen E. Pap smear screening, pap smear abnormalities and psychosocial risk factors among women in a residential alcohol and drug rehabilitation facility. J Adv Nurs. 2015;71(12):2858-66.

163. Spence AB, Levy ME, Monroe A, Castel A, Timpone J, Horberg M, et al. Cancer Incidence and Cancer Screening Practices Among a Cohort of Persons Receiving HIV Care in Washington, DC. J Community Health. 2021;46(1):75-85.

164. Srisomboon S, Tantipalakorn C, Muangmool T, Srisomboon J. Risk of High-Grade Cervical Lesions in Atypical Squamous Cells of Undetermined Significance (ASC-US) Cytology: Comparison between HIV-Infected and HIV-Negative Women. Asian Pac J Cancer Prev. 2021;22(2):547-51.

165. Stein L, Urban MI, O'Connell D, Yu XQ, Beral V, Newton R, et al. The spectrum of human immunodeficiency virus-associated cancers in a South African black population: results from a case-control study, 1995-2004. Int J Cancer. 2008;122(10):2260-5.

166. Stevens J, Zierler S, Cram V, Dean D, Mayer KH, De Groot AS. Risks for HIV Infection in Incarcerated Women. Journal of Women's Health. 1995;4(5):569-77.

167. Stewart KA, Allen SM, Chesnokova AE, Syed F, Levison JE. Incidence of abnormal cervical and vaginal cytology among women over age 65 years living with human immunodeficiency virus. Am J Obstet Gynecol. 2020;222(5):486.e1-.e10.

168. Suarez-Garcia I, Jarrin I, Iribarren JA, Lopez-Cortes LF, Lacruz-Rodrigo J, Masia M, et al. Incidence and risk factors of AIDS-defining cancers in a cohort of HIV-positive adults: Importance of the definition of incident cases. Enferm Infecc Microbiol Clin. 2013;31(5):304-12.

169. Tanaka LF, Latorre M, Gutierrez EB, Heumann C, Herbinger KH, Froeschl G. Trends in the incidence of AIDS-defining and non-AIDS-defining cancers in people living with AIDS: a population-based study from São Paulo, Brazil. Int J STD AIDS. 2017;28(12):1190-8.

170. Tavares MV, Nunes FC, Saleiro S, Mota F, Torgal I. Prevalence and predictors of abnormal Papanicolaou smears in HIV-infected women. Eur J Gynaecol Oncol. 2015;36(4):410-3.

171. Teixeira NC, Araujo AC, Correa CM, Lodi CT, Lima MI, Carvalho Nde O, et al. Prevalence and risk factors for cervical intraepithelial neoplasia among HIV-infected women. Braz J Infect Dis. 2012;16(2):164-9.

172. Thorsteinsson K, Ladelund S, Jensen-Fangel S, Katzenstein TL, Johansen IS, Pedersen G, et al. Incidence of cervical dysplasia and cervical cancer in women living with HIV in Denmark: comparison with the general population. HIV Med. 2016;17(1):7-17.

173. Thygesen LC, Mikkelsen P, Andersen TV, Tønnesen H, Juel K, Becker U, et al. Cancer incidence among patients with alcohol use disorders--long-term follow-up. Alcohol Alcohol. 2009;44(4):387-91.

174. Tønnesen H, Møller H, Andersen JR, Jensen E, Juel K. Cancer morbidity in alcohol abusers. Br J Cancer. 1994;69(2):327-32.

175. Tsugane S, de Souza JM, Costa ML, Jr., Mirra AP, Gotlieb SL, Laurenti R, et al. Cancer incidence rates among Japanese immigrants in the city of São Paulo, Brazil, 1969-78. Cancer Causes Control. 1990;1(2):189-93.

176. Ursu RG, Onofriescu M, Luca A, Prisecariu LJ, Salceanu SO, Nemescu D, et al. The Need for Cervical Cancer Control in HIV-Positive and HIV-Negative Women from Romania by Primary Prevention and by Early Detection Using Clinically Validated HPV/DNA Tests. PLoS One. 2015;10(7):e0132271.

177. Vallès X, Murga GB, Hernández G, Sabidó M, Chuy A, Lloveras B, et al. High prevalence of human papillomavirus infection in the female population of Guatemala. Int J Cancer. 2009;125(5):1161-7.

178. Videla S, Tarrats A, Ornelas A, Badia R, Castella E, Alcalde C, et al. Incidence of cervical high-grade squamous intraepithelial lesions in HIV-1-infected women with no history of cervical pathology: up to 17 years of follow-up. Int J STD AIDS. 2019;30(1):56-63.

179. Vincenza Fabiano LM, Maria Rosaria Giovagnoli, Salvatore Raffa, Cristina Vincenzoni, Fausto de Michetti, Francesco Bevere, Deborah French. Cervical cancer screening program based on HPV testing and conventional Papanicolaou cytology for jail inmates. Health. 2010;2

180. Visioli CB, Crocetti E, Zappa M, Iossa A, Andersson KL, Bulgaresi P, et al. Participation and risk of high grade cytological lesions among immigrants and Italian-born women in an organized cervical cancer screening program in Central Italy. J Immigr Minor Health. 2015;17(3):670-8.

181. Vogel M, Friedrich O, Lüchters G, Holleczek B, Wasmuth JC, Anadol E, et al. Cancer risk in HIV-infected individuals on HAART is largely attributed to oncogenic infections and state of immunocompetence. Eur J Med Res. 2011;16(3):101-7.

182. Vorsters A, Cornelissen T, Leuridan E, Bogers J, Vanden Broeck D, Benoy I, et al. Prevalence of high-risk human papillomavirus and abnormal pap smears in female sex workers compared to the general population in Antwerp, Belgium. BMC Public Health. 2016;16:477.

183. Wagner A, Skof AS, Sehouli J, Richter R, Henrich W, von Weizsacker K, et al. Genotype-specific high-risk human papillomavirus infections and risk factors for cervical dysplasia in women with human immunodeficiency virus in Germany: results from a single-center cross-sectional study. Int J Gynecol Cancer. 2022;32(6):716-23.

184. Wang Q, Ma X, Zhang X, Ong JJ, Jing J, Zhang L, et al. Human papillomavirus infection and associated factors for cervical intraepithelial neoplasia in women living with HIV in China: a cross-sectional study. Sex Transm Infect. 2019;95(2):140-4.

185. Weiderpass E, Ye W, Tamimi R, Trichopolous D, Nyren O, Vainio H, et al. Alcoholism and risk for cancer of the cervix uteri, vagina, and vulva. Cancer Epidemiol Biomarkers Prev. 2001;10(8):899-901.

186. Williams G, Mans DR, Garssen J, Visser O, Kramer D, Kunst AE. Cancer incidence and mortality of Surinamese migrants in the Netherlands: in-between Surinamese and Dutch levels? Cancer Causes Control. 2013;24(7):1375-83.

187. Winkler V, Holleczek B, Stegmaier C, Becher H. Cancer incidence in ethnic German migrants from the Former Soviet Union in comparison to the host population. Cancer Epidemiol. 2014;38(1):22-7.

188. Wong WC, Wun YT, Chan KW, Liu Y. Silent killer of the night: a feasibility study of an outreach well-women clinic for cervical cancer screening in female sex workers in Hong Kong. Int J Gynecol Cancer. 2008;18(1):110-5.

189. Wootten JC, Richard L, Blanchette PS, Wiener JC, Anderson KK. Cancer incidence and stage at diagnosis among people with recent-onset psychotic disorders: A retrospective cohort study using health administrative data from Ontario, Canada. Psychooncology. 2022;31(9):1510-8.

190. Wu C-T, Chiu L-T, Raturi VP. Investigation of the Correlation Between Mental Disorder and Cervical Cancer in Taiwan: A Nationwide Population-Based Cohort Study. Indian Journal of Gynecologic Oncology. 2023;21(1):29.

191. Zhang HY, Tiggelaar SM, Sahasrabuddhe VV, Smith JS, Jiang CQ, Mei RB, et al. HPV prevalence and cervical intraepithelial neoplasia among HIV-infected women in Yunnan Province, China: a pilot study. Asian Pac J Cancer Prev. 2012;13(1):91-6.

192. Zhang YX, Gui XE, Zhong YH, Rong YP, Yan YJ. Cancer in cohort of HIV-infected population: prevalence and clinical characteristics. J Cancer Res Clin Oncol. 2011;137(4):609-14.

193. Zhou G, Koroukian SM, Navale SM, Schiltz NK, Kim U, Rose J, et al. Cancer burden in women with HIV on Medicaid: A nationwide analysis. Womens Health (Lond). 2023;19:17455057231170061.

194. Zhu W, Mao Y, Tang H, McGoogan JM, Zhang ZF, Detels R, et al. Spectrum of malignancies among the population of adults living with HIV infection in China: A nationwide follow-up study, 2008-2011. PLoS One. 2019;14(7):e0219766.

195. Zlotorzynska M, Spaulding AC, Messina LC, Coker D, Ward K, Easley K, et al. Retrospective cohort study of cancer incidence and mortality by HIV status in a Georgia, USA, prisoner cohort during the HAART era. BMJ Open. 2016;6(4):e009778.

196. Zohar M, Micha B. Cancer incidence in people living with HIV/AIDS in Israel, 1981-2010. AIDS Res Hum Retroviruses. 2015;31(9):873-81.

197. Zonta MA, Monteiro J, Santos G, Jr., Pignatari AC. Oral infection by the Human Papilloma Virus in women with cervical lesions at a prison in São Paulo, Brazil. Braz J Otorhinolaryngol. 2012;78(2):66-72.

1. <https://datahelpdesk.worldbank.org/knowledgebase/articles/906519> [↑](#footnote-ref-1)
